# Supplementary material for: Copper-catalysed controllable hydrodefluorination of trifluoromethylated alkenes
Source: Royal Society of Chemistry journal article supplement (doi:10.1039/d3qo00691c), 2023-01-01

# Copper catalysed controllable hydrodefluorination of trifluoromethylated alkenes

Chong Lian,<sup>a,b,§</sup> Longlong Xi,<sup>b,§</sup> Yu Yuan,<sup>a,\*</sup> Zhuangzhi Shi,<sup>a,b,\*</sup> and Minyan Wang<sup>b,\*</sup>

<sup>a.</sup> College of Chemistry and Chemical Engineering, Yangzhou University, Yangzhou 225002, China

<sup>b.</sup> State Key Laboratory of Coordination Chemistry, Chemistry and Biomedicine Innovation Center (ChemBIC), School of Chemistry and Chemical Engineering, Nanjing University, Nanjing, China

<sup>§</sup> C.L. and L.X. contributed equally to this work

\* Corresponding Authors: M. Wang: [wangmy@nju.edu.cn](mailto:wangmy@nju.edu.cn)

Z. Shi: [shiz@nju.edu.cn](mailto:shiz@nju.edu.cn);

Y. Yuan: [yyuan@yzu.edu.cn](mailto:yyuan@yzu.edu.cn)

## Table of Contents

|                                                                                   |    |
|-----------------------------------------------------------------------------------|----|
| 1. General Information.....                                                       | 2  |
| 2. General Procedure for Synthesis of Starting Materials.....                     | 2  |
| 3. Experimental Procedures and Characterization of Products.....                  | 4  |
| 4. Gram-Sale Synthesis.....                                                       | 18 |
| 5. Synthetic Application.....                                                     | 18 |
| 6. Control Experiments.....                                                       | 22 |
| 7. DFT Calculations.....                                                          | 24 |
| 8. References.....                                                                | 55 |
| 9. Copies of <sup>1</sup> H, <sup>13</sup> C and <sup>19</sup> F NMR Spectra..... | 57 |

## 1. General Information

All new compounds were fully characterized. All reactions and manipulations involving air-sensitive compounds were performed using standard Schlenk techniques or in a glovebox. Anhydrous CH<sub>3</sub>CN and anhydrous MeOH were purchased from J&K Chemical and were used as received. <sup>1</sup>H, <sup>13</sup>C and <sup>19</sup>F NMR spectra were recorded on a Bruker AVANCE III 400 MHz or 500 MHz spectrometer. Chemical shifts (δ values) were reported δ values in ppm relative to chloroform (δ = 7.26 for <sup>1</sup>H NMR and δ = 77.00 for <sup>13</sup>C NMR, respectively). Mass spectra were conducted at Micromass Q-ToF instrument (ESI) and Agilent Technologies 5973N (EI). IR spectra were recorded on a FT-IR spectrometer. Unless otherwise noted, materials obtained from commercial suppliers were used without further purification. The preparation of the **1a-1b**, **1d-1e** **1g-1x** were described according to the reported literatures.<sup>1-2</sup>

## 2. General Procedure for Synthesis of Starting Materials

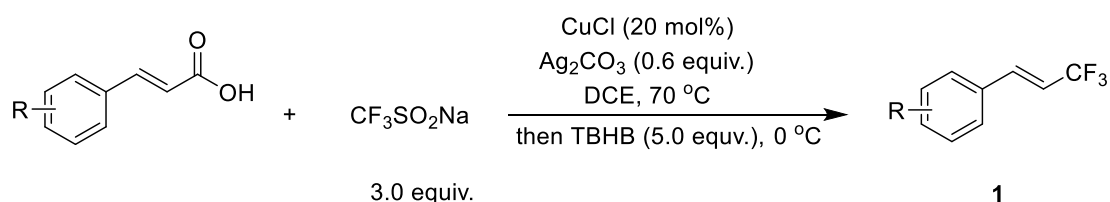

According to the literatures<sup>1a,2</sup>, to a reaction flask equipped with a reflux condenser was added  $\alpha,\beta$ -unsaturated carboxylic acid (5.0 mol, 1.0 equiv.), CF<sub>3</sub>SO<sub>2</sub>Na (2.34 g, 15.0 mol, 3.0 equiv.), CuCl (0.01 g, 1.0 mol, 0.2 equiv.), Ag<sub>2</sub>CO<sub>3</sub> (0.83 g, 3 mol, 0.6 equiv.), and DCE (50 mL). Then aqueous TBHP (70 wt. % in H<sub>2</sub>O) (3.2 mL, 25 mmol, 5 equiv.) was added at 0 °C with stirring. The reaction was heated at 70 °C and stirring for 24 h. The resulting mixture was filtered through a pad of celite and washed with CH<sub>2</sub>Cl<sub>2</sub> (20 mL). After concentrated in vacuum, the residue was purified by column chromatography to afford the corresponding product **1**.

### **(E)-1,3-Dimethyl-5-(3,3,3-trifluoroprop-1-en-1-yl)benzene**

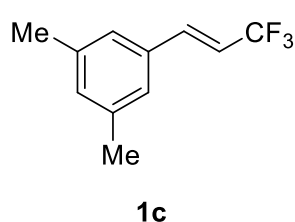

Following the general procedure, after column chromatography on silica afford **1c** as a colorless oil:  $^1\text{H NMR}$  (500 MHz,  $\text{CDCl}_3$ )  $\delta$  7.24 – 7.00 (m, 4H), 6.37 – 6.08 (m, 1H), 2.39 (s, 6H).  $^{13}\text{C NMR}$  (126 MHz,  $\text{CDCl}_3$ )  $\delta$  138.6, 138.1 (q,  $J = 7.1$  Hz), 133.5, 131.9, 125.6, 115.5 (q,  $J = 33.8$  Hz), 21.2.  $^{19}\text{F NMR}$  (471 MHz,  $\text{CDCl}_3$ )  $\delta$  -63.23. ATR-FTIR ( $\text{cm}^{-1}$ ): 3008, 2695, 2156, 1666, 1472, 1265, 937, 726; HRMS  $m/z$  (ESI) calculated for  $\text{C}_{11}\text{H}_{12}\text{F}_3$  ( $\text{M} + \text{H}$ ) $^+$  201.0886, found 201.0879.

### **(E)-1-Methoxy-3-(3,3,3-trifluoroprop-1-en-1-yl)benzene**

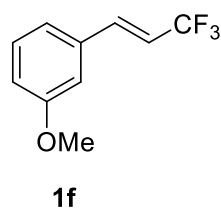

Following the general procedure, after column chromatography on silica afford **1f** as a colorless oil:  $^1\text{H NMR}$  (500 MHz,  $\text{CDCl}_3$ )  $\delta$  7.31 (t,  $J = 7.9$  Hz, 1H), 7.16 – 7.09 (m, 1H), 7.05 (t,  $J = 6.2$  Hz, 1H), 6.98 (s, 1H), 6.94 (dd,  $J = 8.2, 2.3$  Hz, 1H), 6.20 (dq,  $J = 16.1, 6.5$  Hz, 1H), 3.84 (s, 3H).  $^{13}\text{C NMR}$  (126 MHz,  $\text{CDCl}_3$ )  $\delta$  160.1, 137.8 (q,  $J = 6.8$  Hz), 134.9, 130.1, 123.7 (q,  $J = 268.9$  Hz), 120.2, 116.3 (q,  $J = 33.8$  Hz), 115.8, 112.9, 55.4.  $^{19}\text{F NMR}$  (471 MHz,  $\text{CDCl}_3$ )  $\delta$  -63.34. ATR-FTIR ( $\text{cm}^{-1}$ ): 3008, 2694, 2155, 1667, 1462, 1265, 1044, 763; HRMS  $m/z$  (ESI) calculated for  $\text{C}_{10}\text{H}_{10}\text{F}_3\text{O}$  ( $\text{M} + \text{H}$ ) $^+$  203.0678, found 203.0674.

### **(E)-4-(4,4,4-Trifluorobut-2-en-2-yl)-1,1'-biphenyl**

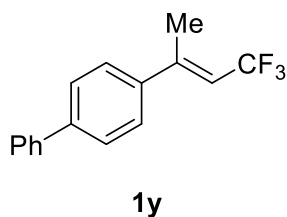

Following the general procedure, after column chromatography on silica afford **1y** as a colorless oil:  $^1\text{H NMR}$  (400 MHz,  $\text{CDCl}_3$ )  $\delta$  7.65 – 7.57 (m, 4H), 7.54 – 7.43 (m, 4H), 7.42 – 7.34 (m, 1H), 6.03 – 5.88 (m, 1H), 2.36 – 2.31 (m, 3H).  $^{13}\text{C NMR}$  (101 MHz,  $\text{CDCl}_3$ )  $\delta$  148.7, 142.1, 140.4, 139.7, 129.0,

127.8, 127.4, 127.2, 126.7, 115.9 (q,  $J = 33.8$  Hz), 17.5.  $^{19}\text{F}$  NMR (377 MHz,  $\text{CDCl}_3$ )  $\delta$  -56.89. ATR-FTIR ( $\text{cm}^{-1}$ ): 3008, 2692, 2156, 1470, 1265, 963, 763, 698; HRMS  $m/z$  (ESI) calculated for  $\text{C}_{15}\text{H}_{14}\text{F}_3$  ( $\text{M} + \text{H}$ ) $^+$  263.1042, found 263.1040.

### 3. Experimental Procedures and Characterization of Products

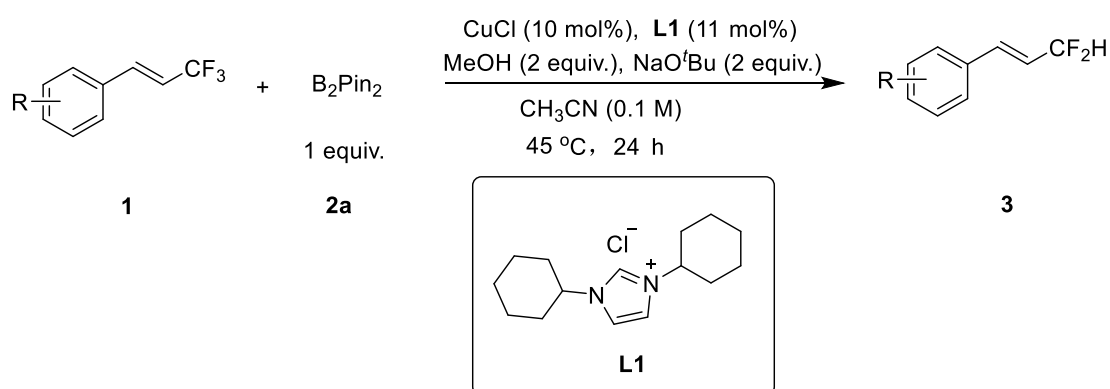

To a 25 mL Schlenk tube was added trifluoromethyl alkenes **1** (0.20 mmol, 1.0 equiv.),  $\text{CuCl}$  (2.0 mg, 0.02 mmol, 10 mol%), **L1** (5.6 mg, 0.024 mmol, 12 mol%),  $\text{NaO}^t\text{Bu}$  (38.4 mg, 0.4 mmol, 2.0 equiv.),  $\text{B}_2\text{pin}_2$  **2a** (50.8 mg, 0.2 mmol, 1.0 equiv.),  $\text{MeOH}$  (12.8 mg, 0.4 mmol, 2.0 equiv.), and  $\text{MeCN}$  (2 mL) under Ar atmosphere. The reaction mixture was stirred at  $45\text{ }^\circ\text{C}$  for 24 hours. The solution was then cooled to room temperature and the solvent was removed under vacuum directly. The crude products were purified by column chromatography on silica gel to afford the pure products.

#### (*E*)-4-(3,3-Difluoroprop-1-en-1-yl)-1,1'-biphenyl

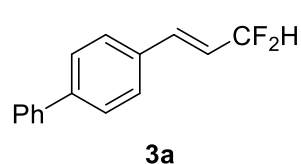

Following the general procedure, the reaction of **1a** (50.0 mg, 0.20 mmol, 1.0 equiv.),  $\text{CuCl}$  (2.0 mg, 0.02 mmol, 10 mol%), **L1** (5.6 mg, 0.024 mmol, 12 mol%),  $\text{NaO}^t\text{Bu}$  (38.4 mg, 0.4 mmol, 2.0 equiv.),  $\text{B}_2\text{pin}_2$  **2a** (50.8 mg, 0.2 mmol, 1.0 equiv.),  $\text{MeOH}$  (12.8 mg, 0.4 mmol, 2.0 equiv.), and  $\text{MeCN}$  (2 mL) under Ar atmosphere. The reaction mixture was stirred at  $45\text{ }^\circ\text{C}$  for 24 hours after column chromatography on silica afford **3a** (41.9 mg,

91%) as a white solid:  $^1\text{H NMR}$  (400 MHz,  $\text{CDCl}_3$ )  $\delta$  7.67 – 7.60 (m, 4H), 7.56 – 7.44 (m, 4H), 7.43 – 7.36 (m, 1H), 6.99 – 6.89 (m, 1H), 6.45 – 6.13 (m, 2H).  $^{13}\text{C NMR}$  (126 MHz,  $\text{CDCl}_3$ )  $\delta$  142.4, 140.4, 136.8 (t,  $J = 12.1$  Hz), 133.5, 129.0, 127.9, 127.6, 127.2, 121.0 (t,  $J = 23.9$  Hz), 115.5 (t,  $J = 233.6$  Hz).  $^{19}\text{F NMR}$  (471 MHz,  $\text{CDCl}_3$ )  $\delta$  -109.60. **ATR-FTIR** ( $\text{cm}^{-1}$ ): 3007, 2692, 2156, 1970, 1265, 1137, 970, 731; **HRMS m/z (ESI)** calculated for  $\text{C}_{15}\text{H}_{13}\text{F}_2$  ( $\text{M} + \text{H}$ ) $^+$  231.0980, found 231.0970.

**(E)-1-(3,3-Difluoroprop-1-en-1-yl)-4-methylbenzene**

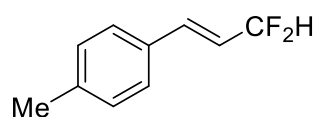

**3b**

Following the general procedure, the reaction of **1b** (37.2 mg, 0.20 mmol, 1.0 equiv.),  $\text{CuCl}$  (2.0 mg, 0.02 mmol, 10 mol%), **L1** (5.6 mg, 0.024 mmol, 12 mol%),  $\text{NaO}^t\text{Bu}$  (38.4 mg, 0.4 mmol, 2.0 equiv.),  $\text{B}_2\text{pin}_2$  **2a** (50.8 mg, 0.2 mmol, 1.0 equiv.),  $\text{MeOH}$  (12.8 mg, 0.4 mmol, 2.0 equiv.), and  $\text{MeCN}$  (2 mL) under Ar atmosphere. The reaction mixture was stirred at 45 °C for 24 hours after column chromatography on silica afford **3b** (23.5 mg, 70%) as a colorless oil:  $^1\text{H NMR}$  (400 MHz,  $\text{CDCl}_3$ )  $\delta$  7.34 (d,  $J = 8.0$  Hz, 2H), 7.18 (d,  $J = 8.0$  Hz, 2H), 6.89 – 6.80 (m, 1H), 6.41 – 6.07 (m, 2H), 2.37 (s, 3H).  $^{13}\text{C NMR}$  (101 MHz,  $\text{CDCl}_3$ )  $\delta$  139.7, 137.2 (t,  $J = 12.3$  Hz), 131.8, 129.6 127.3, 120.1 (t,  $J = 24.0$  Hz), 115.8 (t,  $J = 234.2$  Hz), 21.5.  $^{19}\text{F NMR}$  (377 MHz,  $\text{CDCl}_3$ )  $\delta$  -109.20. **ATR-FTIR** ( $\text{cm}^{-1}$ ): 3009, 2698, 1971, 1465, 1269, 1134, 967, 755; **HRMS m/z (ESI)** calculated for  $\text{C}_{10}\text{H}_{11}\text{F}_2$  ( $\text{M} + \text{H}$ ) $^+$  169.0823, found 169.0804.

**(E)-1-(3,3-Difluoroprop-1-en-1-yl)-3,5-dimethylbenzene**

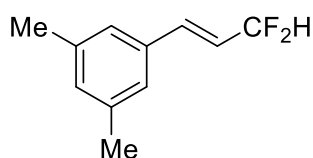

**3c**

Following the general procedure, the reaction of **1c** (40 mg, 0.20 mmol, 1.0 equiv.),  $\text{CuCl}$  (2.0 mg, 0.02 mmol, 10 mol%), **L1** (5.6 mg, 0.024 mmol, 12 mol%),  $\text{NaO}^t\text{Bu}$  (38.4 mg, 0.4 mmol, 2.0 equiv.),  $\text{B}_2\text{pin}_2$  **2a** (50.8 mg, 0.2 mmol, 1.0 equiv.),  $\text{MeOH}$  (12.8 mg, 0.4 mmol, 2.0 equiv.), and  $\text{MeCN}$  (2 mL) under Ar atmosphere. The reaction mixture was stirred at 45 °C for 24 hours after column chromatography on

silica afford **3c** (27.0 mg, 74%) as a colorless oil:  $^1\text{H NMR}$  (500 MHz,  $\text{CDCl}_3$ )  $\delta$  7.07 (s, 2H), 7.00 (s, 1H), 6.86 – 6.79 (m, 1H), 6.37 – 6.09 (m, 2H), 2.33 (s, 6H).  $^{13}\text{C NMR}$  (126 MHz,  $\text{CDCl}_3$ )  $\delta$  138.3, 137.4 (t,  $J = 12.3$  Hz), 134.4, 131.1, 125.1, 120.6 (t,  $J = 24.0$  Hz), 115.6 (t,  $J = 233.4$  Hz), 21.2.  $^{19}\text{F NMR}$  (471 MHz,  $\text{CDCl}_3$ )  $\delta$  -109.37. ATR-FTIR ( $\text{cm}^{-1}$ ): 3009, 2695, 2157, 1663, 1267, 1137, 969, 763; HRMS  $m/z$  (ESI) calculated for  $\text{C}_{11}\text{H}_{13}\text{F}_2$  ( $\text{M} + \text{H}$ ) $^+$  183.0980, found 183.0975.

**(E)-1-(3,3-Difluoroprop-1-en-1-yl)-2-methylbenzene**

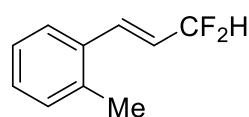

**3d**

Following the general procedure, the reaction of **1d** (37.2 mg, 0.20 mmol, 1.0 equiv.), CuCl (2.0 mg, 0.02 mmol, 10 mol%), **L1** (5.6 mg, 0.024 mmol, 12 mol%), NaO<sup>t</sup>Bu (38.4 mg, 0.4 mmol, 2.0 equiv.), B<sub>2</sub>pin<sub>2</sub> **2a** (50.8 mg, 0.2 mmol, 1.0 equiv.), MeOH (12.8 mg, 0.4 mmol, 2.0 equiv.), and MeCN (2 mL) under Ar atmosphere. The reaction mixture was stirred at 45 °C for 24 hours after column chromatography on silica afford **3d** (23.3 mg, 69%) as a white solid:  $^1\text{H NMR}$  (400 MHz,  $\text{CDCl}_3$ )  $\delta$  7.49 – 7.43 (m, 1H), 7.26 – 7.08 (m, 4H), 6.42 – 6.11 (m, 2H), 2.37 (s, 3H).  $^{13}\text{C NMR}$  (101 MHz,  $\text{CDCl}_3$ )  $\delta$  136.6, 135.1 (t,  $J = 12.2$  Hz), 133.7, 130.7, 129.3, 126.5, 126.3, 122.4 (t,  $J = 24.0$  Hz), 115.5 (t,  $J = 233.5$  Hz), 19.8.  $^{19}\text{F NMR}$  (377 MHz,  $\text{CDCl}_3$ )  $\delta$  -109.53. ATR-FTIR ( $\text{cm}^{-1}$ ): 3009, 2698, 1973, 1550, 1269, 1133, 970, 755; HRMS  $m/z$  (ESI) calculated for  $\text{C}_{10}\text{H}_{11}\text{F}_2$  ( $\text{M} + \text{H}$ ) $^+$  169.0833, found 169.0823.

**(E)-1-(Difluoromethyl)-4-(3,3-difluoroprop-1-en-1-yl)benzene**

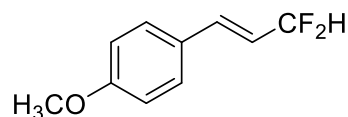

**3e**

Following the general procedure, the reaction of **1e** (40.4 mg, 0.20 mmol, 1.0 equiv.), CuCl (2.0 mg, 0.02 mmol, 10 mol%), **L1** (5.6 mg, 0.024 mmol, 12 mol%), NaO<sup>t</sup>Bu (38.4 mg, 0.4 mmol, 2.0 equiv.), B<sub>2</sub>pin<sub>2</sub> **2a** (50.8 mg, 0.2 mmol, 1.0 equiv.), MeOH (12.8 mg, 0.4 mmol, 2.0 equiv.), and MeCN (2 mL) under Ar atmosphere. The reaction

mixture was stirred at 45 °C for 24 hours after column chromatography on silica afford **3e** (33.2 mg, 90%) as a colorless oil: **<sup>1</sup>H NMR (500 MHz, CDCl<sub>3</sub>)** δ 7.38 (d, *J* = 8.5 Hz, 2H), 6.90 (d, *J* = 8.7 Hz, 2H), 6.86 – 6.78 (m, 1H), 6.36 – 6.07 (m, 2H), 3.83 (s, 3H). **<sup>13</sup>C NMR (126 MHz, CDCl<sub>3</sub>)** δ 160.7, 136.8 (t, *J* = 12.2 Hz), 128.8, 127.2, 118.8 (t, *J* = 23.9 Hz), 116.0 (t, *J* = 233.5 Hz), 114.3, 55.5. **<sup>19</sup>F NMR (471 MHz, CDCl<sub>3</sub>)** δ -108.67. **ATR-FTIR (cm<sup>-1</sup>):** 3009, 2698, 2577, 1584, 1461, 1272, 1125, 754; **HRMS m/z (ESI)** calculated for C<sub>10</sub>H<sub>11</sub>F<sub>2</sub>O (M + H)<sup>+</sup> 185.0772, found 185.0770.

**(E)-1-(3,3-Difluoroprop-1-en-1-yl)-3-methoxybenzene**

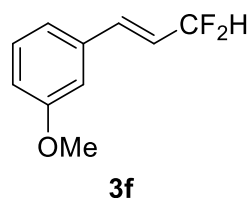

Following the general procedure, the reaction of **1f** (40.4 mg, 0.20 mmol, 1.0 equiv.), CuCl (2.0 mg, 0.02 mmol, 10 mol%), **L1** (5.6 mg, 0.024 mmol, 12 mol%), NaO<sup>t</sup>Bu (38.4 mg, 0.4 mmol, 2.0 equiv.), B<sub>2</sub>pin<sub>2</sub> **2a** (50.8 mg, 0.2 mmol, 1.0 equiv.), MeOH (12.8 mg, 0.4 mmol, 2.0 equiv.), and MeCN (2 mL) under Ar atmosphere. The reaction mixture was stirred at 45 °C for 24 hours after column chromatography on silica afford **3f** (22.8 mg, 62%) as a colorless oil: **<sup>1</sup>H NMR (500 MHz, CDCl<sub>3</sub>)** δ 7.29 (t, *J* = 7.9 Hz, 1H), 7.04 (d, *J* = 7.6 Hz, 1H), 6.97 (s, 1H), 6.90 (dd, *J* = 8.2, 2.4 Hz, 1H), 6.88 – 6.82 (m, 1H), 6.38 – 6.11 (m, 2H), 3.83 (s, 3H). **<sup>13</sup>C NMR (126 MHz, CDCl<sub>3</sub>)** δ 160.0, 137.2 (t, *J* = 12.1 Hz), 136.0, 130.0, 121.4 (t, *J* = 23.9 Hz), 120.0, 115.4 (t, *J* = 234.2 Hz), 115.2, 112.6, 55.4. **<sup>19</sup>F NMR (471 MHz, CDCl<sub>3</sub>)** δ -109.81. **ATR-FTIR (cm<sup>-1</sup>):** 3782, 3008, 2851, 2155, 1266, 1014, 763, 649; **HRMS m/z (ESI)** calculated for C<sub>10</sub>H<sub>11</sub>F<sub>2</sub>O (M + H)<sup>+</sup> 185.0772, found 185.0770.

**(E)-1-(3,3-Difluoroprop-1-en-1-yl)-2-methoxybenzene**

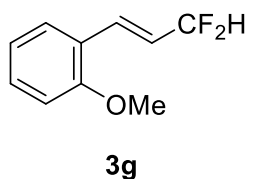

Following the general procedure, the reaction of **1g** (40.4 mg, 0.20 mmol, 1.0 equiv.), CuCl (2.0 mg, 0.02 mmol, 10 mol%), **L1** (5.6 mg, 0.024 mmol, 12 mol%), NaO<sup>t</sup>Bu (38.4 mg, 0.4 mmol, 2.0

equiv.), B<sub>2</sub>pin<sub>2</sub> **2a** (50.8 mg, 0.2 mmol, 1.0 equiv.), MeOH (12.8 mg, 0.4 mmol, 2.0 equiv.), and MeCN (2 mL) under Ar atmosphere. The reaction mixture was stirred at 45 °C for 24 hours after column chromatography on silica afford **3g** (19.3 mg, 53%) as a colorless oil: <sup>1</sup>H NMR (500 MHz, CDCl<sub>3</sub>) δ 7.48 (d, *J* = 7.5 Hz, 2H), 7.35 (t, *J* = 8.0 Hz, 1H), 7.26 – 7.16 (m, 1H), 6.99 (t, *J* = 7.5 Hz, 1H), 6.93 (d, *J* = 8.5 Hz, 1H), 6.42 – 5.95 (m, 1H), 3.90 (s, 3H). <sup>13</sup>C NMR (126 MHz, CDCl<sub>3</sub>) δ 157.6, 132.6 (t, *J* = 12.7 Hz), 130.7, 128.1, 123.5, 121.6 (t, *J* = 24.2 Hz), 120.8, 116.3 (t, *J* = 233.5 Hz), 111.1, 55.6. <sup>19</sup>F NMR (377 MHz, CDCl<sub>3</sub>) δ -108.77. ATR-FTIR (cm<sup>-1</sup>): 3007, 2692, 1469, 1265, 1150, 763, 731, 698; HRMS *m/z* (ESI) calculated for C<sub>10</sub>H<sub>11</sub>F<sub>2</sub>O (M + H)<sup>+</sup> 185.0772, found 185.0772.

**(E)-2-(3,3-Difluoroprop-1-en-1-yl)-1,4-dimethoxybenzene**

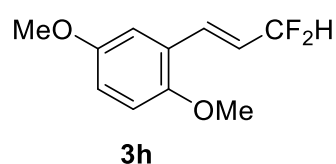

Following the general procedure, the reaction of **1h** (46.4 mg, 0.20 mmol, 1.0 equiv.), CuCl (2.0 mg, 0.02 mmol, 10 mol%), **L1** (5.6 mg, 0.024 mmol, 12 mol%), NaO<sup>t</sup>Bu (38.4 mg, 0.4 mmol, 2.0 equiv.), B<sub>2</sub>pin<sub>2</sub> **2a** (50.8 mg, 0.2 mmol, 1.0 equiv.), MeOH (12.8 mg, 0.4 mmol, 2.0 equiv.), and MeCN (2 mL) under Ar. The reaction mixture was stirred at 45 °C for 24 hours after column chromatography on silica afford **3h** (24.5 mg, 57%) as a colorless oil: <sup>1</sup>H NMR (400 MHz, CDCl<sub>3</sub>) δ 7.17 (dt, *J* = 16.0, 4.0 Hz, 1H), 6.99 (d, *J* = 2.8 Hz, 1H), 6.92 – 6.80 (m, 2H), 6.40 – 6.06 (m, 2H), 3.83 (s, 3H), 3.79 (s, 3H). <sup>13</sup>C NMR (101 MHz, CDCl<sub>3</sub>) δ 153.6, 152.0, 132.3 (t, *J* = 12.7 Hz), 121.7 (t, *J* = 24.2 Hz), 116.0 (t, *J* = 234.0 Hz), 115.8, 112.8, 112.3, 56.1, 55.8. <sup>19</sup>F NMR (377 MHz, CDCl<sub>3</sub>) δ -108.88. ATR-FTIR (cm<sup>-1</sup>): 3380, 3254, 2985, 2606, 1452, 1117, 1022, 755; HRMS *m/z* (ESI) calculated for C<sub>11</sub>H<sub>13</sub>F<sub>2</sub>O<sub>2</sub> (M + H)<sup>+</sup> 215.0878, found 215.0877.

**(E)-5-(3,3-Difluoroprop-1-en-1-yl)-1,2,3-trimethoxybenzene**



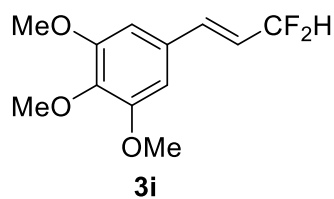

Following the general procedure, the reaction of **1i** (52.4 mg, 0.20 mmol, 1.0 equiv.), CuCl (2.0 mg, 0.02 mmol, 10 mol%), **L1** (5.6 mg, 0.024 mmol, 12 mol%), NaO<sup>t</sup>Bu (38.4 mg, 0.4 mmol, 2.0 equiv.), B<sub>2</sub>pin<sub>2</sub> **2a** (50.8 mg, 0.2 mmol, 1.0 equiv.), MeOH (12.8 mg, 0.4 mmol, 2.0 equiv.), and MeCN (2 mL) under Ar atmosphere. The reaction mixture was stirred at 45 °C for 24 hours after column chromatography on silica afford **3i** (33.1 mg, 68%) as a white solid: **<sup>1</sup>H NMR (400 MHz, CDCl<sub>3</sub>)** δ 6.85 – 6.75 (m, 1H), 6.65 (s, 2H), 6.47 – 6.07 (m, 2H), 3.87 (s, 6H), 3.86 (s, 3H). **<sup>13</sup>C NMR (101 MHz, CDCl<sub>3</sub>)** δ 153.6, 137.2 (t, *J* = 12.3 Hz), 130.2, 120.5 (t, *J* = 24.0 Hz), 115.5 (t, *J* = 234.5 Hz), 113.1, 104.6, 61.1, 56.3. **<sup>19</sup>F NMR (377 MHz, CDCl<sub>3</sub>)** δ -109.43. **ATR-FTIR (cm<sup>-1</sup>):** 3773, 3009, 2698, 2577, 1584, 1272, 1125, 754; **HRMS m/z (ESI)** calculated for C<sub>12</sub>H<sub>15</sub>F<sub>2</sub>O<sub>3</sub> (M + H)<sup>+</sup> 245.0984, found 245.0984.

**(E)-1-(Benzyloxy)-2-(3,3-difluoroprop-1-en-1-yl)benzene**

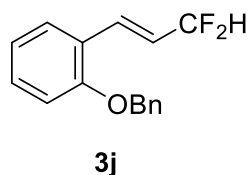

Following the general procedure, the reaction of **1j** (55.6 mg, 0.20 mmol, 1.0 equiv.), CuCl (2.0 mg, 0.02 mmol, 10 mol%), **L1** (5.6 mg, 0.024 mmol, 12 mol%), NaO<sup>t</sup>Bu (38.4 mg, 0.4 mmol, 2.0 equiv.), B<sub>2</sub>pin<sub>2</sub> **2a** (50.8 mg, 0.2 mmol, 1.0 equiv.), MeOH (12.8 mg, 0.4 mmol, 2.0 equiv.), and MeCN (2 mL) under Ar atmosphere. The reaction mixture was stirred at 45 °C for 24 hours after column chromatography on silica afford **3j** (39.4 mg, 76%) as a yellow oil: **<sup>1</sup>H NMR (400 MHz, CDCl<sub>3</sub>)** δ 7.58 – 7.16 (m, 8H), 7.06 – 6.89 (m, 2H), 6.45 – 6.02 (m, 2H), 5.11 (s, 2H). **<sup>13</sup>C NMR (101 MHz, CDCl<sub>3</sub>)** δ 156.8, 136.8, 132.5 (t, *J* = 12.7 Hz), 130.7, 128.8, 128.2, 128.0, 127.5, 123.9, 121.7 (t, *J* = 24.2 Hz), 116.2 (t, *J* = 232.9 Hz), 112.7, 111.8, 70.6. **<sup>19</sup>F NMR (377 MHz, CDCl<sub>3</sub>)** δ -108.66. **ATR-FTIR (cm<sup>-1</sup>):** 3354, 2985, 2600, 1452, 1280, 1116, 874, 754; **HRMS m/z (ESI)** calculated for C<sub>16</sub>H<sub>15</sub>F<sub>2</sub>O (M + H)<sup>+</sup> 261.1085, found 261.1080.

**(E)-1-(3,3-Difluoroprop-1-en-1-yl)-4-phenoxybenzene**

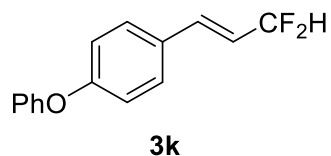

Following the general procedure, the reaction of **1k** (52.8 mg, 0.20 mmol, 1.0 equiv.), CuCl (2.0 mg, 0.02 mmol, 10 mol%), **L1** (5.6 mg, 0.024 mmol, 12 mol%), NaO<sup>t</sup>Bu (38.4 mg, 0.4 mmol, 2.0 equiv.), B<sub>2</sub>pin<sub>2</sub> **2a** (50.8 mg, 0.2 mmol, 1.0 equiv.), MeOH (12.8 mg, 0.4 mmol, 2.0 equiv.), and MeCN (2 mL) under Ar atmosphere. The reaction mixture was stirred at 45 °C for 24 hours after column chromatography on silica afford **3k** (40.6 mg, 83%) as a white solid: <sup>1</sup>H NMR (400 MHz, CDCl<sub>3</sub>) δ 7.52 – 7.32 (m, 4H), 7.20 – 7.12 (m, 1H), 7.12 – 6.92 (m, 4H), 6.89 – 6.80 (m, 1H), 6.42 – 6.04 (m, 2H). <sup>13</sup>C NMR (101 MHz, CDCl<sub>3</sub>) δ 158.7, 156.6, 136.5 (t, *J* = 12.2 Hz), 130.0, 129.4, 128.9, 124.0, 120.0 (t, *J* = 24.0 Hz), 119.6, 118.7, 115.7 (t, *J* = 234.0 Hz). <sup>19</sup>F NMR (377 MHz, CDCl<sub>3</sub>) δ -109.20. ATR-FTIR (cm<sup>-1</sup>): 3321, 2986, 2604, 1970, 1452, 1281, 1116, 714; HRMS *m/z* (ESI) calculated for C<sub>15</sub>H<sub>13</sub>F<sub>2</sub>O (M + H)<sup>+</sup> 247.0929, found 247.0929.

**(E)-5-(3,3-Difluoroprop-1-en-1-yl)benzo[d][1,3]dioxole**

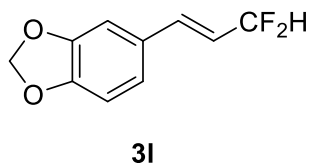

Following the general procedure, the reaction of **1l** (43.2 mg, 0.20 mmol, 1.0 equiv.), CuCl (2.0 mg, 0.02 mmol, 10 mol%), **L1** (5.6 mg, 0.024 mmol, 12 mol%), NaO<sup>t</sup>Bu (38.4 mg, 0.4 mmol, 2.0 equiv.), B<sub>2</sub>pin<sub>2</sub> **2a** (50.8 mg, 0.2 mmol, 1.0 equiv.), MeOH (12.8 mg, 0.4 mmol, 2.0 equiv.), and MeCN (2 mL) under Ar atmosphere. The reaction mixture was stirred at 45 °C for 24 hours after column chromatography on silica afford **3l** (35.6 mg, 92%) as a colorless oil: <sup>1</sup>H NMR (500 MHz, CDCl<sub>3</sub>) δ 6.96 (d, *J* = 1.5 Hz, 1H), 6.89 (d, *J* = 8.0 Hz, 1H), 6.82 – 6.74 (m, 2H), 6.35 – 6.03 (m, 2H), 5.99 (s, 2H). <sup>13</sup>C NMR (126 MHz, CDCl<sub>3</sub>) δ 148.9, 148.4, 136.9 (t, *J* = 12.3 Hz), 128.9, 122.9, 119.2 (t, *J* = 24.0 Hz), 115.7 (t, *J* = 233.7 Hz), 108.6, 106.2, 101.6. <sup>19</sup>F NMR (471 MHz, CDCl<sub>3</sub>) δ -108.98. ATR-FTIR (cm<sup>-1</sup>): 3009, 2697, 2155, 1550, 1268, 1137, 967, 755; HRMS *m/z* (ESI) calculated for C<sub>10</sub>H<sub>9</sub>F<sub>2</sub>O<sub>2</sub> (M + H)<sup>+</sup> 199.0565, found 199.0564.

**(E)-4-(3,3-Difluoroprop-1-en-1-yl)-N,N-dimethylaniline**

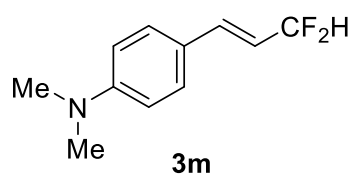

Following the general procedure, the reaction of **1m** (43.0 mg, 0.20 mmol, 1.0 equiv.), CuCl (2.0 mg, 0.02 mmol, 10 mol%), **L1** (5.6 mg, 0.024 mmol, 12 mol%), NaO<sup>t</sup>Bu (38.4 mg, 0.4 mmol, 2.0 equiv.), B<sub>2</sub>pin<sub>2</sub> **2a** (50.8 mg, 0.2 mmol, 1.0 equiv.), MeOH (12.8 mg, 0.4 mmol, 2.0 equiv.), and MeCN (2 mL) under Ar atmosphere. The reaction mixture was stirred at 45 °C for 24 hours after column chromatography on silica afford **3m** (15.4 mg, 39%) as a yellow solid: **<sup>1</sup>H NMR (400 MHz, CDCl<sub>3</sub>)** δ 7.34 (d, *J* = 9.6 Hz, 2H), 6.77 (dt, *J* = 16.0, 3.2 Hz, 1H), 6.73 – 6.64 (m, 2H), 6.42 – 5.91 (m, 2H), 3.00 (s, 6H). **<sup>13</sup>C NMR (101 MHz, CDCl<sub>3</sub>)** δ 151.2, 137.4 (t, *J* = 12.4 Hz), 128.5, 114.2, 118.8 (t, *J* = 358.0 Hz), 116.1 (t, *J* = 23.9 Hz), 112.0, 40.3. **<sup>19</sup>F NMR (376 MHz, CDCl<sub>3</sub>)** δ -107.30. **ATR-FTIR (cm<sup>-1</sup>):** 3781, 3008, 2694, 2128, 1468, 1265, 964, 731; **HRMS m/z (ESI)** calculated for C<sub>11</sub>H<sub>14</sub>F<sub>2</sub>N (M + H)<sup>+</sup> 198.1089, found 198.1084.

#### **(E)-1-(3,3-Difluoroprop-1-en-1-yl)-4-fluorobenzene**

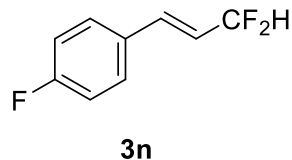

Following the general procedure, the reaction of **1n** (38 mg, 0.20 mmol, 1.0 equiv.), CuCl (2.0 mg, 0.02 mmol, 10 mol%), **L1** (5.6 mg, 0.024 mmol, 12 mol%), NaO<sup>t</sup>Bu (38.4 mg, 0.4 mmol, 2.0 equiv.), B<sub>2</sub>pin<sub>2</sub> **2a** (50.8 mg, 0.2 mmol, 1.0 equiv.), MeOH (12.8 mg, 0.4 mmol, 2.0 equiv.), and MeCN (2 mL) under Ar atmosphere. The reaction mixture was stirred at 45 °C for 24 hours after column chromatography on silica afford **3n** (14.6 mg, 42%) as a colorless oil: **<sup>1</sup>H NMR (500 MHz, CDCl<sub>3</sub>)** δ 7.51 – 7.37 (m, 2H), 7.19 – 7.02 (m, 2H), 6.85 (dt, *J* = 16.2, 3.5 Hz, 1H), 6.38 – 6.09 (m, 2H). **<sup>13</sup>C NMR (126 MHz, CDCl<sub>3</sub>)** δ 163.5 (d, *J* = 249.6 Hz), 136.0 (t, *J* = 12.2 Hz), 130.8, 129.1 (d, *J* = 8.2 Hz), 120.9 (td, *J* = 24.0, 2.3 Hz), 116.0 (d, *J* = 21.9 Hz), 115.4 (t, *J* = 234.2 Hz). **<sup>19</sup>F NMR (471 MHz, CDCl<sub>3</sub>)** δ -109.77, -111.37. **ATR-FTIR (cm<sup>-1</sup>):** 3066, 2574, 2154, 1733, 1474, 1277, 938, 734; **HRMS m/z (ESI)** calculated for C<sub>9</sub>H<sub>8</sub>F<sub>3</sub> (M + H)<sup>+</sup> 173.0573, found 173.0573.

**(E)-4-(3,3-Difluoroprop-1-en-1-yl)-2-fluoro-1-methoxybenzene**

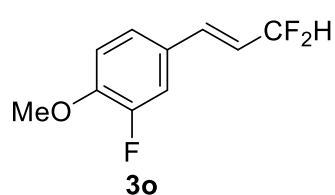

Following the general procedure, the reaction of **1o** (44.0 mg, 0.20 mmol, 1.0 equiv.), CuCl (2.0 mg, 0.02 mmol, 10 mol%), **L1** (5.6 mg, 0.024 mmol, 12 mol%), NaO<sup>t</sup>Bu (38.4 mg, 0.4 mmol, 2.0 equiv.), B<sub>2</sub>pin<sub>2</sub> **2a** (50.8 mg, 0.2 mmol, 1.0 equiv.), MeOH (12.8 mg, 0.4 mmol, 2.0 equiv.), and MeCN (2 mL) under Ar atmosphere. The reaction mixture was stirred at 45 °C for 24 hours after column chromatography on silica afford **3o** (33.0 mg, 82%) as a yellow soild: **<sup>1</sup>H NMR (400 MHz, CDCl<sub>3</sub>)** δ 7.25 – 7.17 (m, 1H), 7.14 (d, *J* = 8.8 Hz, 1H), 6.94 (t, *J* = 8.4 Hz, 1H), 6.84 – 6.69 (m, 1H), 6.38 – 6.05 (m, 2H), 3.91 (s, 3H). **<sup>13</sup>C NMR (101 MHz, CDCl<sub>3</sub>)** δ 152.6 (d, *J* = 248.5 Hz), 148.8 (d, *J* = 11.2 Hz), 135.8 (td, *J* = 12.2, 2.2 Hz), 127.9 (d, *J* = 6.4 Hz), 124.2 (d, *J* = 3.3 Hz), 120.2 (t, *J* = 24.0 Hz), 115.4 (t, *J* = 234.5 Hz) 114.3 (d, *J* = 18.9 Hz), 113.37 (d, *J* = 2.0 Hz), 56.4. **<sup>19</sup>F NMR (377 MHz, CDCl<sub>3</sub>)** δ -109.54, -134.58. **ATR-FTIR (cm<sup>-1</sup>):** 3361, 3074, 2590, 1972, 1518, 1315, 1062, 755; **HRMS m/z (ESI)** calculated for C<sub>10</sub>H<sub>10</sub>F<sub>3</sub>O (M + H)<sup>+</sup> 203.0678, found 203.0678.

**(E)-1-Chloro-4-(3,3-difluoroprop-1-en-1-yl)benzene**

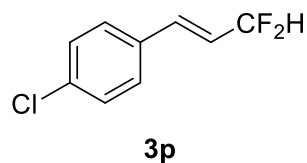

Following the general procedure, the reaction of **1p** (41.2 mg, 0.20 mmol, 1.0 equiv.), CuCl (2.0 mg, 0.02 mmol, 10 mol%), **L1** (5.6 mg, 0.024 mmol, 12 mol%), NaO<sup>t</sup>Bu (38.4 mg, 0.4 mmol, 2.0 equiv.), B<sub>2</sub>pin<sub>2</sub> **2a** (50.8 mg, 0.2 mmol, 1.0 equiv.), MeOH (12.8 mg, 0.4 mmol, 2.0 equiv.), and MeCN (2 mL) under Ar atmosphere. The reaction mixture was stirred at 45 °C for 24 hours after column chromatography on silica afford **3p** (17.5 mg, 47%) as a colorless oil: **<sup>1</sup>H NMR (400 MHz, CDCl<sub>3</sub>)** δ 7.43 – 7.32 (m, 4H), 6.90 – 6.76 (m, 1H), 6.45 – 6.07 (m, 2H). **<sup>13</sup>C NMR (101 MHz, CDCl<sub>3</sub>)** δ 135.9 (t, *J* = 12.0 Hz), 135.4, 133.1, 129.2, 128.6, 121.7 (t, *J* = 24.0 Hz), 115.2 (t, *J* = 235.0 Hz). **<sup>19</sup>F NMR (377 MHz, CDCl<sub>3</sub>)** δ -110.17. **ATR-FTIR (cm<sup>-1</sup>):** 3008, 2696, 2155, 1971, 1467, 1266, 908, 697; **HRMS m/z (ESI)** calculated for C<sub>9</sub>H<sub>8</sub>ClF<sub>2</sub> (M + H)<sup>+</sup> 245.1136, found

245.1136.

**(E)-2-Chloro-4-(3,3-difluoroprop-1-en-1-yl)-1-methoxybenzene**

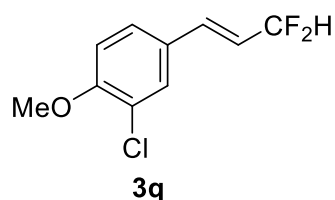

Following the general procedure, the reaction of **1q** (47.2 mg, 0.20 mmol, 1.0 equiv.), CuCl (2.0 mg, 0.02 mmol, 10 mol%), **L1** (5.6 mg, 0.024 mmol, 12 mol%), NaO<sup>t</sup>Bu (38.4 mg, 0.4 mmol, 2.0 equiv.), B<sub>2</sub>pin<sub>2</sub> **2a** (50.8 mg, 0.2 mmol, 1.0 equiv.), MeOH (12.8 mg, 0.4 mmol, 2.0 equiv.), and MeCN (2 mL) under Ar atmosphere. The reaction mixture was stirred at 45 °C for 24 hours after column chromatography on silica afford **3q** (28.8 mg, 66%) as a white solid: **<sup>1</sup>H NMR (400 MHz, CDCl<sub>3</sub>)** δ 7.47 (d, *J* = 2.4 Hz, 1H), 7.29 (dd, *J* = 8.5, 2.0 Hz, 1H), 6.91 (d, *J* = 8.4 Hz, 1H), 6.76 (dt, *J* = 7.7, 3.2 Hz, 1H), 6.38 – 6.05 (m, 2H), 3.92 (s, 3H). **<sup>13</sup>C NMR (101 MHz, CDCl<sub>3</sub>)** δ 156.0, 135.5 (t, *J* = 12.3 Hz), 128.9, 128.1, 127.2, 123.1, 120.2 (t, *J* = 24.0 Hz), 115.4 (t, *J* = 234.6 Hz), 112.1, 56.4. **<sup>19</sup>F NMR (377 MHz, CDCl<sub>3</sub>)** δ -109.53. **ATR-FTIR (cm<sup>-1</sup>):** 3361, 3012, 2433, 1502, 1269, 1063, 1014, 755; **HRMS m/z (ESI)** calculated for C<sub>10</sub>H<sub>10</sub>ClF<sub>2</sub>O (M + H)<sup>+</sup> 219.0383, found 213.0377.

**(E)-1,2-Dichloro-4-(3,3-difluoroprop-1-en-1-yl)benzene**

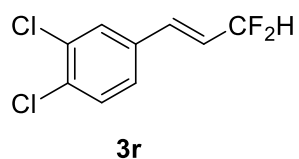

Following the general procedure, the reaction of **1r** (48.0 mg, 0.20 mmol, 1.0 equiv.), CuCl (2.0 mg, 0.02 mmol, 10 mol%), **L1** (5.6 mg, 0.024 mmol, 12 mol%), NaO<sup>t</sup>Bu (38.4 mg, 0.4 mmol, 2.0 equiv.), B<sub>2</sub>pin<sub>2</sub> **2a** (50.8 mg, 0.2 mmol, 1.0 equiv.), MeOH (12.8 mg, 0.4 mmol, 2.0 equiv.), and MeCN (2 mL) under Ar atmosphere. The reaction mixture was stirred at 45 °C for 24 hours after column chromatography on silica afford **3r** (20.8 mg, 47%) as a colorless oil: **<sup>1</sup>H NMR (500 MHz, CDCl<sub>3</sub>)** δ 7.47 (s, 1H), 7.39 (d, *J* = 8.5 Hz, 1H), 7.22 (d, *J* = 8.5 Hz, 1H), 6.77 – 6.71 (m, 1H), 6.32 – 6.07 (m, 2H). **<sup>13</sup>C NMR (126 MHz, CDCl<sub>3</sub>)** δ 134.6 (t, *J* = 12.0 Hz), 131.0, 129.1, 126.4, 123.0 (t, *J* = 24.0 Hz), 114.7 (t, *J* = 235.1 Hz), 100.1. **<sup>19</sup>F NMR (471 MHz, CDCl<sub>3</sub>)** δ -110.87. **ATR-FTIR (cm<sup>-1</sup>):** 3009, 2698, 1973, 1550, 1269, 1133, 970, 755; **HRMS m/z (ESI)** calculated

for  $C_9H_7Cl_2F_2$  ( $M + H$ )<sup>+</sup> 222.9887, found 222.9890.

### (*E*)-1-Bromo-4-(3,3-difluoroprop-1-en-1-yl)benzene

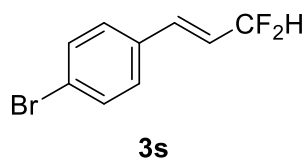

Following the general procedure, the reaction of **1s** (50.0 mg, 0.20 mmol, 1.0 equiv.), CuCl (2.0 mg, 0.02 mmol, 10 mol%), **L1** (5.6 mg, 0.024 mmol, 12 mol%), NaO<sup>t</sup>Bu (38.4 mg, 0.4 mmol, 2.0 equiv.), B<sub>2</sub>pin<sub>2</sub> **2a** (50.8 mg, 0.2 mmol, 1.0 equiv.), MeOH (12.8 mg, 0.4 mmol, 2.0 equiv.), and MeCN (2 mL) under Ar atmosphere. The reaction mixture was stirred at 45 °C for 24 hours after column chromatography on silica afford **3s** (26.1 mg, 56%) as a white solid: <sup>1</sup>H NMR (500 MHz, CDCl<sub>3</sub>) δ 7.50 (d, *J* = 8.5 Hz, 2H), 7.30 (d, *J* = 8.5 Hz, 2H), 6.99 – 6.63 (m, 1H), 6.48 – 5.94 (m, 2H). <sup>13</sup>C NMR (126 MHz, CDCl<sub>3</sub>) δ 135.9 (t, *J* = 12.1 Hz), 133.5, 132.2, 128.9, 123.7, 121.8 (t, *J* = 24.0 Hz), 115.1 (t, *J* = 234.2 Hz). <sup>19</sup>F NMR (471 MHz, CDCl<sub>3</sub>) δ -110.28. ATR-FTIR (cm<sup>-1</sup>): 3008, 2693, 2156, 1465, 1265, 1139, 967, 731; HRMS *m/z* (ESI) calculated for C<sub>9</sub>H<sub>8</sub>BrF<sub>2</sub> ( $M + H$ )<sup>+</sup> 232.9772, found 232.9771.

### (*E*)-1-Bromo-3-(3,3-difluoroprop-1-en-1-yl)benzene

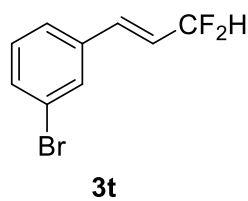

Following the general procedure, the reaction of **1t** (50 mg, 0.20 mmol, 1.0 equiv.), CuCl (2.0 mg, 0.02 mmol, 10 mol%), **L1** (5.6 mg, 0.024 mmol, 12 mol%), NaO<sup>t</sup>Bu (38.4 mg, 0.4 mmol, 2.0 equiv.), B<sub>2</sub>pin<sub>2</sub> **2a** (50.8 mg, 0.2 mmol, 1.0 equiv.), MeOH (12.8 mg, 0.4 mmol, 2.0 equiv.), and MeCN (2 mL) under Ar atmosphere. The reaction mixture was stirred at 45 °C for 24 hours after column chromatography on silica afford **3t** (34.8 mg, 75%) as a colorless oil: <sup>1</sup>H NMR (500 MHz, CDCl<sub>3</sub>) δ 7.59 (s, 1H), 7.47 (d, *J* = 8.0 Hz, 1H), 7.36 (d, *J* = 8.0 Hz, 1H), 7.24 (t, *J* = 8.0 Hz, 1H), 6.88 – 6.76 (m, 1H), 6.41 – 6.06 (m, 2H). <sup>13</sup>C NMR (126 MHz, CDCl<sub>3</sub>) δ 136.7, 135.6 (t, *J* = 12.1 Hz), 132.4, 130.5, 130.2, 126.0, 122.8 (t, *J* = 38.6 Hz), 122.6, 114.9 (t, *J* = 234.9 Hz). <sup>19</sup>F NMR (471 MHz, CDCl<sub>3</sub>) δ -110.58. ATR-FTIR (cm<sup>-1</sup>): 3008, 2573, 2155, 1471, 1265,

967, 763, 698; **HRMS m/z (ESI)** calculated for C<sub>9</sub>H<sub>8</sub>BrF<sub>2</sub> (M + H)<sup>+</sup> 232.9772, found 232.9767.

**(E)-1-Bromo-2-(3,3-difluoroprop-1-en-1-yl)-4-methoxybenzene**

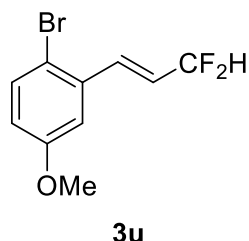

Following the general procedure, the reaction of **1u** (56.0 mg, 0.20 mmol, 1.0 equiv.), CuCl (2.0 mg, 0.02 mmol, 10 mol%), **L1** (5.6 mg, 0.024 mmol, 12 mol%), NaO<sup>t</sup>Bu (38.4 mg, 0.4 mmol, 2.0 equiv.), B<sub>2</sub>pin<sub>2</sub> **2a** (50.8 mg, 0.2 mmol, 1.0 equiv.), MeOH (12.8 mg, 0.4 mmol, 2.0 equiv.), and MeCN (2 mL) under Ar atmosphere. The reaction mixture was stirred at 45 °C for 24 hours after column chromatography on silica afford **3u** (17.8 mg, 34%) as a colorless oil: **<sup>1</sup>H NMR (400 MHz, CDCl<sub>3</sub>)** δ 7.54 (d, *J* = 2.4 Hz, 1H), 7.40 (dd, *J* = 8.8, 2.4 Hz, 1H), 7.10 (dt, *J* = 15.8, 3.6 Hz, 1H), 6.78 (d, *J* = 8.8 Hz, 1H), 6.48 – 6.00 (m, 2H), 3.85 (s, 3H). **<sup>13</sup>C NMR (101 MHz, CDCl<sub>3</sub>)** δ 156.7, 133.1, 131.2 (t, *J* = 12.6 Hz), 130.6, 125.5, 122.9 (t, *J* = 24.1 Hz), 115.7 (t, *J* = 233.7 Hz), 113.2, 112.9, 55.9. **<sup>19</sup>F NMR (377 MHz, CDCl<sub>3</sub>)** δ -109.58. **ATR-FTIR (cm<sup>-1</sup>):** 3009, 2699, 1552, 1465, 1269, 1145, 972, 755; **HRMS m/z (ESI)** calculated for C<sub>10</sub>H<sub>10</sub>BrF<sub>2</sub>O (M + H)<sup>+</sup> 262.9878 found 262.9876.

**(E)-1-(3,3-Difluoroprop-1-en-1-yl)-4-iodobenzene**

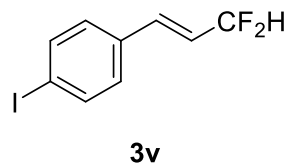

Following the general procedure, the reaction of **1v** (59.6 mg, 0.20 mmol, 1.0 equiv.), CuCl (2.0 mg, 0.02 mmol, 10 mol%), **L1** (5.6 mg, 0.024 mmol, 12 mol%), NaO<sup>t</sup>Bu (38.4 mg, 0.4 mmol, 2.0 equiv.), B<sub>2</sub>pin<sub>2</sub> **2a** (50.8 mg, 0.2 mmol, 1.0 equiv.), MeOH (12.8 mg, 0.4 mmol, 2.0 equiv.), and MeCN (2 mL) under Ar atmosphere. The reaction mixture was stirred at 45 °C for 24 hours after column chromatography on silica afford **3v** (24.9 mg, 44%) as a white solid: **<sup>1</sup>H NMR (400 MHz, CDCl<sub>3</sub>)** δ 7.71 (d, *J* = 8.4 Hz, 2H), 7.17 (d, *J* = 8.4 Hz, 2H), 6.86 – 6.72 (m, 1H), 6.48 – 6.02 (m, 2H). **<sup>13</sup>C NMR (101 MHz, CDCl<sub>3</sub>)** δ 138.0, 135.9 (t, *J* = 12.1 Hz), 133.9, 128.8, 121.8 (t, *J* = 24.0 Hz), 115.0 (t, *J*

= 235.1 Hz), 95.3.  $^{19}\text{F}$  NMR (377 MHz,  $\text{CDCl}_3$ )  $\delta$  -110.33. ATR-FTIR ( $\text{cm}^{-1}$ ): 3073, 2701, 2155, 1910, 1662, 1401, 1137, 756; HRMS  $m/z$  (ESI) calculated for  $\text{C}_9\text{H}_8\text{F}_2\text{I}$  ( $\text{M} + \text{H}$ ) $^+$  280.9633, found 280.9625.

#### (E)-2-(3,3-Difluoroprop-1-en-1-yl)naphthalene

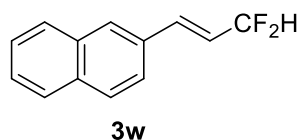

Following the general procedure, the reaction of **1w** (44.4 mg, 0.20 mmol, 1.0 equiv.),  $\text{CuCl}$  (2.0 mg, 0.02 mmol, 10 mol%), **L1** (5.6 mg, 0.024 mmol, 12 mol%),  $\text{NaO}^t\text{Bu}$  (38.4 mg, 0.4 mmol, 2.0 equiv.),  $\text{B}_2\text{pin}_2$  **2a** (50.8 mg, 0.2 mmol, 1.0 equiv.),  $\text{MeOH}$  (12.8 mg, 0.4 mmol, 2.0 equiv.), and  $\text{MeCN}$  (2 mL) under Ar atmosphere. The reaction mixture was stirred at 45 °C for 24 hours after column chromatography on silica afford **3w** (20.7 mg, 51%) as a white solid:  $^1\text{H}$  NMR (400 MHz,  $\text{CDCl}_3$ )  $\delta$  7.90 – 7.81 (m, 4H), 7.66 – 7.60 (m, 1H), 7.57 – 7.48 (m, 2H), 7.04 (m, 1H), 6.52 – 6.08 (m, 2H).  $^{13}\text{C}$  NMR (101 MHz,  $\text{CDCl}_3$ )  $\delta$  137.3 (t,  $J$  = 12.4 Hz), 133.9, 133.4, 132.0, 128.8, 128.5, 128.4, 127.9, 127.0, 126.8, 123.4, 121.3 (t,  $J$  = 24.1 Hz), 115.6 (t,  $J$  = 234.4 Hz).  $^{19}\text{F}$  NMR (376 MHz,  $\text{CDCl}_3$ )  $\delta$  -109.54. ATR-FTIR ( $\text{cm}^{-1}$ ): 3008, 2694, 2155, 1971, 1549, 1265, 1147, 963; HRMS  $m/z$  (ESI) calculated for  $\text{C}_{13}\text{H}_{11}\text{F}_2$  ( $\text{M} + \text{H}$ ) $^+$  205.0823, found 205.0823.

#### (E)-2-(3,3-Difluoroprop-1-en-1-yl)-6-methoxynaphthalene

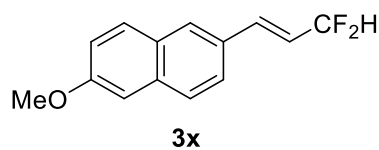

Following the general procedure, the reaction of **1x** (50.4 mg, 0.20 mmol, 1.0 equiv.),  $\text{CuCl}$  (2.0 mg, 0.02 mmol, 10 mol%), **L1** (5.6 mg, 0.024 mmol, 12 mol%),  $\text{NaO}^t\text{Bu}$  (38.4 mg, 0.4 mmol, 2.0 equiv.),  $\text{B}_2\text{pin}_2$  **2a** (50.8 mg, 0.2 mmol, 1.0 equiv.),  $\text{MeOH}$  (12.8 mg, 0.4 mmol, 2.0 equiv.), and  $\text{MeCN}$  (2 mL) under Ar atmosphere. The reaction mixture was stirred at 45 °C for 24 hours after column chromatography on silica afford **3x** (35.6 mg, 76%) as a white solid:  $^1\text{H}$  NMR (400 MHz,  $\text{CDCl}_3$ )  $\delta$  7.83 – 7.69 (m, 3H), 7.57 (dd,  $J$  = 8.6, 1.7 Hz, 1H), 7.17 (dd,  $J$  = 8.9, 2.5 Hz, 1H), 7.13 (d,  $J$  = 2.4 Hz, 1H), 7.00 (dt,  $J$  = 7.0, 4.3 Hz, 1H), 6.50 – 6.05 (m, 2H), 3.93 (s, 3H).  $^{13}\text{C}$  NMR (101 MHz,  $\text{CDCl}_3$ )  $\delta$  158.6, 137.4 (t,  $J$  = 12.2 Hz), 135.3, 130.0, 129.9, 128.8,



128.3, 127.6, 124.1, 120.3 (t,  $J = 23.9$  Hz), 119.6, 115.8 (t,  $J = 233.4$  Hz), 106.1, 55.5.  $^{19}\text{F}$  NMR (377 MHz,  $\text{CDCl}_3$ )  $\delta$  -109.10. ATR-FTIR ( $\text{cm}^{-1}$ ): 3008, 2694, 2155, 1549, 1265, 1147, 963, 731; HRMS  $m/z$  (ESI) calculated for  $\text{C}_{14}\text{H}_{13}\text{F}_2\text{O}$  ( $\text{M} + \text{H}$ ) $^+$  235.0929, found 235.0924.

**(E)-4-(4,4-Difluorobut-2-en-2-yl)-1,1'-biphenyl**

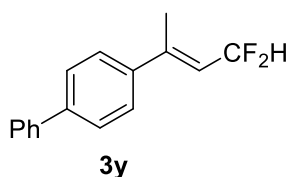

Following the general procedure, the reaction of **1y** (52.4 mg, 0.20 mmol, 1.0 equiv.),  $\text{CuCl}$  (2.0 mg, 0.02 mmol, 10 mol%), **L1** (5.6 mg, 0.024 mmol, 12 mol%),  $\text{NaO}^t\text{Bu}$  (38.4 mg, 0.4 mmol, 2.0 equiv.),  $\text{B}_2\text{pin}_2$  **2a** (50.8 mg, 0.2 mmol, 1.0 equiv.),  $\text{MeOH}$  (12.8 mg, 0.4 mmol, 2.0 equiv.), and  $\text{MeCN}$  (2 mL) under Ar atmosphere. The reaction mixture was stirred at 45 °C for 24 hours after column chromatography on silica afford **3y** (18.9 mg, 39%) as a white solid:  $^1\text{H}$  NMR (400 MHz,  $\text{CDCl}_3$ )  $\delta$  7.64 – 7.59 (m, 4H), 7.55 – 7.50 (m, 2H), 7.49 – 7.44 (m, 2H), 7.41 – 7.35 (m, 1H), 6.56 (td,  $J = 56.0, 6.5$  Hz, 1H), 6.03 – 5.95 (m, 1H), 2.24 (td,  $J = 2.9, 1.2$  Hz, 3H).  $^{13}\text{C}$  NMR (101 MHz,  $\text{CDCl}_3$ )  $\delta$  144.7 (t,  $J = 12.6$  Hz), 141.6, 140.5, 139.9, 129.0, 127.7, 127.3, 127.2, 126.5, 120.2 (t,  $J = 25.9$  Hz), 113.1 (t,  $J = 231.8$  Hz), 16.6.  $^{19}\text{F}$  NMR (377 MHz,  $\text{CDCl}_3$ )  $\delta$  -109.37. ATR-FTIR ( $\text{cm}^{-1}$ ): 3008, 2697, 2155, 1549, 1265, 1149, 763, 698; HRMS  $m/z$  (ESI) calculated for  $\text{C}_{16}\text{H}_{15}\text{F}_2$  ( $\text{M} + \text{H}$ ) $^+$  245.1136, found 245.0037.

## 4. Gram-Sale Synthesis

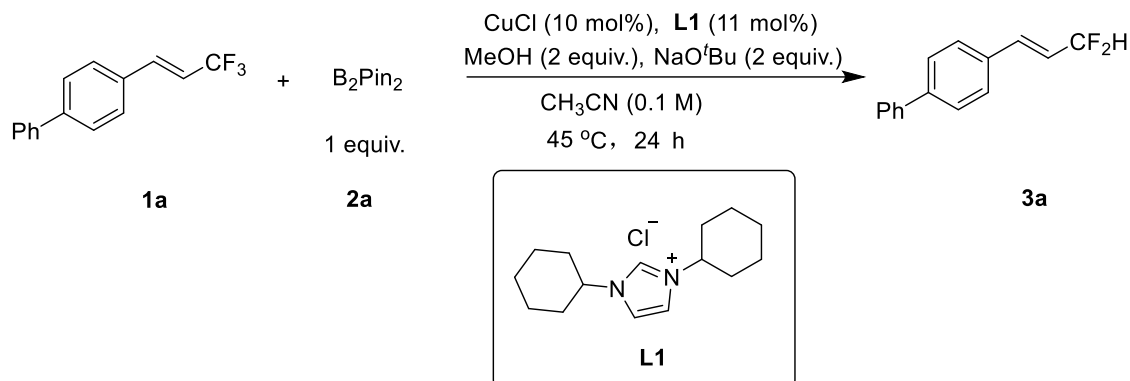

To a 200 mL Schlenk tube was added trifluoromethyl alkenes **1a** (2.48 g, 10 mmol, 1.0 equiv.), CuCl (99.0 mg, 1.0 mmol, 10 mol%), **L1** (295.0 mg, 1.1 mmol, 11 mol%), NaO<sup>t</sup>Bu (1.92 g, 20 mmol, 2.0 equiv.), B<sub>2</sub>pin<sub>2</sub> **2a** (2.54 g, 10 mmol, 1.0 equiv.), MeOH (810  $\mu$ l, 20 mmol, 2.0 equiv), and MeCN (50 mL) under Ar atmosphere. The reaction mixture was stirred at 45 °C for 48 hours. The solution was then cooled to room temperature and the solvent was removed under vacuum directly. The crude products were purified by column chromatography on silica gel to afford the pure products **3a** as a white solid (74%, 1.70 g).

## 5. Synthetic Application.

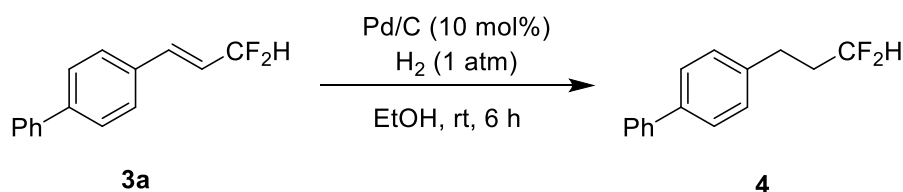

To the difluoromethyl compounds **3a** (46.0 mg, 0.2 mmol, 1.0 equiv.) in ethanol (5 mL), was added palladium on activated carbon (5%, 0.1 equiv., 42.4 mg). The reaction solution was purged with hydrogen balloon for 15 minutes and then stirred for 6 hours under hydrogen balloon. The reaction was filtered over a short path of celite, concentrated in vacuum. The obtained crude mixture was purified by flash column chromatography to afford the final product **4** (44.1 mg, 95%) as a colorless liquid.<sup>2</sup>

#### 4-(3,3-Difluoropropyl)-1,1'-biphenyl

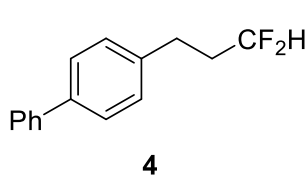

**<sup>1</sup>H NMR (500 MHz, CDCl<sub>3</sub>)** δ 7.68 – 7.51 (m, 4H), 7.51 – 7.44 (m, 2H), 7.41 – 7.35 (m, 1H), 7.30 (d, *J* = 8.0 Hz, 2H), 5.87 (tt, *J* = 56.5, 4.5 Hz, 1H), 2.90 – 2.82 (m, 2H), 2.29 – 2.15 (m, 2H). **<sup>13</sup>C NMR (126 MHz, CDCl<sub>3</sub>)** δ 141.0, 139.6, 139.1, 128.9, 128.9, 127.5, 127.3, 127.1, 116.8 (t, *J* = 239.1 Hz), 35.8 (t, *J* = 21.2 Hz), 28.2 (t, *J* = 6.2 Hz). **<sup>19</sup>F NMR (471 MHz, CDCl<sub>3</sub>)** δ -117.03. **ATR-FTIR (cm<sup>-1</sup>):** 3008, 2692, 2493, 1968, 1265, 1121, 908, 697; **HRMS m/z (ESI)** calculated for C<sub>15</sub>H<sub>14</sub>F<sub>2</sub> (M + H)<sup>+</sup> 233.1136, found 233.1136.

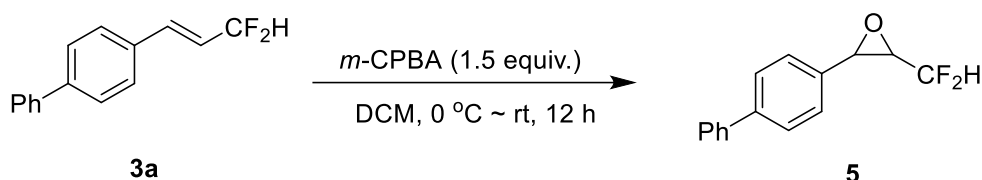

A solution of *m*-chloroperbenzoic acid (0.8 mmol, 4.0 equiv.) in DCM (2.0 mL) was added dropwise to a solution of product **3a** (0.2 mmol) in DCM (0.6 mL) at 0 °C. The solution was warmed to room temperature. After the reaction solution was stirred for 12 h, the reaction mixture was washed with 2.5 M NaOH for three times. The organic phase was dried over anhydrous sodium sulfate, concentrated under reduced pressure, and purified by column chromatography on silica gel to afford **5** (26.2 mg, 53%) as a colorless liquid.

#### 2-([1,1'-Biphenyl]-4-yl)-3-(difluoromethyl)oxirane

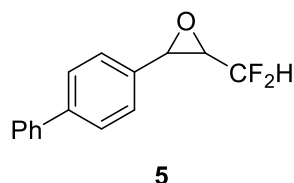

**<sup>1</sup>H NMR (500 MHz, CDCl<sub>3</sub>)** δ 7.68 – 7.53 (m, 4H), 7.51 – 7.42 (m, 2H), 7.40 – 7.32 (m, 3H), 5.77 (td, *J* = 55.0, 4.0 Hz, 1H), 4.07 (s, 1H), 3.55 – 3.24 (m, 1H). **<sup>13</sup>C NMR (126 MHz, CDCl<sub>3</sub>)** δ 142.1, 140.4, 133.5, 128.9, 127.6, 127.5, 127.1, 126.3, 113.7 (t, *J* = 242.0 Hz), 58.8 (t, *J* = 32.4 Hz), 54.7 (dd, *J* = 5.2, 3.8 Hz). **<sup>19</sup>F NMR (471 MHz, CDCl<sub>3</sub>)** δ -122.50, -123.14, -124.21, -124.85. **ATR-FTIR (cm<sup>-1</sup>):** 3015,

2694, 2155, 1971, 1459, 908, 763, 697; **HRMS m/z (ESI)** calculated for C<sub>15</sub>H<sub>14</sub>F<sub>2</sub>O<sub>2</sub> (M + H)<sup>+</sup> 265.1035, found 265.1027.

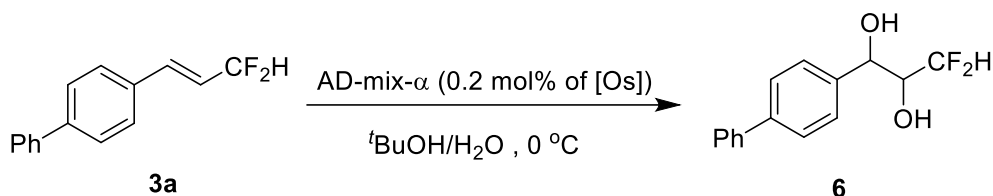

A solution of AD-mix- $\alpha$  (0.2 mol% of [Os]) in *t*BuOH and water mixture (2.5 mL, 1:1) was cooled to 0 °C and stirred for 5 min. The, **3a** (0.2 mmol) was added and the reaction mixture was stirred at 0 °C for 6 days. Solid sodium metabisulfite was added in 3 portions and stirred for 10 min. Water (50 mL) was then added to the above reaction and the mixture was extracted with Et<sub>2</sub>O (3 × 18 mL). The organic layer was combined and dried over Na<sub>2</sub>SO<sub>4</sub>. After concentration under vacuum, the residue was purified by flash chromatography on silica gel to get **6** (30.1 mg, 57%) as a colorless liquid.<sup>3</sup>

### 1-([1,1'-Biphenyl]-4-yl)-3,3-difluoropropane-1,2-diol

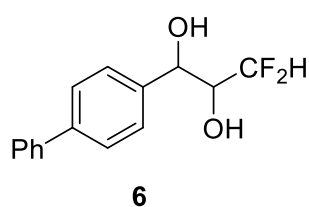

**<sup>1</sup>H NMR (500 MHz, CDCl<sub>3</sub>)**  $\delta$  7.65 – 7.57 (m, 4H), 7.50 – 7.41 (m, 4H), 7.41 – 7.31 (m, 1H), 5.96 – 5.56 (m, 1H), 4.94 (d,  $J$  = 4.0 Hz, 1H), 3.92 (ddd,  $J$  = 17.4, 8.1, 4.1 Hz, 1H), 2.81 (d,  $J$  = 28.5 Hz, 2H). **<sup>13</sup>C NMR (126 MHz, CDCl<sub>3</sub>)**  $\delta$  141.6, 140.6, 138.5, 129.0, 127.7, 127.6, 127.2, 127.0, 114.9 (t,  $J$  = 243.6 Hz), 74.9 (dd,  $J$  = 23.7, 21.4 Hz), 71.7 (t,  $J$  = 4.2 Hz). **<sup>19</sup>F NMR (471 MHz, CDCl<sub>3</sub>)**  $\delta$  -128.72, -129.33, -131.61, -132.23. **ATR-FTIR (cm<sup>-1</sup>):** 3015, 2694, 2155, 1971, 1459, 908, 763, 697; **HRMS m/z (ESI)** calculated for C<sub>15</sub>H<sub>14</sub>F<sub>2</sub>O<sub>2</sub> (M + H)<sup>+</sup> 265.1035, found 265.1024.

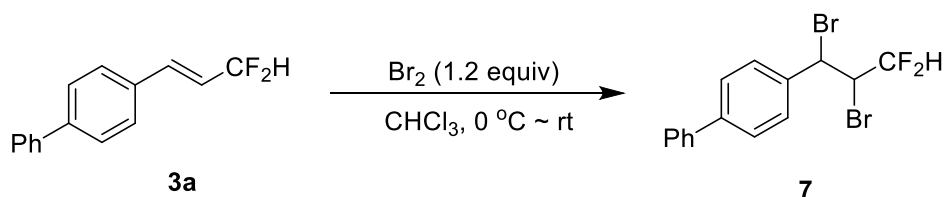

Bromine (160 mL, 3.05 mmol, 1.2 equiv.) was added dropwise to a stirred solution of t **3a** (300 mg, 2.54 mmol, 1 equiv) in CHCl<sub>3</sub> (8.5 mL, 0.5 M) at 0 °C under N<sub>2</sub> atmosphere. The reaction mixture was allowed to warm to room temperature after 5 minutes and then stirred for 2 hours. The reaction was quenched with saturated aqueous Na<sub>2</sub>S<sub>2</sub>O<sub>3</sub> (15 mL) and diluted with DCM (20 mL). After separation the organic phase, the residue was washed with H<sub>2</sub>O (20 mL) and brine (20 mL), dried over Na<sub>2</sub>SO<sub>4</sub>, and then concentrated under reduced pressure. Product **7** (49.7 mg, 64%) was obtained as a colorless liquid.<sup>4</sup>

#### 4-(1,2-Dibromo-3,3-difluoropropyl)-1,1'-biphenyl

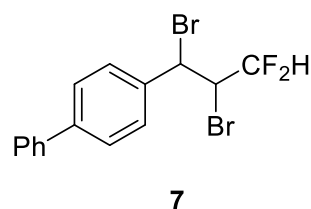

<sup>1</sup>H NMR (500 MHz, CDCl<sub>3</sub>) δ 7.65 – 7.59 (m, 4H), 7.49 – 7.43 (m, 4H), 7.41 – 7.35 (m, 1H), 6.39 (td, *J* = 55.6, 1.5 Hz, 1H), 5.15 (d, *J* = 11.1 Hz, 1H), 4.70 (dddd, *J* = 22.2, 11.1, 2.5, 1.6 Hz, 1H). <sup>13</sup>C NMR (126 MHz, CDCl<sub>3</sub>) δ 142.4, 140.2, 137.3, 129.0, 128.5, 128.0, 127.8, 127.3, 112.9 (t, *J* = 246.3 Hz), 53.1 (t, *J* = 22.3 Hz), 49.3 (d, *J* = 4.9 Hz). <sup>19</sup>F NMR (471 MHz, CDCl<sub>3</sub>) δ -116.97, -117.57, -128.98, -129.58. ATR-FTIR (cm<sup>-1</sup>): 3731, 3008, 1972, 1462, 1244, 914, 874, 684; HRMS *m/z* (ESI) calculated for C<sub>15</sub>H<sub>12</sub>Br<sub>2</sub>F<sub>2</sub> (M + H)<sup>+</sup> 388.9347, found 388.9359.

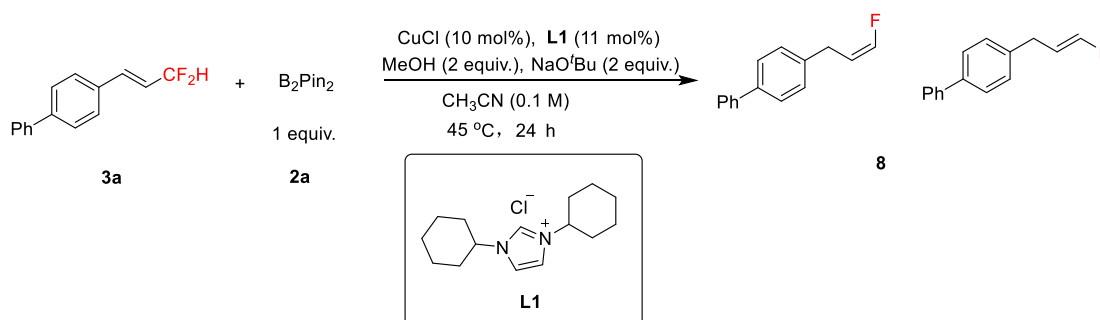

To a 25 mL Schlenk tube was added trifluoromethyl alkenes **3a** (0.20 mmol, 1.0 equiv), CuCl (2.0 mg, 0.02 mmol, 10 mol%), **L1** (63.4 mg, 0.024 mmol, 12 mol%), NaO'Bu (38.4 mg, 0.4 mmol, 2.0 equiv), B<sub>2</sub>pin<sub>2</sub> **2a** (157.2 mg, 0.2 mmol, 1.0 equiv), MeOH (8 mg, 0.4 mmol, 2.0 equiv), and MeCN (2 mL) under Ar atmosphere. The

reaction mixture was stirred at 45 °C for 24 hours. The solution was then cooled to rt and the solvent was removed under vacuum directly. The crude products were purified by column chromatography on silica gel to afford **8** (34.4 mg, 81%, *E/Z*=3:1) as a colorless liquid.

**(Z)-4-(3-Fluoroallyl)-1,1'-biphenyl and (E)-4-(3-fluoroallyl)-1,1'-biphenyl**

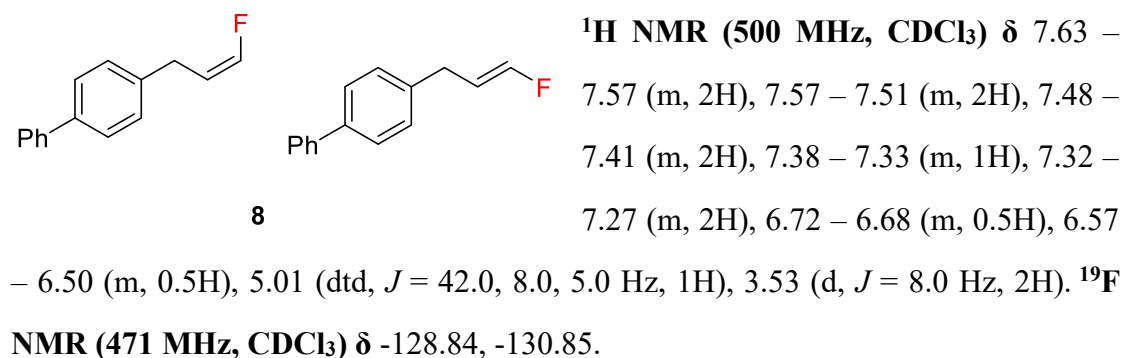

## 6. Control Experiments

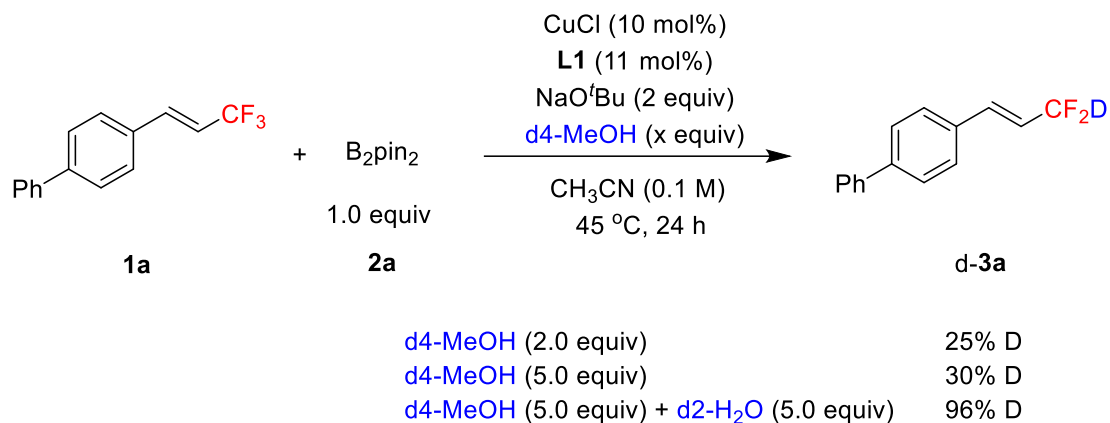

To a 25 mL Schlenk tube was added trifluoromethyl alkenes **3a** (0.20 mmol, 1.0 equiv.), CuCl (2.0 mg, 0.02 mmol, 10 mol%), **L1** (63.4 mg, 0.024 mmol, 12 mol%), NaO'Bu (38.4 mg, 0.4 mmol, 2.0 equiv.), B<sub>2</sub>pin<sub>2</sub> **2a** (157.2 mg, 0.2 mmol, 1.0 equiv.) d<sub>4</sub>-MeOH (8 mg, 0.4 mmol, 5.0 equiv.), d<sub>2</sub>-H<sub>2</sub>O (1.0 mmol, 5.0 equiv), and MeCN (2 mL) under Ar atmosphere. The reaction mixture was stirred at 45 °C for 24 hours. The solution was then cooled to room temperature and the solvent was removed under

vacuum directly. The crude products were purified by column chromatography on silica gel to afford **d-3a**.

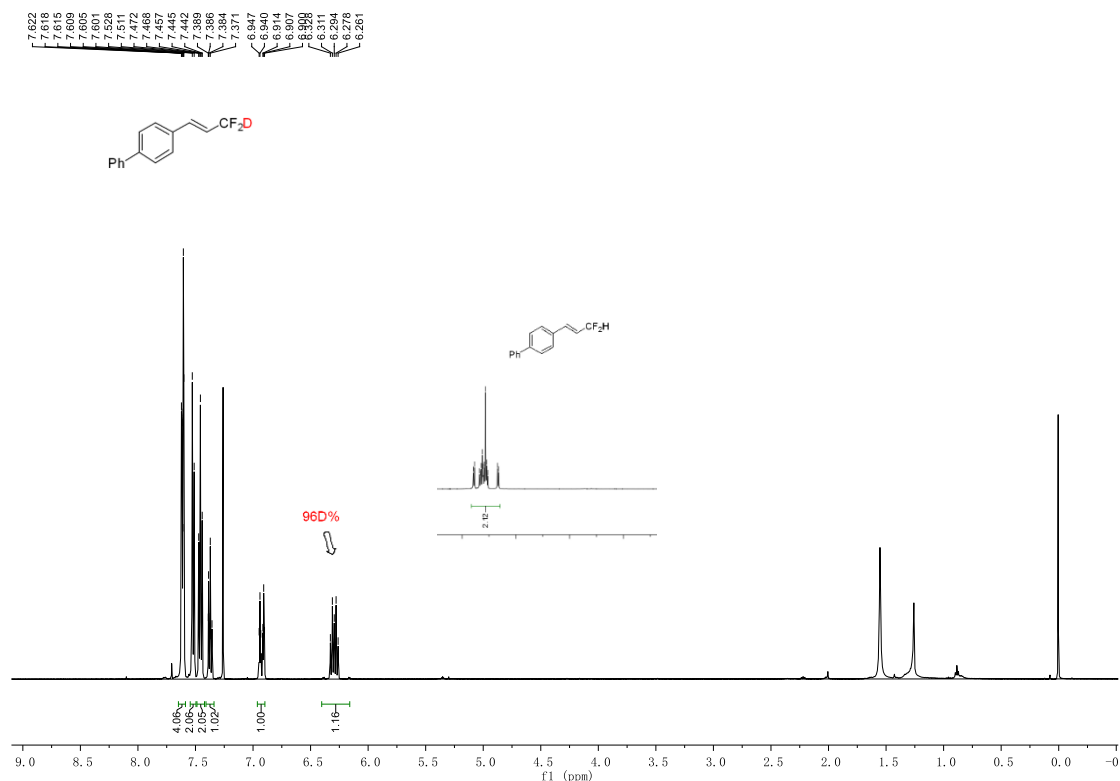

## 2-(1-([1,1'-Biphenyl]-4-yl)-3,3-difluoroallyl)-4,4,5,5-tetramethyl-1,3,2-dioxaborolane **9**

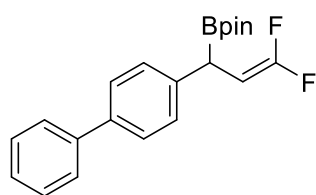

**9**

According to the reported literature,<sup>5</sup> intermediate **9** was synthesized. <sup>1</sup>H NMR (400 MHz, CDCl<sub>3</sub>) δ 7.60 – 7.55 (m, 1H), 7.54 – 7.49 (m, 1H), 7.46 – 7.38 (m, 1H), 7.35 – 7.27 (m, 1H), 4.61 (ddd, *J* = 25.2, 10.1, 2.3 Hz, 1H), 3.29 (d, *J* = 10.1 Hz, 1H), 1.23 (d, *J* = 4.1 Hz, 1H). <sup>13</sup>C NMR (126 MHz, CDCl<sub>3</sub>) δ 156.1 (t, *J* = 287.6 Hz), 141.1 (s), 140.1 (t, *J* = 2.1 Hz), 138.9 (s), 128.9 (s), 128.3 (s), 127.5 (s), 127.2 (s), 127.1 (s), 84.2 (s), 79.1 (dd, *J* = 23.1, 20.3 Hz), 24.7 (d, *J* = 1.6 Hz). <sup>19</sup>F NMR (377 MHz, CDCl<sub>3</sub>) δ -89.02 (d, *J* = 46.0 Hz), -90.37 (d, *J* = 46.0 Hz). ATR-FTIR (cm<sup>-1</sup>): 3840, 3014, 2814, 2148, 1964, 1275, 999, 649; HRMS *m/z* (ESI) calculated for C<sub>21</sub>H<sub>24</sub>BF<sub>2</sub>O<sub>2</sub> (M + H)<sup>+</sup> 357.1832, found 357.1832.

## 7. DFT Calculations

DFT calculations were conducted to elaborate the detailed mechanism of the Cu-catalyzed hydrodefluorination reaction with the Gaussian 09 package<sup>6</sup>. We optimized the geometries with B3LYP-D3<sup>7</sup> functional and a mixed basis set of SDD<sup>8</sup> for Cu atom and 6-31G(d)<sup>9</sup> for all other atoms in gas phase. Frequency computations were performed at the same level to determine the structures to be minima (no imaginary frequency) or transition states (only one imaginary frequency) and to obtain the thermal correction to free energies at 298.15 K and 1 atm pressure. Single-point solvation energies were calculated with B3LYP-D3 functional and a mixed basis set of SDD for Cu and 6-311+G(d,p)<sup>10</sup> for all other atoms with continuum model SMD<sup>11</sup> in acetonitrile solvent. A correction factor which consists on using an entropic term that is half (0.5) of the entropy in vacuum with the opposite sign was applied.<sup>12</sup>

**Table S1. The calculated energies of stationary points (in Hartree/Particle).**

| Structure                       | E <sub>ele</sub> | H <sub>corr</sub> | G <sub>corr</sub> | -0.5TS   | G <sub>sol</sub> |
|---------------------------------|------------------|-------------------|-------------------|----------|------------------|
| <b>1a</b>                       | -878.038158      | 0.236279          | 0.176070          | -0.0301  | -877.831984      |
| B <sub>2</sub> pin <sub>2</sub> | -822.841156      | 0.386623          | 0.318831          | -0.0339  | -822.488429      |
| <b>INT1A</b>                    | -1126.396358     | 0.529063          | 0.445568          | -0.04175 | -1125.909042     |
| <b>TS2A</b>                     | -1949.235581     | 0.917603          | 0.799067          | -0.05927 | -1948.377246     |
| <b>INT2A</b>                    | -1304.615794     | 0.588890          | 0.500323          | -0.04428 | -1304.071188     |
| pinB-O <sup>t</sup> Bu          | -644.638829      | 0.328257          | 0.270224          | -0.02902 | -644.339589      |
| <b>TS3A</b>                     | -2182.660408     | 0.825615          | 0.703185          | -0.06122 | -2181.896008     |
| <b>INT3A</b>                    | -2182.721473     | 0.828211          | 0.704359          | -0.06193 | -2181.955188     |
| <b>TS3B</b>                     | -2182.659172     | 0.825853          | 0.705820          | -0.06002 | -2181.893335     |
| <b>INT3B</b>                    | -2182.718958     | 0.828207          | 0.706260          | -0.06097 | -2181.951725     |
| <b>TS4A</b>                     | -2182.691255     | 0.826400          | 0.701414          | -0.06249 | -2181.927348     |



|                                |              |          |           |          |              |
|--------------------------------|--------------|----------|-----------|----------|--------------|
| <b>INT4A</b>                   | -993.145617  | 0.399152 | 0.331106  | -0.03402 | -992.780488  |
| <b>9</b>                       | -1189.570246 | 0.426455 | 0.346018  | -0.04022 | -1189.184009 |
| <sup>-</sup> O <sup>t</sup> Bu | -233.244704  | 0.127890 | 0.091836  | -0.01803 | -233.134841  |
| F <sup>-</sup>                 | -100.028418  | 0.002360 | -0.014159 | -0.00826 | -100.034318  |
| <b>TS5A</b>                    | -2315.968084 | 0.956549 | 0.822635  | -0.06696 | -2315.078492 |
| <b>INT5A</b>                   | -1671.352984 | 0.627929 | 0.526423  | -0.05075 | -1670.775808 |
| <b>TS6A</b>                    | -1671.343047 | 0.626567 | 0.529418  | -0.04857 | -1670.765055 |
| <b>INT6A</b>                   | -1671.373569 | 0.627898 | 0.526735  | -0.05058 | -1670.796253 |
| <b>TS6B</b>                    | -1671.338963 | 0.627025 | 0.530317  | -0.04835 | -1670.760292 |
| <b>INT6B</b>                   | -1671.373402 | 0.628276 | 0.529858  | -0.04921 | -1670.794335 |
| H <sub>2</sub> O               | -115.771971  | 0.055660 | 0.028711  | -0.01347 | -115.729786  |
| <b>TS7A</b>                    | -1787.119398 | 0.682979 | 0.576537  | -0.05322 | -1786.489640 |
| <b>INT7A</b>                   | -1008.394298 | 0.440409 | 0.364160  | -0.03812 | -1007.992014 |
| MeOH                           | -76.467297   | 0.024945 | 0.003499  | -0.01072 | -76.453075   |
| <b>TS7B</b>                    | -1747.812012 | 0.652634 | 0.550454  | -0.05109 | -1747.210468 |
| <b>INT7B</b>                   | -969.091919  | 0.410312 | 0.340106  | -0.0351  | -968.716710  |
| <sup>-</sup> OMe               | -115.246719  | 0.038476 | 0.013448  | -0.01251 | -115.220757  |
| <b>3a</b>                      | -778.759811  | 0.243864 | 0.185074  | -0.0294  | -778.545342  |

Notes: E<sub>ele</sub> (electronic energies in solvent), H<sub>corr</sub> (the thermal correction to enthalpy in gas), G<sub>corr</sub> (the thermal correction to Gibbs free energy in gas), -0.5TS (half the gas phase entropy) and G<sub>sol</sub> (the thermal correction to Gibbs free energy in solvent).

### Cartesian Coordinate (unit:angstrom)

**1a**

|   |           |           |           |   |           |           |           |
|---|-----------|-----------|-----------|---|-----------|-----------|-----------|
|   |           |           |           | C | 1.025949  | 0.994967  | 0.301022  |
| C | 1.220825  | -1.298550 | -0.402289 | C | 1.848098  | -0.097614 | -0.034100 |
| C | -0.165775 | -1.401401 | -0.432926 | H | -0.625211 | -2.341212 | -0.730225 |
| C | -0.987189 | -0.311092 | -0.098853 | H | -0.955153 | 1.757039  | 0.544113  |
| C | -0.357834 | 0.892556  | 0.269467  | H | 1.483562  | 1.928435  | 0.615749  |

|                                 |           |           |           |   |           |           |           |
|---------------------------------|-----------|-----------|-----------|---|-----------|-----------|-----------|
| C                               | -2.441753 | -0.480008 | -0.149784 | H | 3.819624  | 2.634906  | 0.619202  |
| H                               | -2.785311 | -1.465347 | -0.458181 | H | 3.623164  | 1.411346  | 1.880487  |
| C                               | -3.375158 | 0.435866  | 0.139532  | C | 3.262709  | 1.189905  | -1.561776 |
| H                               | -3.143828 | 1.447688  | 0.457155  | H | 3.039508  | 2.255038  | -1.673847 |
| C                               | -4.837859 | 0.156622  | 0.055475  | H | 4.306207  | 1.019353  | -1.846680 |
| F                               | -5.447701 | 0.996865  | -0.817021 | H | 2.616383  | 0.635332  | -2.249008 |
| F                               | -5.442033 | 0.345230  | 1.254860  | C | 3.262944  | -1.189806 | 1.561812  |
| F                               | -5.114940 | -1.105193 | -0.340789 | H | 3.039980  | -2.254990 | 1.673879  |
| H                               | 1.826763  | -2.151736 | -0.693003 | H | 4.306396  | -1.019019 | 1.846738  |
| C                               | 3.325477  | 0.017035  | 0.001637  | H | 2.616473  | -0.635380 | 2.249026  |
| C                               | 3.967952  | 1.195688  | -0.414390 | C | 3.903038  | -1.565067 | -0.836054 |
| C                               | 4.120411  | -1.050837 | 0.452120  | H | 4.950053  | -1.268466 | -0.704840 |
| C                               | 5.357352  | 1.302711  | -0.381470 | H | 3.820283  | -2.634678 | -0.619129 |
| H                               | 3.373969  | 2.022960  | -0.792799 | H | 3.623523  | -1.411192 | -1.880439 |
| C                               | 5.509753  | -0.943931 | 0.485247  | C | -2.998403 | -0.778842 | -0.108222 |
| H                               | 3.642332  | -1.960535 | 0.804730  | C | -2.998222 | 0.778878  | 0.108197  |
| C                               | 6.134486  | 0.233392  | 0.068548  | B | -0.852048 | -0.000227 | -0.000017 |
| H                               | 5.834105  | 2.220093  | -0.716411 | O | -1.613595 | 1.131146  | -0.172928 |
| H                               | 6.104913  | -1.778774 | 0.845655  | O | -1.613844 | -1.131430 | 0.172876  |
| H                               | 7.217512  | 0.316832  | 0.094357  | C | -3.902677 | 1.565318  | -0.836071 |
|                                 |           |           |           | H | -4.949766 | 1.268994  | -0.704827 |
| B <sub>2</sub> pin <sub>2</sub> |           |           |           | H | -3.819637 | 2.634911  | -0.619167 |
| C                               | 2.998402  | -0.778841 | 0.108220  | H | -3.623225 | 1.411354  | -1.880461 |
| C                               | 2.998220  | 0.778878  | -0.108190 | C | -3.262674 | 1.189896  | 1.561792  |
| B                               | 0.852048  | -0.000238 | -0.000016 | H | -3.039491 | 2.255034  | 1.673860  |
| O                               | 1.613586  | 1.131140  | 0.172904  | H | -4.306159 | 1.019322  | 1.846723  |
| O                               | 1.613850  | -1.131433 | -0.172911 | H | -2.616313 | 0.635337  | 2.249003  |
| C                               | 3.902651  | 1.565313  | 0.836107  | C | -3.262970 | -1.189804 | -1.561811 |
| H                               | 4.949742  | 1.268980  | 0.704896  | H | -3.040000 | -2.254986 | -1.673882 |

|              |           |           |           |    |           |           |           |
|--------------|-----------|-----------|-----------|----|-----------|-----------|-----------|
| H            | -4.306429 | -1.019028 | -1.846722 | H  | 6.144292  | 0.446382  | -0.000095 |
| H            | -2.616515 | -0.635372 | -2.249035 | H  | 4.558742  | 1.221456  | -0.000228 |
| C            | -3.903017 | -1.565076 | 0.836066  | C  | -2.179574 | -1.232399 | 0.000049  |
| H            | -4.950033 | -1.268462 | 0.704891  | C  | -2.949204 | -1.614587 | -1.271770 |
| H            | -3.820280 | -2.634684 | 0.619121  | C  | -2.949352 | -1.614630 | 1.271766  |
| H            | -3.623466 | -1.411221 | 1.880445  | H  | -2.032034 | -0.147194 | 0.000077  |
|              |           |           |           | C  | -4.340051 | -0.959567 | -1.268256 |
| <b>INT1A</b> |           |           |           | H  | -3.057074 | -2.707972 | -1.320580 |
| C            | 0.834457  | -3.242907 | 0.000172  | H  | -2.372001 | -1.306064 | -2.151425 |
| C            | -0.520584 | -3.148981 | 0.000124  | C  | -4.340198 | -0.959606 | 1.268104  |
| C            | 0.312007  | -1.035536 | 0.000018  | H  | -3.057238 | -2.708015 | 1.320530  |
| N            | 1.327776  | -1.947530 | 0.000073  | H  | -2.372256 | -1.306138 | 2.151502  |
| H            | 1.483108  | -4.105403 | 0.000240  | C  | -5.127331 | -1.324646 | -0.000127 |
| H            | -1.280635 | -3.913682 | 0.000148  | H  | -4.894442 | -1.258410 | -2.165798 |
| C            | 2.765340  | -1.611320 | 0.000061  | H  | -4.219919 | 0.132122  | -1.320429 |
| C            | 3.165374  | -0.846839 | -1.272302 | H  | -4.894696 | -1.258473 | 2.165572  |
| C            | 3.165311  | -0.846548 | 1.272268  | H  | -4.220070 | 0.132081  | 1.320322  |
| H            | 3.286363  | -2.577374 | 0.000181  | H  | -6.100596 | -0.819227 | -0.000174 |
| C            | 4.668411  | -0.528553 | -1.265773 | H  | -5.332489 | -2.405678 | -0.000156 |
| H            | 2.591558  | 0.087765  | -1.315525 | N  | -0.820889 | -1.795914 | 0.000100  |
| H            | 2.888622  | -1.436169 | -2.155291 | Cu | 0.367321  | 0.847913  | -0.000065 |
| C            | 4.668347  | -0.528255 | 1.265737  | O  | 0.450790  | 2.648840  | -0.000109 |
| H            | 2.591482  | 0.088061  | 1.315245  | C  | -0.679537 | 3.479760  | 0.000024  |
| H            | 2.888523  | -1.435678 | 2.155379  | C  | -1.537335 | 3.228371  | -1.259028 |
| C            | 5.065833  | 0.246420  | -0.000099 | C  | -1.537005 | 3.228417  | 1.259310  |
| H            | 4.925572  | 0.043886  | -2.164654 | C  | -0.179209 | 4.936773  | -0.000067 |
| H            | 5.242624  | -1.466370 | -1.313559 | H  | -0.924351 | 3.369583  | -2.156081 |
| H            | 4.925465  | 0.044395  | 2.164496  | H  | -1.894792 | 2.189076  | -1.258219 |
| H            | 5.242559  | -1.466060 | 1.313771  | H  | -2.407851 | 3.895954  | -1.316110 |

|             |           |          |           |   |           |           |           |
|-------------|-----------|----------|-----------|---|-----------|-----------|-----------|
| H           | -0.923788 | 3.369667 | 2.156197  | H | 3.748144  | 3.776751  | -1.284153 |
| H           | -2.407507 | 3.896000 | 1.316592  | H | 2.906909  | 2.293191  | -0.809708 |
| H           | -1.894457 | 2.189121 | 1.258635  | C | -3.896894 | 0.372816  | 0.126359  |
| H           | -1.005237 | 5.659771 | 0.000031  | C | -5.051167 | 0.640016  | 1.100209  |
| H           | 0.440865  | 5.112174 | 0.885980  | C | -4.370685 | -0.338975 | -1.151155 |
| H           | 0.440628  | 5.112145 | -0.886286 | H | -3.166257 | -0.265616 | 0.628706  |
|             |           |          |           | C | -5.767348 | -0.675691 | 1.445640  |
| <b>TS2A</b> |           |          |           | H | -5.777651 | 1.326852  | 0.643408  |
| C           | -2.694264 | 3.642487 | -0.861669 | H | -4.666131 | 1.129204  | 2.003132  |
| C           | -3.722766 | 2.813200 | -0.546741 | C | -5.127371 | -1.633346 | -0.812563 |
| C           | -1.793516 | 1.637422 | -0.311103 | H | -5.025848 | 0.341744  | -1.714128 |
| N           | -1.526482 | 2.914667 | -0.712176 | H | -3.498345 | -0.550251 | -1.780952 |
| H           | -2.690359 | 4.676898 | -1.168878 | C | -6.274519 | -1.378493 | 0.176610  |
| H           | -4.786210 | 2.986624 | -0.533844 | H | -6.597349 | -0.475191 | 2.133578  |
| C           | -0.182976 | 3.484984 | -0.960631 | H | -5.069402 | -1.338934 | 1.976298  |
| C           | 0.668585  | 3.475620 | 0.316779  | H | -5.507632 | -2.089282 | -1.734416 |
| C           | 0.516795  | 2.787850 | -2.136898 | H | -4.425938 | -2.355725 | -0.374689 |
| H           | -0.370016 | 4.529929 | -1.240866 | H | -6.765803 | -2.323556 | 0.437901  |
| C           | 2.057664  | 4.074926 | 0.051717  | H | -7.037454 | -0.747664 | -0.303698 |
| H           | 0.790383  | 2.442792 | 0.654083  | N | -3.153123 | 1.598288  | -0.203107 |
| H           | 0.142455  | 4.025821 | 1.108271  | O | -0.299389 | -2.055581 | -0.617708 |
| C           | 1.905502  | 3.398935 | -2.377490 | C | -0.758240 | -3.169254 | 0.168049  |
| H           | 0.630765  | 1.720260 | -1.921549 | C | -1.667379 | -2.654527 | 1.296080  |
| H           | -0.112221 | 2.874010 | -3.032547 | C | -1.573499 | -4.033211 | -0.805285 |
| C           | 2.757916  | 3.340745 | -1.101167 | C | 0.385558  | -3.996135 | 0.774492  |
| H           | 2.658831  | 4.015126 | 0.965678  | H | -1.112155 | -1.974200 | 1.946501  |
| H           | 1.961177  | 5.143394 | -0.196357 | H | -2.520105 | -2.119947 | 0.867501  |
| H           | 2.398278  | 2.862257 | -3.195809 | H | -2.056189 | -3.483500 | 1.900612  |
| H           | 1.803786  | 4.446592 | -2.701500 | H | -0.926644 | -4.420744 | -1.599514 |

|   |           |           |           |              |           |           |           |
|---|-----------|-----------|-----------|--------------|-----------|-----------|-----------|
| H | -2.042162 | -4.881425 | -0.291092 | C            | 2.709297  | -0.181418 | -3.532696 |
| H | -2.358904 | -3.428792 | -1.273343 | H            | 3.484003  | -0.649536 | -4.151654 |
| H | -0.035448 | -4.858244 | 1.307283  | H            | 1.955613  | 0.253093  | -4.199177 |
| H | 1.065134  | -4.351159 | -0.002250 | H            | 3.161089  | 0.630179  | -2.958246 |
| H | 0.965585  | -3.396224 | 1.479412  | C            | 1.252468  | -2.221196 | -3.444173 |
| C | 1.614079  | -0.148770 | 3.320146  | H            | 0.457038  | -1.687101 | -3.974568 |
| C | 2.799928  | 0.499744  | 2.526208  | H            | 1.884615  | -2.729822 | -4.181529 |
| O | 2.243193  | 0.606299  | 1.186522  | H            | 0.779697  | -2.963850 | -2.798356 |
| O | 0.944978  | -0.915813 | 2.287474  | C            | 4.156023  | -0.950164 | -1.127829 |
| C | 3.209606  | 1.891157  | 2.997733  | H            | 4.694324  | -1.425564 | -0.302351 |
| H | 3.575357  | 1.858505  | 4.030701  | H            | 4.871121  | -0.748771 | -1.933587 |
| H | 4.015408  | 2.271402  | 2.361538  | H            | 3.745463  | -0.007159 | -0.760984 |
| H | 2.376578  | 2.595486  | 2.944311  | C            | 3.625007  | -3.214194 | -2.060148 |
| C | 4.024927  | -0.416337 | 2.425828  | H            | 4.228767  | -3.071607 | -2.965004 |
| H | 4.737441  | 0.021435  | 1.721075  | H            | 4.272096  | -3.627672 | -1.278998 |
| H | 4.520992  | -0.534633 | 3.395152  | H            | 2.843541  | -3.947586 | -2.271970 |
| H | 3.738268  | -1.399875 | 2.042589  | Cu           | -0.567323 | 0.174574  | -0.090134 |
| C | 0.593142  | 0.878492  | 3.829200  | B            | 0.996133  | -1.333299 | -0.534372 |
| H | -0.296062 | 0.345716  | 4.180793  | B            | 1.251367  | -0.358577 | 1.050937  |
| H | 0.992066  | 1.474986  | 4.656822  |              |           |           |           |
| H | 0.286695  | 1.550007  | 3.020923  | <b>INT2A</b> |           |           |           |
| C | 2.023509  | -1.098075 | 4.441754  | C            | -2.820553 | 2.870321  | -0.115113 |
| H | 2.611409  | -0.572751 | 5.203499  | C            | -3.714772 | 1.846570  | -0.114539 |
| H | 1.128970  | -1.508244 | 4.921803  | C            | -1.633273 | 0.937541  | -0.031741 |
| H | 2.611592  | -1.933260 | 4.056019  | N            | -1.558512 | 2.301243  | -0.064958 |
| C | 3.029145  | -1.887919 | -1.582647 | H            | -2.971205 | 3.938618  | -0.147355 |
| C | 2.049587  | -1.205215 | -2.609193 | H            | -4.792635 | 1.851754  | -0.144908 |
| O | 1.150351  | -0.511396 | -1.735520 | C            | -0.298359 | 3.075770  | -0.023024 |
| O | 2.183882  | -2.164902 | -0.454058 | C            | 0.451375  | 2.837178  | 1.298957  |

|   |           |           |           |           |           |           |           |
|---|-----------|-----------|-----------|-----------|-----------|-----------|-----------|
| C | 0.585854  | 2.782693  | -1.247924 | H         | -4.034247 | -3.129246 | -1.273565 |
| H | -0.605811 | 4.129042  | -0.062346 | H         | -6.023995 | -3.736145 | 0.089141  |
| C | 1.768964  | 3.624724  | 1.340191  | H         | -6.590559 | -2.067414 | 0.052054  |
| H | 0.672690  | 1.766352  | 1.387449  | N         | -2.968863 | 0.678271  | -0.064555 |
| H | -0.200904 | 3.106494  | 2.139479  | Cu        | -0.096013 | -0.297239 | 0.021733  |
| C | 1.904214  | 3.568806  | -1.179932 | C         | 3.540522  | -2.551678 | 0.032151  |
| H | 0.812238  | 1.709276  | -1.268643 | C         | 4.022585  | -1.065297 | -0.075782 |
| H | 0.028281  | 3.016752  | -2.163739 | B         | 1.702548  | -1.140422 | 0.029602  |
| C | 2.650928  | 3.278894  | 0.130799  | O         | 2.825195  | -0.332729 | 0.283468  |
| H | 2.294856  | 3.402416  | 2.276301  | O         | 2.122436  | -2.438421 | -0.249006 |
| H | 1.556397  | 4.705260  | 1.345229  | C         | 5.147083  | -0.672786 | 0.879854  |
| H | 2.526083  | 3.305549  | -2.044082 | H         | 6.048748  | -1.267803 | 0.690150  |
| H | 1.698269  | 4.647867  | -1.256094 | H         | 5.399778  | 0.383552  | 0.737619  |
| H | 3.586673  | 3.851030  | 0.167606  | H         | 4.850644  | -0.808882 | 1.922263  |
| H | 2.911165  | 2.212640  | 0.170417  | C         | 4.381602  | -0.649094 | -1.510014 |
| C | -3.522016 | -0.682672 | -0.025335 | H         | 4.501302  | 0.438902  | -1.542183 |
| C | -4.321527 | -0.924928 | 1.263540  | H         | 5.314633  | -1.112372 | -1.849996 |
| C | -4.355701 | -0.991613 | -1.277296 | H         | 3.579129  | -0.921557 | -2.202278 |
| H | -2.642331 | -1.336099 | -0.019749 | C         | 3.667080  | -3.124365 | 1.451421  |
| C | -4.852466 | -2.366483 | 1.306085  | H         | 3.118929  | -4.070479 | 1.498373  |
| H | -5.165626 | -0.221012 | 1.305447  | H         | 4.711282  | -3.311731 | 1.726696  |
| H | -3.683054 | -0.715265 | 2.129834  | H         | 3.225372  | -2.441438 | 2.183485  |
| C | -4.884756 | -2.433925 | -1.228255 | C         | 4.166838  | -3.511562 | -0.977307 |
| H | -5.204119 | -0.294002 | -1.333106 | H         | 5.254638  | -3.562608 | -0.845571 |
| H | -3.743192 | -0.827806 | -2.171687 | H         | 3.757579  | -4.516827 | -0.832046 |
| C | -5.685610 | -2.693405 | 0.057116  | H         | 3.951501  | -3.207710 | -2.004250 |
| H | -5.445998 | -2.517309 | 2.215697  |           |           |           |           |
| H | -4.001181 | -3.059692 | 1.366730  | pinB-O'Bu |           |           |           |
| H | -5.501181 | -2.633597 | -2.112870 | C         | 1.590153  | 0.809577  | 0.070601  |

|   |           |           |           |             |           |           |           |
|---|-----------|-----------|-----------|-------------|-----------|-----------|-----------|
| C | 1.979248  | -0.710701 | -0.058597 | H           | -3.607157 | 1.825663  | -0.668261 |
| B | -0.275198 | -0.471749 | -0.181580 | H           | -1.830525 | 1.856106  | -0.600942 |
| O | 0.757312  | -1.299588 | -0.569105 | H           | -4.856342 | -0.385834 | -0.137234 |
| O | 0.164861  | 0.734303  | 0.341311  | H           | -3.897448 | -1.170722 | -1.415151 |
| C | 3.110802  | -1.004981 | -1.038560 | H           | -3.897078 | -1.839929 | 0.227612  |
| H | 4.032268  | -0.498467 | -0.729490 |             |           |           |           |
| H | 3.304134  | -2.082011 | -1.064232 | <b>TS3A</b> |           |           |           |
| H | 2.855488  | -0.684957 | -2.050930 | C           | 3.071107  | 3.593781  | 0.640069  |
| C | 2.262575  | -1.369915 | 1.297127  | C           | 4.040644  | 2.643502  | 0.602732  |
| H | 2.310058  | -2.454067 | 1.158773  | C           | 2.118836  | 1.686092  | -0.120842 |
| H | 3.212177  | -1.029237 | 1.722720  | N           | 1.900140  | 2.994048  | 0.194502  |
| H | 1.461495  | -1.153126 | 2.011011  | H           | 3.106164  | 4.630079  | 0.938979  |
| C | 1.753795  | 1.582554  | -1.243668 | H           | 5.087387  | 2.695722  | 0.854525  |
| H | 1.271102  | 2.559599  | -1.143762 | C           | 0.580951  | 3.652503  | 0.176866  |
| H | 2.808692  | 1.739111  | -1.491384 | C           | -0.071993 | 3.584485  | -1.211133 |
| H | 1.276412  | 1.049519  | -2.071967 | C           | -0.330451 | 3.066259  | 1.267190  |
| C | 2.264600  | 1.557805  | 1.215783  | H           | 0.777812  | 4.706379  | 0.412356  |
| H | 3.352959  | 1.559953  | 1.087699  | C           | -1.452748 | 4.259153  | -1.201303 |
| H | 1.920328  | 2.596916  | 1.230999  | H           | -0.177835 | 2.531696  | -1.501201 |
| H | 2.025581  | 1.109026  | 2.182308  | H           | 0.590859  | 4.046056  | -1.952859 |
| O | -1.563969 | -0.855815 | -0.320373 | C           | -1.704121 | 3.752016  | 1.267947  |
| C | -2.714815 | -0.036701 | 0.004783  | H           | -0.451415 | 1.991318  | 1.089952  |
| C | -2.704370 | 0.287190  | 1.504130  | H           | 0.162082  | 3.171463  | 2.241872  |
| C | -2.698839 | 1.239305  | -0.845941 | C           | -2.363992 | 3.664823  | -0.115585 |
| C | -3.919441 | -0.911223 | -0.351749 | H           | -1.915912 | 4.157321  | -2.190205 |
| H | -2.669647 | -0.639944 | 2.086615  | H           | -1.330972 | 5.338104  | -1.022009 |
| H | -1.835006 | 0.897139  | 1.763117  | H           | -2.344277 | 3.287459  | 2.027392  |
| H | -3.611707 | 0.835137  | 1.781854  | H           | -1.589529 | 4.809102  | 1.552705  |
| H | -2.657671 | 0.980207  | -1.909570 | H           | -3.331309 | 4.182759  | -0.110108 |

|   |           |           |           |    |           |           |           |
|---|-----------|-----------|-----------|----|-----------|-----------|-----------|
| H | -2.566853 | 2.610699  | -0.344343 | H  | 0.859527  | 0.168701  | 4.722653  |
| C | 4.106576  | 0.187474  | -0.084048 | H  | 1.376434  | 0.706288  | 3.103124  |
| C | 4.934646  | 0.212477  | -1.376558 | C  | 0.259766  | -3.374517 | 2.541361  |
| C | 4.927891  | -0.250508 | 1.133863  | H  | 0.990189  | -4.053288 | 2.090529  |
| H | 3.298548  | -0.536458 | -0.212028 | H  | -0.069353 | -3.798122 | 3.496140  |
| C | 5.590630  | -1.156148 | -1.619929 | H  | -0.603579 | -3.309619 | 1.872526  |
| H | 5.704110  | 0.994948  | -1.298266 | C  | 2.103802  | -2.092083 | 3.667023  |
| H | 4.276226  | 0.471143  | -2.213194 | H  | 1.777428  | -2.327097 | 4.686765  |
| C | 5.549982  | -1.630964 | 0.872659  | H  | 2.776046  | -2.887934 | 3.330354  |
| H | 5.728851  | 0.476452  | 1.332241  | H  | 2.671101  | -1.158745 | 3.688160  |
| H | 4.277212  | -0.274993 | 2.015746  | Cu | 0.976201  | 0.327375  | -0.762740 |
| C | 6.407120  | -1.619280 | -0.403253 | C  | 0.472694  | -0.792658 | -2.325870 |
| H | 6.226440  | -1.106650 | -2.512124 | H  | -0.195065 | -0.437354 | -3.105866 |
| H | 4.799771  | -1.884586 | -1.833699 | C  | -0.178254 | -1.317700 | -1.076009 |
| H | 6.149761  | -1.938226 | 1.738252  | H  | 0.156779  | -2.317064 | -0.791062 |
| H | 4.741945  | -2.368112 | 0.765805  | B  | 0.413830  | -0.777854 | 0.844262  |
| H | 6.826281  | -2.616419 | -0.586090 | C  | -1.661093 | -1.161032 | -0.962150 |
| H | 7.260338  | -0.939812 | -0.255701 | C  | -2.318442 | 0.000714  | -1.395573 |
| N | 3.437990  | 1.479866  | 0.147074  | C  | -2.442543 | -2.172397 | -0.386513 |
| C | 0.909078  | -1.998124 | 2.723698  | C  | -3.692439 | 0.152502  | -1.240708 |
| C | -0.127013 | -0.867223 | 3.064593  | H  | -1.741185 | 0.796026  | -1.858526 |
| O | -0.586109 | -0.465924 | 1.742469  | C  | -3.818042 | -2.024663 | -0.231608 |
| O | 1.388404  | -1.583724 | 1.412108  | H  | -1.961190 | -3.086514 | -0.046774 |
| C | -1.338084 | -1.316042 | 3.875493  | C  | -4.473287 | -0.853893 | -0.647225 |
| H | -1.030813 | -1.713946 | 4.849786  | H  | -4.173444 | 1.056105  | -1.605561 |
| H | -2.001569 | -0.462509 | 4.047379  | H  | -4.390099 | -2.817106 | 0.243669  |
| H | -1.908792 | -2.080501 | 3.344315  | C  | 1.582541  | -1.592369 | -2.865230 |
| C | 0.523125  | 0.368247  | 3.699842  | F  | 1.209589  | -2.699489 | -3.585719 |
| H | -0.211320 | 1.178445  | 3.727118  | F  | 2.399173  | -0.889489 | -3.699772 |



|              |           |           |           |   |           |           |           |
|--------------|-----------|-----------|-----------|---|-----------|-----------|-----------|
| F            | 2.393054  | -2.092356 | -1.863773 | H | -4.433305 | -1.770583 | 2.445353  |
| C            | -5.934926 | -0.683047 | -0.467501 | C | -3.431244 | -4.843844 | 1.115701  |
| C            | -6.819554 | -1.758854 | -0.657191 | H | -3.687071 | -5.323727 | -0.993021 |
| C            | -6.474881 | 0.562087  | -0.100395 | H | -5.191675 | -4.992970 | -0.136782 |
| C            | -8.193786 | -1.596463 | -0.484776 | H | -3.496287 | -4.005650 | 3.126020  |
| H            | -6.425646 | -2.722675 | -0.967819 | H | -5.074975 | -4.189205 | 2.365409  |
| C            | -7.849182 | 0.726138  | 0.069102  | H | -3.496099 | -5.885481 | 1.452706  |
| H            | -5.805746 | 1.399762  | 0.077194  | H | -2.363494 | -4.613465 | 0.991135  |
| C            | -8.715661 | -0.352801 | -0.121512 | C | -2.939561 | 2.089943  | -1.171472 |
| H            | -8.859305 | -2.440911 | -0.644749 | C | -2.411621 | 1.817294  | -2.589295 |
| H            | -8.243404 | 1.696535  | 0.360024  | C | -3.501737 | 3.508455  | -1.044806 |
| H            | -9.786685 | -0.225679 | 0.011338  | H | -2.101127 | 1.995899  | -0.475979 |
|              |           |           |           | C | -1.323947 | 2.841415  | -2.947741 |
| <b>INT3A</b> |           |           |           | H | -3.245414 | 1.874912  | -3.304293 |
| C            | -5.748278 | -0.094166 | -0.387921 | H | -2.001850 | 0.802001  | -2.635189 |
| C            | -5.287623 | 1.117567  | -0.802156 | C | -2.398586 | 4.525026  | -1.387989 |
| C            | -3.486836 | -0.174449 | -0.328827 | H | -4.343828 | 3.647314  | -1.738362 |
| N            | -4.634834 | -0.868276 | -0.102587 | H | -3.881439 | 3.674026  | -0.029130 |
| H            | -6.754880 | -0.464110 | -0.267067 | C | -1.835183 | 4.282279  | -2.797311 |
| H            | -5.821375 | 2.001817  | -1.108857 | H | -0.966637 | 2.661377  | -3.968250 |
| C            | -4.676291 | -2.271744 | 0.351076  | H | -0.465682 | 2.689174  | -2.278648 |
| C            | -4.089355 | -3.216155 | -0.711989 | H | -2.793168 | 5.544493  | -1.299500 |
| C            | -3.974338 | -2.440990 | 1.708016  | H | -1.586048 | 4.427230  | -0.655133 |
| H            | -5.740806 | -2.506832 | 0.478381  | H | -1.029831 | 4.996402  | -3.008268 |
| C            | -4.142442 | -4.675444 | -0.235570 | H | -2.625860 | 4.468218  | -3.539545 |
| H            | -3.046382 | -2.930165 | -0.901888 | N | -3.905239 | 1.051622  | -0.750871 |
| H            | -4.633628 | -3.087270 | -1.655671 | C | -0.507661 | 2.577307  | 2.226588  |
| C            | -4.029548 | -3.903734 | 2.173401  | C | -0.262550 | 1.263847  | 3.060151  |
| H            | -2.927033 | -2.130766 | 1.600233  | O | 0.664880  | 0.532973  | 2.218381  |

|    |           |           |           |             |           |           |           |
|----|-----------|-----------|-----------|-------------|-----------|-----------|-----------|
| O  | -0.255989 | 2.134256  | 0.863878  | H           | 2.991465  | 1.101071  | -2.128633 |
| C  | 0.385854  | 1.477800  | 4.425213  | C           | 5.434185  | -0.257319 | -0.168301 |
| H  | -0.251822 | 2.097910  | 5.065690  | H           | 5.044419  | -1.302547 | 1.678688  |
| H  | 0.528103  | 0.510669  | 4.917682  | H           | 5.438502  | 0.834304  | -2.029203 |
| H  | 1.364036  | 1.955132  | 4.334072  | C           | 0.479101  | -1.699733 | -1.809895 |
| C  | -1.517865 | 0.392550  | 3.197726  | F           | 1.764716  | -2.038259 | -2.111641 |
| H  | -1.226516 | -0.583621 | 3.597518  | F           | -0.239844 | -2.858837 | -1.938471 |
| H  | -2.251693 | 0.843534  | 3.874403  | F           | 0.073472  | -0.886719 | -2.840929 |
| H  | -1.989464 | 0.225889  | 2.223936  | C           | 6.905471  | -0.438710 | -0.115339 |
| C  | 0.515802  | 3.680062  | 2.517114  | C           | 7.642916  | -0.715990 | -1.279830 |
| H  | 0.405105  | 4.472095  | 1.769927  | C           | 7.604374  | -0.340450 | 1.100698  |
| H  | 0.371677  | 4.115623  | 3.511298  | C           | 9.026094  | -0.886699 | -1.231083 |
| H  | 1.535855  | 3.290182  | 2.447848  | H           | 7.119614  | -0.824094 | -2.225830 |
| C  | -1.928029 | 3.130978  | 2.310075  | C           | 8.987008  | -0.514922 | 1.151449  |
| H  | -2.179094 | 3.392298  | 3.344199  | H           | 7.058222  | -0.101727 | 2.009216  |
| H  | -2.009849 | 4.037115  | 1.701520  | C           | 9.705653  | -0.788123 | -0.014702 |
| H  | -2.661958 | 2.408647  | 1.945010  | H           | 9.572936  | -1.107986 | -2.144265 |
| Cu | -1.641422 | -0.715841 | -0.297173 | H           | 9.505563  | -0.427884 | 2.103066  |
| C  | 0.274919  | -1.062594 | -0.473909 | H           | 10.783344 | -0.923207 | 0.024116  |
| H  | 0.621559  | -1.785520 | 0.275668  |             |           |           |           |
| C  | 1.101975  | 0.259202  | -0.334338 | <b>TS3B</b> |           |           |           |
| H  | 0.861950  | 0.885151  | -1.202633 | C           | -1.736732 | 3.907148  | 1.352601  |
| B  | 0.518278  | 0.988564  | 0.928596  | C           | -0.483005 | 3.637174  | 1.798883  |
| C  | 2.610723  | 0.080621  | -0.272535 | C           | -1.070295 | 1.981601  | 0.368597  |
| C  | 3.222079  | -0.587684 | 0.799542  | N           | -2.083209 | 2.888803  | 0.476575  |
| C  | 3.439305  | 0.579708  | -1.285362 | H           | -2.401157 | 4.730314  | 1.565235  |
| C  | 4.602884  | -0.755186 | 0.849776  | H           | 0.151898  | 4.181545  | 2.477831  |
| H  | 2.603643  | -0.979159 | 1.601911  | C           | -3.403696 | 2.780474  | -0.173511 |
| C  | 4.822093  | 0.416071  | -1.237547 | C           | -3.290056 | 2.642774  | -1.698719 |

|   |           |           |           |    |           |           |           |
|---|-----------|-----------|-----------|----|-----------|-----------|-----------|
| C | -4.220639 | 1.634469  | 0.441920  | H  | 2.436463  | -0.695631 | 1.998030  |
| H | -3.909735 | 3.729622  | 0.045677  | H  | 4.424570  | 0.286855  | 3.115199  |
| C | -4.684498 | 2.544231  | -2.337120 | H  | 3.414441  | 1.477230  | 3.930570  |
| H | -2.721434 | 1.736613  | -1.938669 | N  | -0.085248 | 2.463008  | 1.178170  |
| H | -2.725068 | 3.490947  | -2.103986 | C  | -1.593362 | -2.840805 | 2.020146  |
| C | -5.608628 | 1.534558  | -0.207032 | C  | -3.011962 | -2.180178 | 1.909976  |
| H | -3.678899 | 0.694772  | 0.295834  | O  | -2.943026 | -1.540684 | 0.599536  |
| H | -4.303185 | 1.791754  | 1.525206  | O  | -0.773959 | -1.919411 | 1.237683  |
| C | -5.496615 | 1.388067  | -1.731993 | C  | -4.184562 | -3.154363 | 1.905524  |
| H | -4.580323 | 2.413557  | -3.420643 | H  | -4.215316 | -3.728444 | 2.838956  |
| H | -5.225406 | 3.490578  | -2.183936 | H  | -5.123585 | -2.599086 | 1.814250  |
| H | -6.150397 | 0.682582  | 0.221217  | H  | -4.121378 | -3.848070 | 1.064802  |
| H | -6.194890 | 2.435115  | 0.031983  | C  | -3.236846 | -1.064164 | 2.937294  |
| H | -6.495151 | 1.350638  | -2.184664 | H  | -4.146268 | -0.516590 | 2.672966  |
| H | -4.999601 | 0.438477  | -1.966686 | H  | -3.354636 | -1.467111 | 3.948580  |
| C | 1.170008  | 1.727912  | 1.427280  | H  | -2.402581 | -0.355554 | 2.932392  |
| C | 2.368622  | 2.665873  | 1.608376  | C  | -1.509518 | -4.199054 | 1.313908  |
| C | 1.002084  | 0.776570  | 2.622907  | H  | -0.458135 | -4.494023 | 1.239185  |
| H | 1.341370  | 1.130076  | 0.525913  | H  | -2.049776 | -4.975669 | 1.865135  |
| C | 3.650128  | 1.840717  | 1.808978  | H  | -1.920653 | -4.135963 | 0.301432  |
| H | 2.215284  | 3.305005  | 2.490247  | C  | -1.017954 | -2.920096 | 3.428778  |
| H | 2.459066  | 3.324194  | 0.736140  | H  | -1.655315 | -3.535279 | 4.074223  |
| C | 2.288118  | -0.029282 | 2.855853  | H  | -0.023261 | -3.375788 | 3.394903  |
| H | 0.756811  | 1.371111  | 3.515833  | H  | -0.919565 | -1.927924 | 3.874672  |
| H | 0.163577  | 0.100990  | 2.424101  | Cu | -0.954824 | 0.387641  | -0.636350 |
| C | 3.512547  | 0.887054  | 3.006660  | C  | 0.013074  | -0.460180 | -2.215419 |
| H | 4.504744  | 2.512663  | 1.950733  | H  | -0.283859 | -0.092929 | -3.192863 |
| H | 3.849085  | 1.263885  | 0.897975  | C  | -0.912173 | -1.422884 | -1.545481 |
| H | 2.170616  | -0.666805 | 3.740959  | H  | -0.425233 | -2.345017 | -1.216699 |

|              |           |           |           |   |           |          |           |
|--------------|-----------|-----------|-----------|---|-----------|----------|-----------|
| B            | -1.615231 | -1.302096 | 0.326378  | C | 0.598458  | 4.252482 | -0.789679 |
| C            | -2.103000 | -1.797167 | -2.397077 | C | 0.307293  | 2.289311 | 0.308201  |
| F            | -2.823241 | -2.813497 | -1.864606 | N | -0.642639 | 3.187206 | 0.689345  |
| F            | -2.957431 | -0.749742 | -2.579140 | H | -1.130171 | 5.236836 | 0.198045  |
| F            | -1.730026 | -2.203578 | -3.631633 | H | 1.064056  | 4.955675 | -1.460081 |
| C            | 1.428429  | -0.474519 | -1.909240 | C | -1.800189 | 2.877651 | 1.554301  |
| C            | 2.340006  | 0.316277  | -2.656910 | C | -2.795410 | 1.955636 | 0.827123  |
| C            | 1.988598  | -1.229420 | -0.844149 | C | -1.373451 | 2.295919 | 2.908992  |
| C            | 3.691663  | 0.355865  | -2.360500 | H | -2.288104 | 3.843787 | 1.737477  |
| H            | 1.953088  | 0.922724  | -3.473316 | C | -4.020578 | 1.669051 | 1.707427  |
| C            | 3.351133  | -1.193982 | -0.565033 | H | -2.294450 | 1.012032 | 0.580194  |
| H            | 1.347216  | -1.842764 | -0.217732 | H | -3.094332 | 2.417394 | -0.122156 |
| C            | 4.245322  | -0.399672 | -1.302690 | C | -2.606200 | 2.017764 | 3.784006  |
| H            | 4.337506  | 1.007177  | -2.944230 | H | -0.828170 | 1.358386 | 2.738733  |
| H            | 3.733728  | -1.820482 | 0.237126  | H | -0.680185 | 2.986371 | 3.405429  |
| C            | 5.687669  | -0.347222 | -0.981084 | C | -3.599250 | 1.090503 | 3.066146  |
| C            | 6.654671  | -0.144326 | -1.984739 | H | -4.684677 | 0.975152 | 1.181604  |
| C            | 6.147609  | -0.491127 | 0.342860  | H | -4.587803 | 2.599079 | 1.865638  |
| C            | 8.012983  | -0.077001 | -1.678668 | H | -2.286929 | 1.577698 | 4.736432  |
| H            | 6.336982  | -0.064482 | -3.020490 | H | -3.102985 | 2.969044 | 4.028059  |
| C            | 7.505980  | -0.430996 | 0.649162  | H | -4.480524 | 0.917785 | 3.696114  |
| H            | 5.428980  | -0.630041 | 1.144978  | H | -3.124677 | 0.114735 | 2.900018  |
| C            | 8.449181  | -0.219451 | -0.359188 | C | 2.104436  | 2.278294 | -1.402116 |
| H            | 8.735192  | 0.075399  | -2.477104 | C | 1.450155  | 1.528503 | -2.575491 |
| H            | 7.827686  | -0.538543 | 1.682362  | C | 3.208057  | 3.225122 | -1.884481 |
| H            | 9.508205  | -0.168522 | -0.120810 | H | 2.546530  | 1.533148 | -0.736108 |
|              |           |           |           | C | 2.508239  | 0.751977 | -3.372435 |
| <b>INT3B</b> |           |           |           | H | 0.936866  | 2.253212 | -3.224607 |
| C            | -0.480084 | 4.392805  | 0.025865  | H | 0.686309  | 0.850528 | -2.175898 |

|   |          |           |           |    |           |           |           |
|---|----------|-----------|-----------|----|-----------|-----------|-----------|
| C | 4.261063 | 2.445211  | -2.692525 | H  | 5.222568  | 1.562687  | 0.084537  |
| H | 2.780250 | 4.003719  | -2.532006 | H  | 3.984724  | 1.532753  | 1.350997  |
| H | 3.669307 | 3.730999  | -1.026952 | Cu | 0.431519  | 0.397465  | 0.639735  |
| C | 3.622775 | 1.686228  | -3.865969 | C  | 0.313293  | -1.566744 | 0.508249  |
| H | 2.034876 | 0.236044  | -4.216336 | H  | 0.434920  | -2.071597 | 1.472083  |
| H | 2.942521 | -0.018360 | -2.722075 | C  | 1.401641  | -2.089089 | -0.461199 |
| H | 5.034002 | 3.135532  | -3.051331 | H  | 1.321924  | -1.606288 | -1.441605 |
| H | 4.758741 | 1.722388  | -2.033191 | B  | 2.753936  | -1.646680 | 0.212055  |
| H | 4.388782 | 1.115191  | -4.404597 | C  | 1.319275  | -3.576688 | -0.723558 |
| H | 3.204486 | 2.409478  | -4.581915 | F  | 2.371043  | -3.998682 | -1.485390 |
| N | 1.072509 | 2.964613  | -0.597285 | F  | 1.341479  | -4.306518 | 0.413483  |
| C | 4.638209 | -0.433290 | 0.683499  | F  | 0.193739  | -3.923148 | -1.394111 |
| C | 4.194920 | -1.284979 | 1.931249  | C  | -1.112978 | -1.616256 | 0.076669  |
| O | 3.256338 | -2.225495 | 1.346972  | C  | -2.130362 | -1.853915 | 1.027254  |
| O | 3.480646 | -0.543680 | -0.195033 | C  | -1.544336 | -1.304724 | -1.232593 |
| C | 5.315548 | -2.067099 | 2.608093  | C  | -3.477501 | -1.717269 | 0.713683  |
| H | 6.083123 | -1.387517 | 2.995896  | H  | -1.842779 | -2.113275 | 2.044260  |
| H | 4.907405 | -2.637980 | 3.447767  | C  | -2.890888 | -1.155925 | -1.543072 |
| H | 5.784469 | -2.772040 | 1.918297  | H  | -0.804003 | -1.158662 | -2.014799 |
| C | 3.402805 | -0.472916 | 2.965297  | C  | -3.894525 | -1.336666 | -0.573726 |
| H | 2.972151 | -1.163444 | 3.696626  | H  | -4.220707 | -1.866922 | 1.493166  |
| H | 4.038849 | 0.245011  | 3.493368  | H  | -3.175798 | -0.911892 | -2.563719 |
| H | 2.574774 | 0.063961  | 2.487793  | C  | -5.323445 | -1.106359 | -0.882474 |
| C | 5.819951 | -1.037194 | -0.082028 | C  | -6.331992 | -1.916857 | -0.329566 |
| H | 5.934264 | -0.506935 | -1.033006 | C  | -5.717536 | -0.049722 | -1.724622 |
| H | 6.754711 | -0.947437 | 0.480967  | C  | -7.677828 | -1.680268 | -0.606212 |
| H | 5.641487 | -2.093843 | -0.302947 | H  | -6.051520 | -2.754948 | 0.302461  |
| C | 4.890357 | 1.041514  | 0.987276  | C  | -7.063038 | 0.183529  | -2.007071 |
| H | 5.675072 | 1.146873  | 1.744798  | H  | -4.957775 | 0.607134  | -2.139917 |

|             |           |           |           |   |           |           |           |
|-------------|-----------|-----------|-----------|---|-----------|-----------|-----------|
| C           | -8.051599 | -0.629701 | -1.448009 | C | -2.472269 | 2.198275  | -1.383217 |
| H           | -8.437020 | -2.326122 | -0.172034 | C | -2.127527 | 1.752372  | -2.813852 |
| H           | -7.340729 | 1.009667  | -2.657185 | C | -2.755753 | 3.702121  | -1.332939 |
| H           | -9.100586 | -0.447348 | -1.665690 | H | -1.611311 | 1.996842  | -0.740593 |
|             |           |           |           | C | -0.894926 | 2.519294  | -3.317589 |
| <b>TS4A</b> |           |           |           | H | -2.990750 | 1.944704  | -3.467656 |
| C           | -5.538789 | 0.642555  | -0.190403 | H | -1.942209 | 0.672001  | -2.827659 |
| C           | -4.902760 | 1.729152  | -0.703608 | C | -1.505514 | 4.464529  | -1.804701 |
| C           | -3.345141 | 0.106026  | -0.394033 | H | -3.600398 | 3.949606  | -1.992488 |
| N           | -4.574945 | -0.337458 | -0.006640 | H | -3.033802 | 4.003933  | -0.316943 |
| H           | -6.576144 | 0.484618  | 0.061926  | C | -1.098974 | 4.039733  | -3.225228 |
| H           | -5.283303 | 2.698638  | -0.979874 | H | -0.666759 | 2.222470  | -4.347989 |
| C           | -4.854591 | -1.710771 | 0.456506  | H | -0.026416 | 2.232864  | -2.706889 |
| C           | -4.653895 | -2.729235 | -0.681022 | H | -1.690797 | 5.544907  | -1.765714 |
| C           | -4.023318 | -2.065989 | 1.699503  | H | -0.681932 | 4.251211  | -1.109098 |
| H           | -5.914529 | -1.711213 | 0.742419  | H | -0.185650 | 4.565662  | -3.529347 |
| C           | -4.948343 | -4.155883 | -0.193046 | H | -1.887683 | 4.342068  | -3.930209 |
| H           | -3.620854 | -2.671782 | -1.047143 | N | -3.564007 | 1.385585  | -0.814171 |
| H           | -5.304421 | -2.460041 | -1.522760 | C | -0.247988 | 2.678817  | 2.183954  |
| C           | -4.320184 | -3.498138 | 2.167817  | C | -0.353208 | 1.361266  | 3.039170  |
| H           | -2.958489 | -1.980025 | 1.448217  | O | 0.490568  | 0.445028  | 2.289528  |
| H           | -4.222153 | -1.336536 | 2.494568  | O | 0.014990  | 2.160277  | 0.846696  |
| C           | -4.092870 | -4.508475 | 1.032899  | C | 0.186673  | 1.472042  | 4.460977  |
| H           | -4.761352 | -4.864822 | -1.007819 | H | -0.381211 | 2.214103  | 5.033726  |
| H           | -6.013693 | -4.247758 | 0.069217  | H | 0.091571  | 0.505264  | 4.965303  |
| H           | -3.689581 | -3.739039 | 3.032277  | H | 1.241469  | 1.754737  | 4.467871  |
| H           | -5.363806 | -3.564700 | 2.511230  | C | -1.759294 | 0.748558  | 3.038688  |
| H           | -4.319316 | -5.524760 | 1.378041  | H | -1.707572 | -0.247149 | 3.490214  |
| H           | -3.031979 | -4.495247 | 0.744805  | H | -2.467054 | 1.355072  | 3.613647  |

|    |           |           |           |              |           |           |           |
|----|-----------|-----------|-----------|--------------|-----------|-----------|-----------|
| H  | -2.132936 | 0.627302  | 2.017188  | C            | 6.873459  | -0.572794 | -0.131533 |
| C  | 0.957330  | 3.548908  | 2.553606  | C            | 7.564212  | -1.064712 | -1.252620 |
| H  | 1.077453  | 4.329305  | 1.795848  | C            | 7.621681  | -0.222931 | 1.005954  |
| H  | 0.825122  | 4.027596  | 3.529279  | C            | 8.952087  | -1.199871 | -1.237809 |
| H  | 1.875349  | 2.953456  | 2.574635  | H            | 7.002896  | -1.367354 | -2.132291 |
| C  | -1.523112 | 3.513876  | 2.138230  | C            | 9.009245  | -0.360568 | 1.022954  |
| H  | -1.794678 | 3.858663  | 3.142294  | H            | 7.109864  | 0.183079  | 1.874253  |
| H  | -1.365610 | 4.393694  | 1.506162  | C            | 9.681730  | -0.848949 | -0.099631 |
| H  | -2.357710 | 2.942118  | 1.726506  | H            | 9.463641  | -1.589861 | -2.114086 |
| Cu | -1.726169 | -0.873486 | -0.562474 | H            | 9.567178  | -0.076862 | 1.911766  |
| C  | 0.314286  | -1.343864 | -0.107778 | H            | 10.763151 | -0.955508 | -0.087424 |
| H  | 0.252093  | -1.809125 | 0.873035  |              |           |           |           |
| C  | 1.051372  | 0.002051  | -0.198800 | <b>INT4A</b> |           |           |           |
| H  | 0.772595  | 0.502933  | -1.133671 | C            | 1.049840  | -2.280184 | 0.000227  |
| B  | 0.525007  | 0.890345  | 0.989918  | C            | -0.282631 | -2.542153 | 0.000194  |
| C  | 2.569964  | -0.139287 | -0.175320 | C            | -0.038695 | -0.287567 | 0.000091  |
| C  | 3.239738  | -0.585862 | 0.974525  | N            | 1.179567  | -0.900286 | 0.000086  |
| C  | 3.337301  | 0.159512  | -1.307627 | H            | 1.898397  | -2.945076 | 0.000274  |
| C  | 4.624465  | -0.727284 | 0.987240  | H            | -0.818308 | -3.478958 | 0.000217  |
| H  | 2.664315  | -0.826718 | 1.864084  | C            | 2.460844  | -0.177847 | -0.000011 |
| C  | 4.723994  | 0.020189  | -1.296351 | C            | 3.270464  | -0.472248 | 1.271582  |
| H  | 2.840745  | 0.507225  | -2.210655 | C            | 3.270457  | -0.472538 | -1.271542 |
| C  | 5.397194  | -0.426031 | -0.147859 | H            | 2.184487  | 0.881863  | -0.000131 |
| H  | 5.115629  | -1.098892 | 1.882791  | C            | 4.585443  | 0.323181  | 1.267691  |
| H  | 5.295371  | 0.283304  | -2.182609 | H            | 3.493650  | -1.547964 | 1.321210  |
| C  | 0.373952  | -2.242313 | -1.159053 | H            | 2.665082  | -0.227024 | 2.152189  |
| F  | 0.998301  | -1.944294 | -2.283609 | C            | 4.585434  | 0.322896  | -1.267838 |
| F  | 0.333829  | -3.546410 | -0.956446 | H            | 3.493652  | -1.548263 | -1.320929 |
| F  | -1.373645 | -2.244614 | -2.007541 | H            | 2.665071  | -0.227517 | -2.152202 |

|          |           |           |           |   |           |           |           |
|----------|-----------|-----------|-----------|---|-----------|-----------|-----------|
| C        | 5.406876  | 0.041231  | -0.000045 | C | -3.029995 | -1.536576 | -0.764966 |
| H        | 5.167169  | 0.082311  | 2.165393  | C | -2.661677 | -2.105276 | 0.655312  |
| H        | 4.354910  | 1.396821  | 1.320586  | O | -2.378456 | -0.888247 | 1.409911  |
| H        | 5.167155  | 0.081828  | -2.165491 | O | -2.264415 | -0.298161 | -0.805444 |
| H        | 4.354897  | 1.396523  | -1.320970 | C | -3.781097 | -2.865794 | 1.356903  |
| H        | 6.322982  | 0.644090  | -0.000117 | H | -4.077202 | -3.742602 | 0.769871  |
| H        | 5.721991  | -1.012996 | 0.000072  | H | -3.435563 | -3.210785 | 2.336432  |
| C        | -2.405379 | -1.177068 | 0.000053  | H | -4.658615 | -2.234258 | 1.510804  |
| C        | -2.907853 | -0.478069 | 1.273795  | C | -1.365063 | -2.923280 | 0.660941  |
| C        | -2.907592 | -0.477623 | -1.273542 | H | -1.066373 | -3.104447 | 1.697714  |
| H        | -2.789429 | -2.205413 | -0.000145 | H | -1.494908 | -3.888823 | 0.161577  |
| C        | -4.440210 | -0.369792 | 1.265816  | H | -0.555042 | -2.376934 | 0.167461  |
| H        | -2.470362 | 0.527180  | 1.321724  | C | -4.505980 | -1.144302 | -0.897239 |
| H        | -2.553873 | -1.026817 | 2.155383  | H | -4.633610 | -0.558280 | -1.812090 |
| C        | -4.439952 | -0.369319 | -1.265835 | H | -5.152341 | -2.026231 | -0.952927 |
| H        | -2.470051 | 0.527630  | -1.321018 | H | -4.824944 | -0.523445 | -0.055725 |
| H        | -2.553445 | -1.026071 | -2.155251 | C | -2.600132 | -2.408479 | -1.939916 |
| C        | -4.939361 | 0.343598  | 0.000074  | H | -3.089746 | -3.387854 | -1.893918 |
| H        | -4.773398 | 0.162403  | 2.164436  | H | -2.887279 | -1.926568 | -2.879740 |
| H        | -4.881032 | -1.377264 | 1.314258  | H | -1.518129 | -2.556052 | -1.952906 |
| H        | -4.772949 | 0.163217  | -2.164325 | C | -1.277953 | 1.406374  | 0.881602  |
| H        | -4.880780 | -1.376765 | -1.314746 | H | -1.416646 | 1.576810  | 1.957933  |
| H        | -6.035019 | 0.394155  | -0.000028 | B | -2.024817 | 0.065077  | 0.493186  |
| H        | -4.570229 | 1.378829  | 0.000306  | C | 0.195090  | 1.093411  | 0.640646  |
| N        | -0.934044 | -1.319651 | 0.000139  | C | 0.712528  | 1.029489  | -0.661865 |
| Cu       | -0.403269 | 1.551763  | -0.000142 | C | 1.054120  | 0.797645  | 1.705971  |
| F        | -0.838950 | 3.260303  | -0.000269 | C | 2.045447  | 0.698834  | -0.886399 |
|          |           |           |           | H | 0.056134  | 1.237225  | -1.502333 |
| <b>9</b> |           |           |           | C | 2.387503  | 0.461742  | 1.481736  |



|                   |           |           |           |             |           |           |           |
|-------------------|-----------|-----------|-----------|-------------|-----------|-----------|-----------|
| H                 | 0.671098  | 0.822050  | 2.723485  | H           | -1.526481 | -0.020891 | -1.542075 |
| C                 | 2.912499  | 0.408142  | 0.180692  | H           | 1.742696  | 1.308284  | -0.055027 |
| H                 | 2.427744  | 0.685840  | -1.903451 | H           | 0.745105  | 1.334682  | -1.540180 |
| H                 | 3.025667  | 0.215667  | 2.326101  | H           | 0.196217  | 2.170185  | -0.056113 |
| C                 | 4.332988  | 0.054217  | -0.060172 | H           | 0.785088  | -1.308424 | -1.542187 |
| C                 | 5.348029  | 0.517302  | 0.794162  | H           | 1.780761  | -1.255603 | -0.056200 |
| C                 | 4.700791  | -0.753473 | -1.149771 | H           | 0.260883  | -2.163263 | -0.060043 |
| C                 | 6.682802  | 0.184272  | 0.567927  |             |           |           |           |
| H                 | 5.088463  | 1.165494  | 1.626640  | <b>TS5A</b> |           |           |           |
| C                 | 6.035489  | -1.084902 | -1.378296 | C           | -3.302389 | 0.579449  | 2.348230  |
| H                 | 3.928985  | -1.144021 | -1.807364 | C           | -3.362644 | 1.790889  | 1.734709  |
| C                 | 7.033094  | -0.617970 | -0.520011 | C           | -1.287611 | 0.944802  | 1.381736  |
| H                 | 7.451895  | 0.560592  | 1.237527  | N           | -2.028434 | 0.081114  | 2.132650  |
| H                 | 6.295692  | -1.716880 | -2.223522 | H           | -4.047986 | 0.030366  | 2.902064  |
| H                 | 8.073532  | -0.876529 | -0.697401 | H           | -4.168479 | 2.502659  | 1.663618  |
| C                 | -1.740283 | 2.621440  | 0.111148  | C           | -1.549581 | -1.216551 | 2.655976  |
| H                 | -1.028319 | 3.404039  | -0.129560 | C           | -1.235643 | -2.191555 | 1.514856  |
| C                 | -2.989500 | 2.822038  | -0.280087 | C           | -0.354337 | -1.021928 | 3.603592  |
| F                 | -4.003887 | 1.982905  | -0.056407 | H           | -2.388608 | -1.617894 | 3.238392  |
| F                 | -3.423406 | 3.888512  | -0.943167 | C           | -0.707272 | -3.528193 | 2.050793  |
|                   |           |           |           | H           | -0.474889 | -1.752326 | 0.861155  |
| <sup>t</sup> O'Bu |           |           |           | H           | -2.130053 | -2.327796 | 0.899227  |
| O                 | -0.000769 | -0.001528 | 1.484366  | C           | 0.156344  | -2.372444 | 4.126915  |
| C                 | -0.000108 | -0.000190 | 0.160491  | H           | 0.452122  | -0.524074 | 3.051537  |
| C                 | -1.461287 | -0.021421 | -0.437820 | H           | -0.642581 | -0.355918 | 4.427056  |
| C                 | 0.712037  | 1.276900  | -0.435971 | C           | 0.509365  | -3.308156 | 2.961479  |
| C                 | 0.749918  | -1.254164 | -0.437911 | H           | -0.441078 | -4.171069 | 1.203089  |
| H                 | -1.977757 | -0.914869 | -0.059272 | H           | -1.498597 | -4.049983 | 2.610412  |
| H                 | -2.003715 | 0.855367  | -0.056559 | H           | 1.029654  | -2.208411 | 4.770213  |

|   |           |           |           |    |          |           |           |
|---|-----------|-----------|-----------|----|----------|-----------|-----------|
| H | -0.614797 | -2.842011 | 4.756210  | H  | 2.277839 | 1.191433  | 3.278475  |
| H | 0.884526  | -4.266566 | 3.342508  | H  | 3.437695 | 2.537025  | 3.137123  |
| H | 1.309206  | -2.852254 | 2.364658  | H  | 1.938201 | 2.542025  | 2.180523  |
| C | -1.691798 | 3.201658  | 0.431528  | H  | 5.264810 | 0.829161  | 2.593026  |
| C | -2.786348 | 3.770545  | -0.477534 | H  | 4.087464 | -0.500474 | 2.681142  |
| C | -1.144038 | 4.265762  | 1.393831  | H  | 5.062103 | -0.263736 | 1.209031  |
| H | -0.866525 | 2.863086  | -0.200239 | C  | 4.037418 | -1.998107 | -1.388687 |
| C | -2.232169 | 4.961084  | -1.277171 | C  | 3.129937 | -2.871305 | -0.427979 |
| H | -3.635376 | 4.114577  | 0.130172  | O  | 2.111350 | -1.935883 | -0.000729 |
| H | -3.158362 | 2.984525  | -1.143180 | O  | 3.802357 | -0.654737 | -0.912288 |
| C | -0.599193 | 5.464173  | 0.600473  | C  | 2.456945 | -4.070573 | -1.095013 |
| H | -1.949285 | 4.590361  | 2.068440  | H  | 3.205751 | -4.801526 | -1.421232 |
| H | -0.359494 | 3.816679  | 2.014784  | H  | 1.792384 | -4.559414 | -0.374691 |
| C | -1.664558 | 6.042809  | -0.344274 | H  | 1.859029 | -3.780530 | -1.960032 |
| H | -3.020011 | 5.377867  | -1.915343 | C  | 3.868929 | -3.352365 | 0.830196  |
| H | -1.438356 | 4.604782  | -1.949537 | H  | 3.151515 | -3.830830 | 1.503076  |
| H | -0.235994 | 6.235571  | 1.289798  | H  | 4.649529 | -4.081071 | 0.586929  |
| H | 0.268683  | 5.135356  | 0.009799  | H  | 4.325660 | -2.517261 | 1.365701  |
| H | -1.241901 | 6.865952  | -0.932621 | C  | 3.630937 | -2.074956 | -2.868470 |
| H | -2.484050 | 6.468821  | 0.253484  | H  | 4.097166 | -1.239111 | -3.398070 |
| N | -2.122910 | 1.995506  | 1.150127  | H  | 3.964426 | -3.015503 | -3.320251 |
| O | 2.415489  | 0.354769  | 0.813234  | H  | 2.551210 | -1.996750 | -3.009191 |
| C | 3.453452  | 1.169712  | 1.452820  | C  | 5.538424 | -2.269784 | -1.275387 |
| C | 4.027601  | 2.158949  | 0.437532  | H  | 5.772170 | -3.304062 | -1.552372 |
| C | 2.733995  | 1.905412  | 2.584523  | H  | 6.078591 | -1.602856 | -1.955006 |
| C | 4.536240  | 0.246837  | 2.018014  | H  | 5.905236 | -2.087560 | -0.262909 |
| H | 4.461670  | 1.629337  | -0.412652 | Cu | 0.460990 | 0.677870  | 0.694488  |
| H | 3.242093  | 2.820831  | 0.063506  | B  | 2.603453 | -0.632319 | -0.204928 |
| H | 4.803828  | 2.770880  | 0.911593  | C  | 1.081103 | 0.236706  | -1.762800 |

|              |           |           |           |   |           |           |           |
|--------------|-----------|-----------|-----------|---|-----------|-----------|-----------|
| H            | 1.769688  | -0.370632 | -2.337205 | C | 2.822410  | -3.402467 | 0.367719  |
| C            | -0.300075 | -0.257366 | -1.871364 | C | 1.478878  | -3.568663 | 0.488683  |
| C            | -1.441690 | 0.578506  | -1.961263 | C | 1.850426  | -1.403277 | -0.073745 |
| C            | -0.562940 | -1.649728 | -1.849829 | N | 3.031659  | -2.076732 | 0.023581  |
| C            | -2.731429 | 0.072056  | -1.867107 | H | 3.635583  | -4.101045 | 0.492411  |
| H            | -1.311324 | 1.647586  | -2.096907 | H | 0.897521  | -4.440298 | 0.742330  |
| C            | -1.852960 | -2.155010 | -1.796588 | C | 4.361851  | -1.469048 | -0.174707 |
| H            | 0.277874  | -2.330878 | -1.789970 | C | 4.523490  | -0.921496 | -1.601804 |
| C            | -2.976438 | -1.306768 | -1.748110 | C | 4.646454  | -0.391839 | 0.885369  |
| H            | -3.576405 | 0.755410  | -1.921714 | H | 5.078359  | -2.289032 | -0.036635 |
| H            | -1.994972 | -3.230876 | -1.718693 | C | 5.914857  | -0.299991 | -1.795244 |
| C            | -4.341304 | -1.832221 | -1.541424 | H | 3.752721  | -0.158135 | -1.771808 |
| C            | -4.765073 | -3.040828 | -2.124856 | H | 4.344290  | -1.726375 | -2.325415 |
| C            | -5.258001 | -1.141341 | -0.724522 | C | 6.036731  | 0.227178  | 0.677460  |
| C            | -6.049066 | -3.536876 | -1.903236 | H | 3.881075  | 0.390057  | 0.813200  |
| H            | -4.084246 | -3.580529 | -2.777596 | H | 4.557216  | -0.833366 | 1.885747  |
| C            | -6.544844 | -1.633275 | -0.509502 | C | 6.188069  | 0.787458  | -0.744902 |
| H            | -4.939250 | -0.225954 | -0.232148 | H | 5.994302  | 0.113064  | -2.807809 |
| C            | -6.948703 | -2.835239 | -1.096228 | H | 6.682738  | -1.084229 | -1.714243 |
| H            | -6.352777 | -4.469719 | -2.372149 | H | 6.200351  | 1.015719  | 1.421288  |
| H            | -7.231889 | -1.082466 | 0.129080  | H | 6.810474  | -0.536024 | 0.851333  |
| H            | -7.950464 | -3.220849 | -0.926232 | H | 7.191771  | 1.207214  | -0.884222 |
| C            | 1.346311  | 1.667788  | -1.946181 | H | 5.474151  | 1.611804  | -0.885256 |
| H            | 0.628900  | 2.402784  | -1.592387 | C | -0.541180 | -2.047335 | 0.288870  |
| C            | 2.458750  | 2.210036  | -2.437949 | C | -1.356631 | -2.943013 | -0.653525 |
| F            | 3.509402  | 1.535502  | -2.917947 | C | -1.042647 | -2.140878 | 1.737534  |
| F            | 2.721121  | 3.529167  | -2.438779 | H | -0.643887 | -1.010302 | -0.047363 |
|              |           |           |           | C | -2.847780 | -2.575320 | -0.576317 |
| <b>INT5A</b> |           |           |           | H | -1.223430 | -3.996995 | -0.368002 |

|    |           |           |           |             |           |           |           |
|----|-----------|-----------|-----------|-------------|-----------|-----------|-----------|
| H  | -0.978218 | -2.834019 | -1.677211 | H           | -5.376305 | 1.320833  | -2.367533 |
| C  | -2.532636 | -1.776307 | 1.807060  | C           | -6.693812 | 0.024903  | 1.031169  |
| H  | -0.888454 | -3.164628 | 2.109391  | H           | -4.708010 | 0.358468  | 1.770175  |
| H  | -0.445266 | -1.471489 | 2.368381  | C           | -7.550266 | 0.070209  | -0.071155 |
| C  | -3.374261 | -2.650903 | 0.865216  | H           | -7.717654 | 0.585575  | -2.159243 |
| H  | -3.426411 | -3.237208 | -1.231877 | H           | -7.058816 | -0.332401 | 1.990993  |
| H  | -2.983675 | -1.553723 | -0.952052 | H           | -8.585847 | -0.245116 | 0.023367  |
| H  | -2.889982 | -1.867280 | 2.840285  | C           | 1.346510  | 3.374284  | -0.006419 |
| H  | -2.644897 | -0.723885 | 1.519247  | H           | 1.171157  | 4.409512  | -0.303843 |
| H  | -4.421491 | -2.329729 | 0.894930  | C           | 2.013974  | 3.255475  | 1.133753  |
| H  | -3.344336 | -3.694993 | 1.212760  | F           | 2.465371  | 4.275898  | 1.866247  |
| N  | 0.902651  | -2.339224 | 0.212453  | F           | 2.350527  | 2.105278  | 1.738399  |
| Cu | 1.491426  | 0.443049  | -0.474191 |             |           |           |           |
| C  | 0.814083  | 2.253713  | -0.851588 | <b>TS6A</b> |           |           |           |
| H  | 1.031223  | 2.484310  | -1.904212 | C           | 2.871758  | 3.350061  | 0.275365  |
| C  | -0.652847 | 1.987660  | -0.712267 | C           | 1.525567  | 3.537148  | 0.237857  |
| C  | -1.367943 | 2.201740  | 0.485186  | C           | 1.910450  | 1.310104  | 0.090701  |
| C  | -1.385220 | 1.426949  | -1.784125 | N           | 3.091204  | 1.985715  | 0.184237  |
| C  | -2.713063 | 1.863535  | 0.605637  | H           | 3.681478  | 4.058499  | 0.360215  |
| H  | -0.852146 | 2.649283  | 1.330534  | H           | 0.938832  | 4.440472  | 0.280661  |
| C  | -2.725004 | 1.083421  | -1.660612 | C           | 4.431813  | 1.361144  | 0.163230  |
| H  | -0.869345 | 1.236334  | -2.723630 | C           | 4.618409  | 0.384859  | 1.335998  |
| C  | -3.430271 | 1.286409  | -0.457724 | C           | 4.713449  | 0.692418  | -1.192630 |
| H  | -3.225286 | 2.075630  | 1.541071  | H           | 5.136627  | 2.192347  | 0.292778  |
| H  | -3.230240 | 0.622857  | -2.506103 | C           | 6.014084  | -0.257184 | 1.299036  |
| C  | -4.849549 | 0.885891  | -0.319868 | H           | 3.863650  | -0.405711 | 1.267712  |
| C  | -5.731536 | 0.935984  | -1.415940 | H           | 4.449975  | 0.914603  | 2.281866  |
| C  | -5.363784 | 0.425349  | 0.907639  | C           | 6.109065  | 0.050582  | -1.209275 |
| C  | -7.059946 | 0.530763  | -1.295269 | H           | 3.954894  | -0.081561 | -1.361507 |

|    |           |           |           |              |           |           |           |
|----|-----------|-----------|-----------|--------------|-----------|-----------|-----------|
| H  | 4.608329  | 1.434923  | -1.993734 | C            | 0.419524  | -2.263664 | 0.548878  |
| C  | 6.273860  | -0.944311 | -0.050299 | H            | 0.749694  | -2.463993 | 1.566565  |
| H  | 6.103062  | -0.977387 | 2.120643  | C            | 2.713294  | -2.594725 | -0.433833 |
| H  | 6.780168  | 0.514464  | 1.469867  | F            | 3.491191  | -3.058403 | -1.433997 |
| H  | 6.267918  | -0.450034 | -2.171640 | F            | 3.359879  | -2.748443 | 0.753432  |
| H  | 6.877491  | 0.834738  | -1.130188 | C            | -0.995367 | -2.001122 | 0.361350  |
| H  | 7.280377  | -1.379987 | -0.065456 | C            | -1.839527 | -1.848369 | 1.490354  |
| H  | 5.562716  | -1.770101 | -0.177779 | C            | -1.619442 | -1.839643 | -0.902264 |
| C  | -0.493545 | 2.010869  | 0.046662  | C            | -3.184739 | -1.533855 | 1.366886  |
| C  | -1.247113 | 2.571934  | 1.260297  | H            | -1.408150 | -1.959867 | 2.483067  |
| C  | -1.078042 | 2.529062  | -1.275185 | C            | -2.968034 | -1.528898 | -1.018864 |
| H  | -0.582724 | 0.919506  | 0.063735  | H            | -1.034842 | -1.955873 | -1.811383 |
| C  | -2.740772 | 2.220634  | 1.163343  | C            | -3.792818 | -1.350970 | 0.108374  |
| H  | -1.127361 | 3.664752  | 1.296695  | H            | -3.774086 | -1.388978 | 2.269119  |
| H  | -0.807901 | 2.165562  | 2.179385  | H            | -3.399131 | -1.437961 | -2.013073 |
| C  | -2.572220 | 2.182105  | -1.364949 | C            | -5.212312 | -0.958058 | -0.016445 |
| H  | -0.942097 | 3.619344  | -1.330684 | C            | -6.179170 | -1.406381 | 0.903773  |
| H  | -0.522168 | 2.089993  | -2.112954 | C            | -5.644346 | -0.104757 | -1.051102 |
| C  | -3.352450 | 2.718497  | -0.155027 | C            | -7.512674 | -1.013616 | 0.800410  |
| H  | -3.276527 | 2.647483  | 2.019745  | H            | -5.883332 | -2.091317 | 1.693422  |
| H  | -2.855663 | 1.131521  | 1.225322  | C            | -6.979268 | 0.283104  | -1.159003 |
| H  | -2.989576 | 2.577056  | -2.299553 | H            | -4.919404 | 0.277926  | -1.763508 |
| H  | -2.674424 | 1.090448  | -1.401022 | C            | -7.922673 | -0.166186 | -0.231847 |
| H  | -4.400575 | 2.404967  | -0.219817 | H            | -8.237299 | -1.380913 | 1.523050  |
| H  | -3.341398 | 3.819029  | -0.172464 | H            | -7.281129 | 0.947742  | -1.964897 |
| N  | 0.954619  | 2.280403  | 0.130071  | H            | -8.962585 | 0.138366  | -0.313430 |
| Cu | 1.573558  | -0.550859 | -0.065369 |              |           |           |           |
| C  | 1.330681  | -2.573353 | -0.514163 | <b>INT6A</b> |           |           |           |
| H  | 0.966933  | -2.670931 | -1.535910 | C            | 3.507157  | 3.180831  | 0.388983  |

|   |           |           |           |    |           |           |           |
|---|-----------|-----------|-----------|----|-----------|-----------|-----------|
| C | 2.156271  | 3.327953  | 0.356198  | C  | -1.911051 | 2.084372  | -1.325493 |
| C | 2.609974  | 1.125465  | 0.068530  | H  | -0.295866 | 3.518900  | -1.125704 |
| N | 3.766441  | 1.831951  | 0.212146  | H  | 0.136868  | 2.101486  | -2.087970 |
| H | 4.294373  | 3.907164  | 0.521222  | C  | -2.685974 | 2.465897  | -0.054901 |
| H | 1.541516  | 4.208072  | 0.454319  | H  | -2.600873 | 2.120404  | 2.092681  |
| C | 5.119780  | 1.241476  | 0.182526  | H  | -2.178922 | 0.721294  | 1.114246  |
| C | 5.326034  | 0.251733  | 1.341001  | H  | -2.333241 | 2.590602  | -2.202445 |
| C | 5.417667  | 0.594776  | -1.180115 | H  | -2.018923 | 1.005824  | -1.496455 |
| H | 5.806604  | 2.085948  | 0.322607  | H  | -3.735964 | 2.165071  | -0.147828 |
| C | 6.740777  | -0.345862 | 1.303366  | H  | -2.675357 | 3.560134  | 0.063792  |
| H | 4.586264  | -0.554696 | 1.250451  | N  | 1.625931  | 2.062808  | 0.161386  |
| H | 5.133903  | 0.758882  | 2.294552  | Cu | 2.341851  | -0.770422 | -0.176623 |
| C | 6.831504  | -0.005535 | -1.203127 | C  | 0.324603  | -2.492175 | -0.587051 |
| H | 4.679833  | -0.198352 | -1.360266 | H  | 0.099031  | -2.228438 | -1.619050 |
| H | 5.289534  | 1.340317  | -1.974659 | C  | -0.626072 | -2.472913 | 0.372225  |
| C | 7.026957  | -1.006133 | -0.053880 | H  | -0.315109 | -2.724930 | 1.384430  |
| H | 6.852649  | -1.072228 | 2.116677  | C  | 1.777567  | -2.627046 | -0.327327 |
| H | 7.480496  | 0.448477  | 1.485361  | F  | 2.377414  | -3.377295 | -1.344230 |
| H | 7.007495  | -0.490170 | -2.170516 | F  | 1.993538  | -3.348409 | 0.852857  |
| H | 7.574795  | 0.801190  | -1.114226 | C  | -2.012693 | -2.039258 | 0.220191  |
| H | 8.045871  | -1.411365 | -0.072114 | C  | -2.830265 | -1.921187 | 1.361960  |
| H | 6.342196  | -1.854551 | -0.193693 | C  | -2.583652 | -1.662158 | -1.013968 |
| C | 0.184779  | 1.764996  | 0.047366  | C  | -4.120779 | -1.406503 | 1.286894  |
| C | -0.574503 | 2.157597  | 1.323060  | H  | -2.425709 | -2.207131 | 2.330267  |
| C | -0.418200 | 2.428365  | -1.200079 | C  | -3.872460 | -1.151118 | -1.088912 |
| H | 0.124913  | 0.677796  | -0.069756 | H  | -2.007577 | -1.767776 | -1.928695 |
| C | -2.065822 | 1.809429  | 1.187418  | C  | -4.668001 | -0.990752 | 0.061579  |
| H | -0.462929 | 3.238019  | 1.496734  | H  | -4.698605 | -1.284610 | 2.199110  |
| H | -0.127721 | 1.643974  | 2.182984  | H  | -4.280131 | -0.882059 | -2.059719 |

|             |           |           |           |    |           |           |           |
|-------------|-----------|-----------|-----------|----|-----------|-----------|-----------|
| C           | -6.018128 | -0.386493 | -0.016249 | C  | -6.189239 | -1.115610 | -0.038203 |
| C           | -7.067401 | -0.838627 | 0.803394  | H  | -5.952237 | -1.075276 | -2.201536 |
| C           | -6.283433 | 0.670215  | -0.906374 | H  | -6.723988 | 0.361577  | -1.530487 |
| C           | -8.331501 | -0.253905 | 0.739133  | H  | -6.293314 | -0.673986 | 2.094886  |
| H           | -6.894606 | -1.673071 | 1.477324  | H  | -6.921304 | 0.602778  | 1.056728  |
| C           | -7.548058 | 1.253828  | -0.972859 | H  | -7.167292 | -1.611103 | -0.065539 |
| H           | -5.483036 | 1.050156  | -1.535302 | H  | -5.431104 | -1.902078 | 0.081064  |
| C           | -8.578689 | 0.795616  | -0.149061 | C  | 0.464384  | 1.989025  | -0.039107 |
| H           | -9.128601 | -0.625966 | 1.377669  | C  | 1.104554  | 2.200817  | -1.419899 |
| H           | -7.726105 | 2.074144  | -1.663493 | C  | 1.140736  | 2.843250  | 1.042096  |
| H           | -9.564245 | 1.250451  | -0.199422 | H  | 0.564947  | 0.934077  | 0.236703  |
|             |           |           |           | C  | 2.615301  | 1.927666  | -1.367994 |
| <b>TS6B</b> |           |           |           | H  | 0.927496  | 3.236859  | -1.744692 |
| C           | -2.911157 | 3.261062  | -0.423921 | H  | 0.612438  | 1.544685  | -2.148041 |
| C           | -1.566918 | 3.457356  | -0.422886 | C  | 2.649078  | 2.549452  | 1.085682  |
| C           | -1.937286 | 1.286423  | 0.108283  | H  | 0.980707  | 3.908854  | 0.820968  |
| N           | -3.123251 | 1.931128  | -0.097707 | H  | 0.670843  | 2.638663  | 2.011693  |
| H           | -3.725151 | 3.940951  | -0.623558 | C  | 3.304063  | 2.772311  | -0.286022 |
| H           | -0.984624 | 4.342723  | -0.620546 | H  | 3.060259  | 2.124392  | -2.350820 |
| C           | -4.448319 | 1.277101  | -0.118582 | H  | 2.778272  | 0.865813  | -1.150888 |
| C           | -4.562149 | 0.327986  | -1.325041 | H  | 3.125667  | 3.177638  | 1.848456  |
| C           | -4.758782 | 0.567027  | 1.208604  | H  | 2.794720  | 1.505130  | 1.390497  |
| H           | -5.172223 | 2.092202  | -0.245032 | H  | 4.368667  | 2.517023  | -0.239667 |
| C           | -5.925606 | -0.376189 | -1.357776 | H  | 3.237644  | 3.838375  | -0.552329 |
| H           | -3.768778 | -0.424175 | -1.249291 | N  | -0.988377 | 2.240850  | -0.096036 |
| H           | -4.385808 | 0.895192  | -2.247572 | Cu | -1.647218 | -0.531259 | 0.563801  |
| C           | -6.118995 | -0.144640 | 1.150485  | C  | -1.656866 | -2.612032 | 0.656563  |
| H           | -3.974783 | -0.175585 | 1.406382  | H  | -2.496307 | -2.923960 | 1.278932  |
| H           | -4.722150 | 1.292794  | 2.030202  | C  | -0.518315 | -2.139623 | 1.406776  |

|              |           |           |           |   |           |           |           |
|--------------|-----------|-----------|-----------|---|-----------|-----------|-----------|
| C            | -2.077445 | -2.503203 | -0.659958 | C | 1.817304  | 1.375895  | -0.050249 |
| F            | -3.286216 | -3.020245 | -1.008197 | N | 2.966744  | 2.112331  | -0.090748 |
| F            | -1.292197 | -2.463600 | -1.763188 | H | 3.464914  | 4.204100  | -0.321220 |
| C            | 0.860811  | -1.902783 | 1.007181  | H | 0.709951  | 4.440729  | -0.465372 |
| C            | 1.376263  | -2.053625 | -0.302483 | C | 4.334878  | 1.563582  | 0.033760  |
| C            | 1.783222  | -1.465029 | 1.993565  | C | 4.550792  | 0.894189  | 1.401548  |
| C            | 2.701616  | -1.752865 | -0.599614 | C | 4.671206  | 0.617688  | -1.131339 |
| H            | 0.729262  | -2.406548 | -1.093510 | H | 4.998042  | 2.435916  | -0.029989 |
| C            | 3.103347  | -1.175029 | 1.690660  | C | 5.975884  | 0.333140  | 1.519250  |
| H            | 1.436487  | -1.353696 | 3.019003  | H | 3.832931  | 0.071853  | 1.511304  |
| C            | 3.603630  | -1.295716 | 0.377236  | H | 4.339511  | 1.618125  | 2.198501  |
| H            | 3.036429  | -1.850456 | -1.629451 | C | 6.095734  | 0.060396  | -0.990461 |
| H            | 3.772251  | -0.867622 | 2.490709  | H | 3.959011  | -0.216763 | -1.127515 |
| C            | 4.995773  | -0.929397 | 0.039317  | H | 4.543289  | 1.150770  | -2.081839 |
| C            | 5.704491  | -1.600519 | -0.975328 | C | 6.281052  | -0.635249 | 0.366569  |
| C            | 5.656091  | 0.118081  | 0.711362  | H | 6.088140  | -0.171373 | 2.485996  |
| C            | 7.007520  | -1.235324 | -1.309645 | H | 6.701952  | 1.160654  | 1.507586  |
| H            | 5.235142  | -2.434337 | -1.489726 | H | 6.295585  | -0.637579 | -1.811972 |
| C            | 6.961609  | 0.480011  | 0.381543  | H | 6.824761  | 0.879742  | -1.086961 |
| H            | 5.130705  | 0.671247  | 1.484528  | H | 7.302610  | -1.024184 | 0.457587  |
| C            | 7.645679  | -0.192370 | -0.633930 | H | 5.596478  | -1.491439 | 0.427121  |
| H            | 7.531091  | -1.776304 | -2.094056 | C | -0.611641 | 1.957695  | -0.224153 |
| H            | 7.442225  | 1.297013  | 0.914268  | C | -1.362390 | 2.680524  | 0.905590  |
| H            | 8.662271  | 0.090608  | -0.893250 | C | -1.219174 | 2.259674  | -1.602822 |
| H            | -0.664573 | -2.227880 | 2.479633  | H | -0.657420 | 0.877692  | -0.047898 |
|              |           |           |           | C | -2.862534 | 2.352437  | 0.866996  |
| <b>INT6B</b> |           |           |           | H | -1.227993 | 3.766115  | 0.793665  |
| C            | 2.688017  | 3.457145  | -0.264652 | H | -0.920592 | 2.400653  | 1.869784  |
| C            | 1.336100  | 3.573221  | -0.334095 | C | -2.718554 | 1.925325  | -1.622125 |



|    |           |           |           |             |           |           |           |
|----|-----------|-----------|-----------|-------------|-----------|-----------|-----------|
| H  | -1.078135 | 3.325762  | -1.833654 | C           | -5.563527 | -0.184150 | -0.709735 |
| H  | -0.677575 | 1.689225  | -2.366963 | C           | -5.195753 | -0.754747 | 1.601993  |
| C  | -3.469460 | 2.669204  | -0.507448 | C           | -6.749176 | 0.462672  | -0.362968 |
| H  | -3.383081 | 2.908706  | 1.655662  | H           | -5.239064 | -0.181093 | -1.746118 |
| H  | -3.009713 | 1.288045  | 1.083743  | C           | -6.377627 | -0.102641 | 1.950885  |
| H  | -3.138971 | 2.175160  | -2.604053 | H           | -4.614427 | -1.253778 | 2.371681  |
| H  | -2.845299 | 0.843786  | -1.487105 | C           | -7.160979 | 0.511092  | 0.970762  |
| H  | -4.529065 | 2.394528  | -0.517279 | H           | -7.346548 | 0.939261  | -1.136006 |
| H  | -3.412847 | 3.753153  | -0.691045 | H           | -6.692543 | -0.083285 | 2.990979  |
| N  | 0.823691  | 2.292304  | -0.198662 | H           | -8.082702 | 1.018084  | 1.242673  |
| Cu | 1.720327  | -0.539851 | 0.141089  |             |           |           |           |
| C  | 1.457872  | -3.302946 | -0.814821 | MeOH        |           |           |           |
| H  | 2.236265  | -3.840563 | -1.356183 | C           | 0.662744  | -0.019540 | 0.000000  |
| C  | 0.194878  | -3.402582 | -1.282438 | H           | 1.080118  | 0.991444  | -0.000001 |
| H  | 0.059189  | -4.020443 | -2.169977 | H           | 1.039188  | -0.543379 | -0.893349 |
| C  | 1.976589  | -2.462451 | 0.303991  | H           | 1.039188  | -0.543378 | 0.893350  |
| F  | 3.377856  | -2.696492 | 0.342321  | O           | -0.749920 | 0.122365  | 0.000000  |
| F  | 1.523754  | -2.989469 | 1.538654  | H           | -1.135593 | -0.766367 | 0.000000  |
| C  | -1.033389 | -2.749741 | -0.824819 |             |           |           |           |
| C  | -2.142918 | -2.731378 | -1.695409 | <b>TS7A</b> |           |           |           |
| C  | -1.193766 | -2.126214 | 0.431147  | C           | -0.591592 | -1.971441 | -2.242866 |
| C  | -3.336823 | -2.112014 | -1.349318 | C           | 0.380400  | -1.022149 | -2.236101 |
| H  | -2.062011 | -3.222314 | -2.662803 | C           | -1.421649 | -0.161360 | -1.167483 |
| C  | -2.389407 | -1.497327 | 0.769974  | N           | -1.687508 | -1.428600 | -1.589991 |
| H  | -0.394033 | -2.174494 | 1.157188  | H           | -0.599353 | -2.972217 | -2.645983 |
| C  | -3.489627 | -1.472315 | -0.104946 | H           | 1.385048  | -1.049218 | -2.621346 |
| H  | -4.174828 | -2.153014 | -2.039464 | C           | -2.934834 | -2.171276 | -1.320153 |
| H  | -2.463547 | -1.013605 | 1.740264  | C           | -3.082945 | -2.470169 | 0.180640  |
| C  | -4.760104 | -0.803667 | 0.265198  | C           | -4.163773 | -1.446737 | -1.891102 |

|   |           |           |           |   |           |           |           |
|---|-----------|-----------|-----------|---|-----------|-----------|-----------|
| H | -2.823884 | -3.123280 | -1.854707 | H | 2.630710  | 4.688862  | -1.549945 |
| C | -4.379391 | -3.242240 | 0.465723  | H | 2.417288  | 3.638349  | -2.949171 |
| H | -3.088430 | -1.529776 | 0.741772  | N | -0.144219 | 0.076579  | -1.576667 |
| H | -2.207033 | -3.035223 | 0.523723  | C | -0.783584 | 0.901743  | 2.399894  |
| C | -5.450412 | -2.230444 | -1.591345 | H | -0.210303 | 1.799485  | 2.627644  |
| H | -4.229775 | -0.450153 | -1.436303 | C | -0.171355 | -0.228996 | 1.968926  |
| H | -4.031205 | -1.294872 | -2.969355 | H | -0.806829 | -1.076596 | 1.724321  |
| C | -5.601944 | -2.493497 | -0.085309 | C | -2.225282 | 1.126654  | 2.408573  |
| H | -4.478296 | -3.399125 | 1.545853  | F | -2.603453 | 1.870723  | 3.534521  |
| H | -4.327621 | -4.239645 | 0.003412  | F | -2.922003 | -0.111130 | 2.531109  |
| H | -6.314922 | -1.676719 | -1.976900 | C | 1.247454  | -0.404600 | 1.693174  |
| H | -5.428811 | -3.191311 | -2.127099 | C | 1.684633  | -1.567530 | 1.023997  |
| H | -6.518857 | -3.062357 | 0.110763  | C | 2.238352  | 0.544942  | 2.027334  |
| H | -5.703432 | -1.533180 | 0.440955  | C | 3.018385  | -1.757639 | 0.680022  |
| C | 0.553241  | 1.349262  | -1.288651 | H | 0.948825  | -2.317140 | 0.741636  |
| C | 2.066486  | 1.243556  | -1.501226 | C | 3.569723  | 0.355742  | 1.681837  |
| C | -0.035144 | 2.504681  | -2.114130 | H | 1.960329  | 1.440245  | 2.576007  |
| H | 0.365346  | 1.538779  | -0.225916 | C | 3.994912  | -0.793549 | 0.987651  |
| C | 2.743705  | 2.562905  | -1.100775 | H | 3.304287  | -2.649510 | 0.128039  |
| H | 2.275309  | 1.046927  | -2.563205 | H | 4.303912  | 1.102825  | 1.971518  |
| H | 2.475036  | 0.414966  | -0.917867 | C | 5.407165  | -0.965184 | 0.578469  |
| C | 0.640406  | 3.829937  | -1.729688 | C | 6.026492  | -2.227456 | 0.607028  |
| H | 0.119923  | 2.292200  | -3.181789 | C | 6.166967  | 0.133602  | 0.137242  |
| H | -1.117402 | 2.563071  | -1.948214 | C | 7.353422  | -2.385226 | 0.208856  |
| C | 2.167579  | 3.752200  | -1.883850 | H | 5.468309  | -3.085535 | 0.971344  |
| H | 3.825504  | 2.479556  | -1.262262 | C | 7.495189  | -0.022680 | -0.256701 |
| H | 2.599404  | 2.719756  | -0.023534 | H | 5.700763  | 1.113859  | 0.081129  |
| H | 0.232213  | 4.645022  | -2.338917 | C | 8.095420  | -1.283672 | -0.224106 |
| H | 0.391500  | 4.063799  | -0.684222 | H | 7.812865  | -3.369643 | 0.248030  |

|              |           |           |           |    |           |           |           |
|--------------|-----------|-----------|-----------|----|-----------|-----------|-----------|
| H            | 8.059819  | 0.840787  | -0.599266 | H  | -4.901962 | -1.554781 | 1.314399  |
| H            | 9.130282  | -1.406560 | -0.531886 | H  | -4.774855 | -0.019152 | -2.164651 |
| Cu           | -2.500778 | 1.007617  | -0.138747 | H  | -4.902229 | -1.556583 | -1.312897 |
| C            | -5.211234 | 1.739686  | 0.793540  | H  | -6.033006 | 0.230551  | -0.000348 |
| H            | -5.681741 | 1.544126  | -0.174081 | H  | -4.555487 | 1.196297  | -0.001169 |
| H            | -5.130049 | 0.803775  | 1.359277  | C  | 2.444777  | -0.408490 | 0.000001  |
| H            | -5.824706 | 2.453161  | 1.355168  | C  | 3.254368  | -0.702868 | 1.271520  |
| O            | -3.909061 | 2.295390  | 0.549473  | C  | 3.254191  | -0.703527 | -1.271476 |
| H            | -3.318522 | 2.121919  | 1.378669  | H  | 2.170297  | 0.651985  | -0.000255 |
|              |           |           |           | C  | 4.569268  | 0.092700  | 1.267614  |
| <b>INT7A</b> |           |           |           | H  | 3.477434  | -1.778586 | 1.321461  |
| C            | -0.306220 | -2.763586 | 0.000856  | H  | 2.648755  | -0.457428 | 2.151913  |
| C            | 1.027159  | -2.506988 | 0.000626  | C  | 4.569088  | 0.092046  | -1.268172 |
| C            | -0.054019 | -0.508333 | 0.000104  | H  | 3.477251  | -1.779271 | -1.320889 |
| N            | -0.952686 | -1.538035 | 0.000368  | H  | 2.648453  | -0.458545 | -2.151910 |
| H            | -0.845647 | -3.698285 | 0.001222  | C  | 5.390717  | -0.188726 | -0.000264 |
| H            | 1.873097  | -3.175269 | 0.000783  | H  | 5.151454  | -0.147685 | 2.165183  |
| C            | -2.422295 | -1.386247 | 0.000361  | H  | 4.338548  | 1.166439  | 1.320485  |
| C            | -2.917354 | -0.681506 | 1.273778  | H  | 5.151146  | -0.148803 | -2.165698 |
| C            | -2.917634 | -0.683210 | -1.273898 | H  | 4.338359  | 1.165757  | -1.321562 |
| H            | -2.814706 | -2.411526 | 0.001059  | H  | 6.306616  | 0.414546  | -0.000484 |
| C            | -4.448043 | -0.553092 | 1.265649  | H  | 5.706317  | -1.242778 | -0.000014 |
| H            | -2.465963 | 0.317532  | 1.323280  | N  | 1.162107  | -1.127102 | 0.000258  |
| H            | -2.571066 | -1.235573 | 2.155163  | Cu | -0.394762 | 1.345935  | -0.000222 |
| C            | -4.448319 | -0.554819 | -1.265616 | O  | -0.876557 | 3.074821  | -0.000640 |
| H            | -2.466308 | 0.315778  | -1.324864 | C  | 0.028952  | 4.138105  | 0.000309  |
| H            | -2.571521 | -1.238449 | -2.154613 | H  | -0.515901 | 5.099470  | -0.001211 |
| C            | -4.938014 | 0.165989  | -0.000422 | H  | 0.688523  | 4.151078  | 0.889891  |
| H            | -4.774375 | -0.016195 | 2.164023  | H  | 0.691659  | 4.150059  | -0.886953 |

|                  |           |           |           |           |           |           |           |
|------------------|-----------|-----------|-----------|-----------|-----------|-----------|-----------|
|                  |           |           | H         | -5.837466 | -1.490897 | 0.557100  |           |
| H <sub>2</sub> O |           |           | C         | 0.428331  | 1.474962  | -1.183527 |           |
| O                | 0.000000  | 0.000000  | 0.119712  | C         | 1.934205  | 1.322889  | -1.417847 |
| H                | 0.000000  | 0.761608  | -0.478849 | C         | -0.115729 | 2.718381  | -1.905186 |
| H                | 0.000000  | -0.761608 | -0.478849 | H         | 0.257303  | 1.584983  | -0.106701 |
|                  |           |           | C         | 2.670089  | 2.575240  | -0.918206 |           |
| <b>TS7B</b>      |           |           | H         | 2.128642  | 1.204063  | -2.493973 |           |
| C                | -0.859714 | -1.703170 | -2.400935 | H         | 2.308983  | 0.432874  | -0.906885 |
| C                | 0.147903  | -0.795070 | -2.329591 | C         | 0.620559  | 3.977711  | -1.421960 |
| C                | -1.603285 | 0.033376  | -1.154362 | H         | 0.020907  | 2.587491  | -2.988328 |
| N                | -1.924383 | -1.179572 | -1.683375 | H         | -1.192611 | 2.809975  | -1.721119 |
| H                | -0.912604 | -2.663348 | -2.890198 | C         | 2.141656  | 3.847311  | -1.597513 |
| H                | 1.143352  | -0.823809 | -2.737894 | H         | 3.746367  | 2.458836  | -1.095276 |
| C                | -3.178520 | -1.916665 | -1.433572 | H         | 2.537900  | 2.650251  | 0.169317  |
| C                | -3.246321 | -2.399533 | 0.023822  | H         | 0.243895  | 4.856162  | -1.959080 |
| C                | -4.419276 | -1.101239 | -1.825839 | H         | 0.388757  | 4.136731  | -0.358703 |
| H                | -3.130414 | -2.794513 | -2.090732 | H         | 2.647356  | 4.733216  | -1.194037 |
| C                | -4.535767 | -3.193076 | 0.279819  | H         | 2.379412  | 3.809218  | -2.670964 |
| H                | -3.208727 | -1.533400 | 0.693301  | N         | -0.323589 | 0.259380  | -1.566239 |
| H                | -2.361266 | -3.010508 | 0.242748  | C         | -0.936231 | 0.733908  | 2.490484  |
| C                | -5.701494 | -1.905836 | -1.562951 | H         | -0.344607 | 1.600245  | 2.783529  |
| H                | -4.440853 | -0.179768 | -1.229551 | C         | -0.348608 | -0.367641 | 1.962003  |
| H                | -4.344625 | -0.798865 | -2.877506 | H         | -1.000961 | -1.182855 | 1.659267  |
| C                | -5.776040 | -2.370400 | -0.100139 | C         | -2.376230 | 0.980853  | 2.536500  |
| H                | -4.578693 | -3.488445 | 1.334284  | F         | -2.722702 | 1.633214  | 3.728993  |
| H                | -4.522659 | -4.121989 | -0.310478 | F         | -3.092044 | -0.242427 | 2.558359  |
| H                | -6.576120 | -1.296516 | -1.820512 | C         | 1.064635  | -0.545521 | 1.657327  |
| H                | -5.725454 | -2.784293 | -2.225265 | C         | 1.472969  | -1.657145 | 0.890339  |
| H                | -6.688284 | -2.956276 | 0.065506  | C         | 2.076429  | 0.352943  | 2.061951  |

|              |           |           |           |   |           |           |           |
|--------------|-----------|-----------|-----------|---|-----------|-----------|-----------|
| C            | 2.801241  | -1.847200 | 0.525363  | H | 1.906282  | -2.952375 | -0.000219 |
| H            | 0.719518  | -2.364040 | 0.550213  | C | -2.399955 | -1.190509 | -0.000054 |
| C            | 3.402266  | 0.163969  | 1.695508  | C | -2.900990 | -0.491118 | 1.274023  |
| H            | 1.819284  | 1.205940  | 2.683471  | C | -2.901040 | -0.490969 | -1.274029 |
| C            | 3.799744  | -0.933898 | 0.908023  | H | -2.784467 | -2.218821 | -0.000107 |
| H            | 3.065864  | -2.695668 | -0.100538 | C | -4.432751 | -0.376087 | 1.265618  |
| H            | 4.153781  | 0.868345  | 2.041979  | H | -2.459122 | 0.511931  | 1.325049  |
| C            | 5.207110  | -1.102760 | 0.480800  | H | -2.550028 | -1.043259 | 2.154806  |
| C            | 5.798276  | -2.376482 | 0.405316  | C | -4.432801 | -0.375938 | -1.265550 |
| C            | 5.990244  | 0.011233  | 0.127489  | H | -2.459173 | 0.512085  | -1.324948 |
| C            | 7.121034  | -2.530523 | -0.008001 | H | -2.550111 | -1.043005 | -2.154891 |
| H            | 5.221601  | -3.248879 | 0.700353  | C | -4.928192 | 0.340224  | 0.000086  |
| C            | 7.314292  | -0.141733 | -0.281600 | H | -4.763719 | 0.157404  | 2.164350  |
| H            | 5.545817  | 1.002760  | 0.152535  | H | -4.878374 | -1.381609 | 1.313363  |
| C            | 7.886645  | -1.414022 | -0.352465 | H | -4.763805 | 0.157657  | -2.164206 |
| H            | 7.558711  | -3.524679 | -0.049888 | H | -4.878425 | -1.381456 | -1.313395 |
| H            | 7.897408  | 0.734030  | -0.554992 | H | -6.023692 | 0.396463  | 0.000111  |
| H            | 8.918261  | -1.534143 | -0.671980 | H | -4.553059 | 1.373186  | 0.000140  |
| Cu           | -2.583880 | 1.174605  | -0.000298 | C | 2.460885  | -0.182731 | -0.000016 |
| O            | -3.698331 | 2.699479  | 0.782323  | C | 3.272055  | -0.473535 | 1.271470  |
| H            | -3.279507 | 2.226635  | 1.608002  | C | 3.272134  | -0.473396 | -1.271483 |
| H            | -4.653074 | 2.510870  | 0.817875  | H | 2.180089  | 0.876009  | 0.000033  |
|              |           |           |           | C | 4.583663  | 0.327315  | 1.267954  |
| <b>INT7B</b> |           |           |           | H | 3.499827  | -1.548254 | 1.321270  |
| C            | -0.275354 | -2.553584 | -0.000160 | H | 2.665290  | -0.231078 | 2.151877  |
| C            | 1.056338  | -2.289178 | -0.000175 | C | 4.583741  | 0.327455  | -1.267795 |
| C            | -0.036706 | -0.296267 | -0.000062 | H | 3.499912  | -1.548110 | -1.321387 |
| N            | -0.929031 | -1.331829 | -0.000094 | H | 2.665425  | -0.230844 | -2.151903 |
| H            | -0.809217 | -3.491474 | -0.000195 | C | 5.406466  | 0.049707  | 0.000089  |

|           |           |           |           |   |           |           |           |
|-----------|-----------|-----------|-----------|---|-----------|-----------|-----------|
| H         | 5.166841  | 0.089228  | 2.165518  | H | -0.891520 | 2.391215  | 0.911675  |
| H         | 4.348616  | 1.400152  | 1.321071  | H | -1.349660 | -1.625558 | -0.564235 |
| H         | 5.166974  | 0.089469  | -2.165350 | H | 1.083102  | -1.855321 | -0.685749 |
| H         | 4.348695  | 1.400298  | -1.320808 | C | -2.767986 | 0.606963  | 0.257253  |
| H         | 6.320101  | 0.656483  | 0.000150  | H | -3.073792 | 1.574907  | 0.657778  |
| H         | 5.726176  | -1.003091 | 0.000040  | C | -3.733272 | -0.248618 | -0.106747 |
| N         | 1.182748  | -0.908262 | -0.000088 | H | -3.527645 | -1.232090 | -0.521747 |
| Cu        | -0.409612 | 1.554088  | 0.000054  | C | -5.178921 | 0.080147  | 0.021872  |
| O         | -0.959318 | 3.260275  | -0.000010 | H | 1.553146  | 2.141314  | 0.824758  |
| H         | -0.208709 | 3.874573  | -0.000090 | C | 2.984146  | -0.025675 | -0.005548 |
|           |           |           |           | C | 3.601472  | -1.239796 | 0.340802  |
| OMe       |           |           |           | C | 3.800588  | 1.042696  | -0.414448 |
| O         | 0.000000  | 0.000000  | 0.789093  | C | 4.986955  | -1.380636 | 0.280479  |
| C         | 0.000000  | 0.000000  | -0.521019 | H | 2.991299  | -2.069599 | 0.686485  |
| H         | 0.000000  | 1.029892  | -1.062210 | C | 5.186074  | 0.902199  | -0.474596 |
| H         | 0.891912  | -0.514946 | -1.062210 | H | 3.341527  | 1.980927  | -0.713542 |
| H         | -0.891912 | -0.514946 | -1.062210 | C | 5.785573  | -0.310243 | -0.127383 |
|           |           |           |           | H | 5.444110  | -2.325781 | 0.561269  |
| <b>3a</b> |           |           |           | H | 5.797759  | 1.738723  | -0.802026 |
| C         | 0.920739  | 1.320325  | 0.499485  | H | 6.865548  | -0.420050 | -0.174424 |
| C         | -0.462191 | 1.456455  | 0.558114  | F | -5.806686 | -0.853279 | 0.811526  |
| C         | -1.317402 | 0.407595  | 0.179449  | H | -5.365561 | 1.072867  | 0.449995  |
| C         | -0.725066 | -0.791265 | -0.259052 | F | -5.787635 | 0.022344  | -1.209041 |
| C         | 0.655152  | -0.927204 | -0.317742 |   |           |           |           |
| C         | 1.510901  | 0.124869  | 0.059294  |   |           |           |           |

## 8. References

1. (a) Wang, M.; Pu, X.; Zhao, Y.; Wang, P.; Li, Z.; Zhu, C.; Shi, Z. *J. Am. Chem. Soc.* **2018**, *140*, 9061; b) Mirabdolbaghi, R.; Dudding, T.; Stamatatos, T. *Org. Lett.* **2014**, *16*, 2790; c) Xu, J.; Wang, Y.-L.; Gong, T.-J.; Xiao, B.; Fu, Y. *Chem. Commun.* **2014**, *50*, 12915.
2. Gao, P.; Gao, L.; Xi, L.; Zhang, Z.; Li, S.; Shi, Z. *Org. Chem. Front.* **2020**, *7*, 2618.
3. Huang, W.; Delcourt, M.; Pannecoucke, X.; Charette, A.; Poisson, T.; Jubault, P. *Org. Lett.* **2019**, *21*, 18, 7509.
4. Cain, D. L.; McLaughlin, C.; Molloy, J. J.; Carpenter-Warren, C.; Anderson, N. A.; Watson, A. J. B. *Synlett* **2019**, *30*, 787.
5. Paioti, P. H. S.; J. del Pozo, M. S. Mikus, J. Lee, M. J. Koh, F. Romiti, S. Torker, A. H. Hoveyda, *J. Am. Chem. Soc.* **2019**, *141*, 19917.
6. Gaussian 09, Revision E.01, Frisch, M. J.; Trucks, G. W.; Schlegel, H. B.; Scuseria, G. E.; Robb, M. A.; Cheeseman, J. R.; Scalmani, G.; Barone, V.; Mennucci, B.; Petersson, G. A.; Nakatsuji, H.; Caricato, M.; Li, X.; Hratchian, H. P.; Izmaylov, A. F.; Bloino, J.; Zheng, G.; Sonnenberg, J. L.; Hada, M.; Ehara, M.; Toyota, K.; Fukuda, R.; Hasegawa, J.; Ishida, M.; Nakajima, T.; Honda, Y.; Kitao, O.; Nakai, H.; Vreven, T.; Montgomery, J. A.; Peralta, Jr., J. E.; Ogliaro, F.; Bearpark, M.; Heyd, J. J.; Brothers, E.; Kudin, K. N.; Staroverov, V. N.; Keith, T.; Kobayashi, R.; Normand, J.; Raghavachari, K.; Rendell, A.; Burant, J. C.; Iyengar, S. S.; Tomasi, J.; Cossi, M.; Rega, N.; Millam, J. M.; Klene, M.; Knox, J. E.; Cross, J. B.; Bakken, V.; Adamo, C.; Jaramillo, J.; Gomperts, R.; Stratmann, R. E.; Yazyev, O.; Austin, A. J.; Cammi, R.; Pomelli, C.; Ochterski, J. W.; Martin, R. L.; Morokuma, K.; Zakrzewski, V. G.; Voth, G. A.; Salvador, P.; Dannenberg, J. J.; Dapprich, S.; Daniels, A. D.; Farkas, O.; Foresman, J. B.; Ortiz, J. V.; Cioslowski, J.; and Fox, D. J. Gaussian, Inc., Wallingford CT, 2013.
7. a) Becke, A. D. *J. Chem. Phys.* 1993, *98*, 5648. b) Lee, C.; Yang, W.; Parr, R. G. *Phys. Rev. B*, 1988, *37*, 785.

8. a) Dolg, M.; Wedig, U.; Stoll, H.; Preuss, H. *J. Chem. Phys.* 1987, 86, 866. b) Nicklass, A.; Dolg, M.; Stoll, H.; Preuss, H. *J. Chem. Phys.* 1995, 102, 8942.
9. a) Ditchfield, R.; Hehre, W. J.; Pople, J. A. *J. Chem. Phys.* 1971, 54, 724. b) Hehre, W. J.; Ditchfield, R.; Pople, J. A. *J. Chem. Phys.* 1972, 56, 2257. c) Hariharan, P. C.; Pople, J. A. *Theor. Chem. Acc.* 1973, 28, 213.
10. a) Clark, T.; Chandrasekhar, J.; Spitznagel, G. W.; Schleyer, P. Von R. *J. Comput. Chem.* 1983, 4, 294. b) Krishnan, R.; Binkley, J. S.; Seeger, R.; Pople, J. A. *J. Chem. Phys.* 1980, 72, 650.
11. Marenich, A. V.; Cramer, C. J.; Truhlar, D. G. *J. Phys. Chem. B.* 2009, 113, 6378.
12. a) Deubel, D. V.; Lau, J. K. C. *Chem. Commun.* **2006**, 2451. b) Deubel, D. V. *J. Am. Chem. Soc.* **2008**, 130, 665. c) Lau, J. K. C.; Deubel, D. V. *J. Chem. Theory Comput.* **2006**, 2, 103. d) Plata, R. E.; Singleton, D. A. *J. Am. Chem. Soc.* **2015**, 137, 3811. e) Kua, J.; Krizner, H. E.; De Haan, D. O. *J. Phys. Chem. A* **2011**, 115, 1667.



## 9. Copies of $^1\text{H}$ , $^{13}\text{C}$ and $^{19}\text{F}$ NMR Spectra

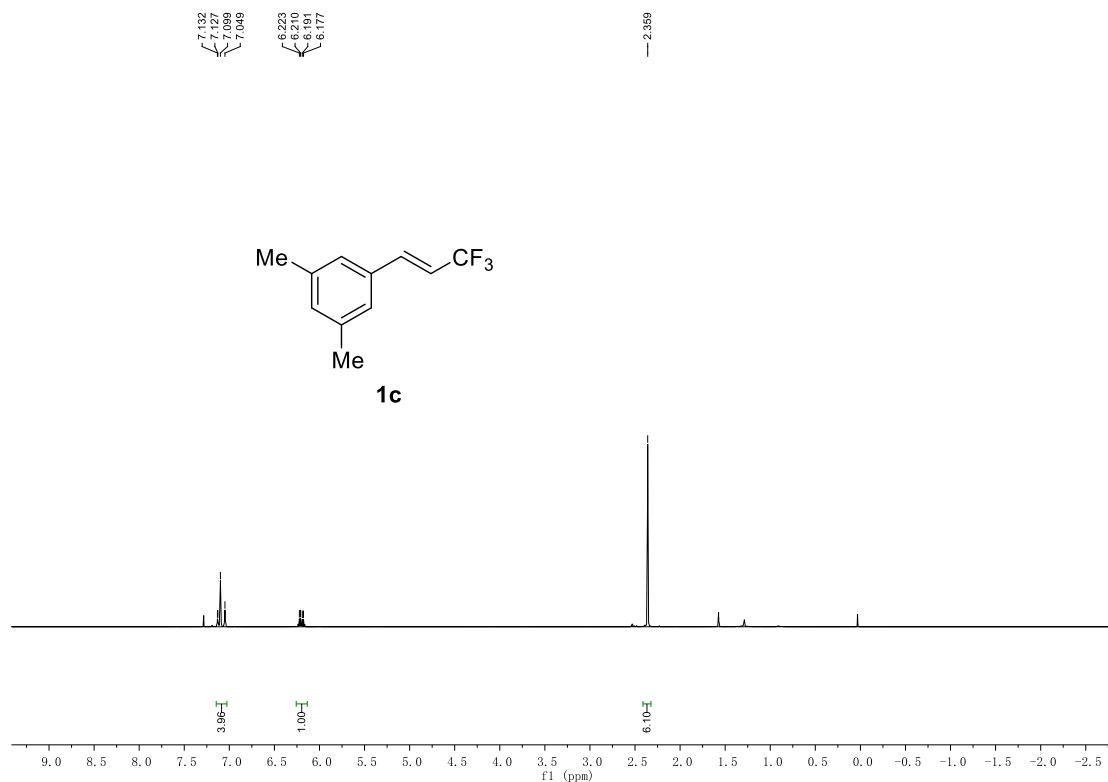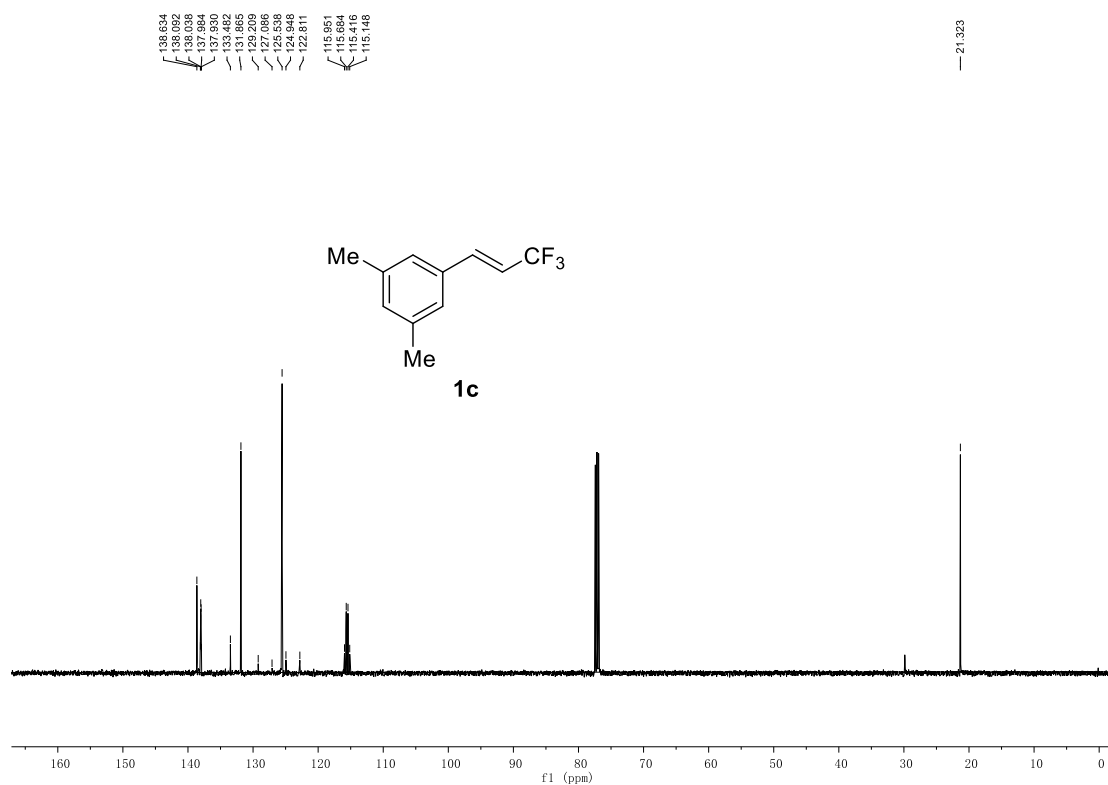

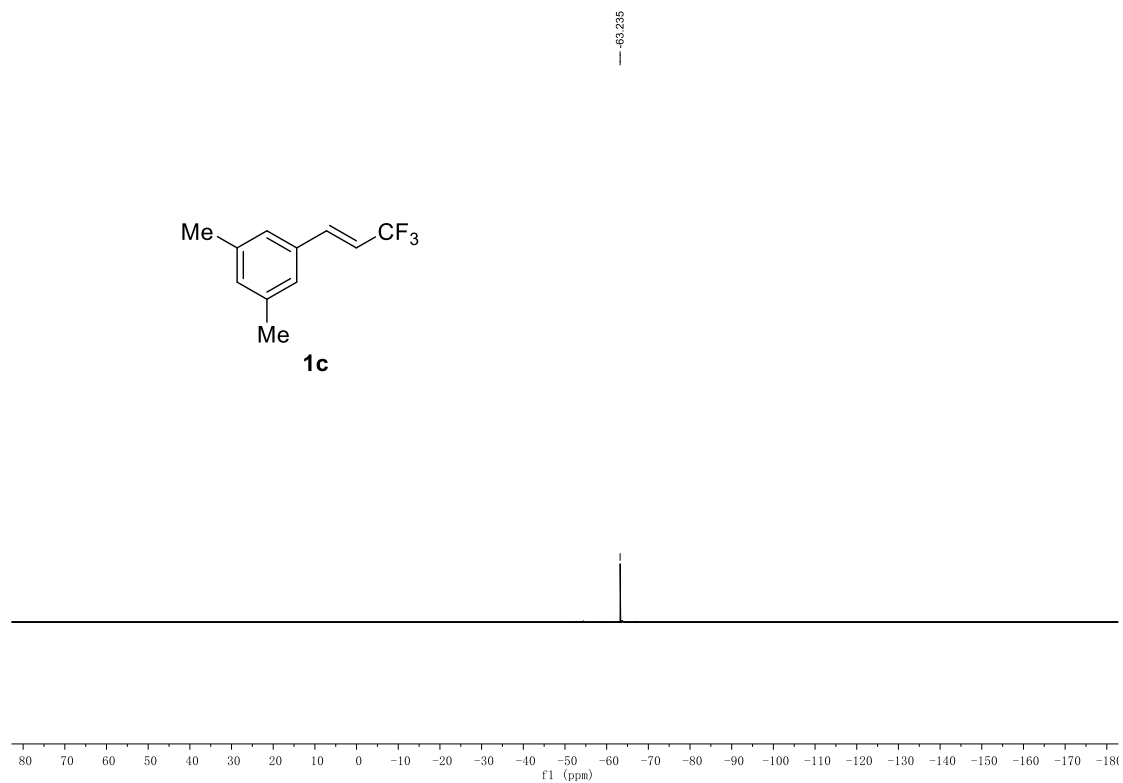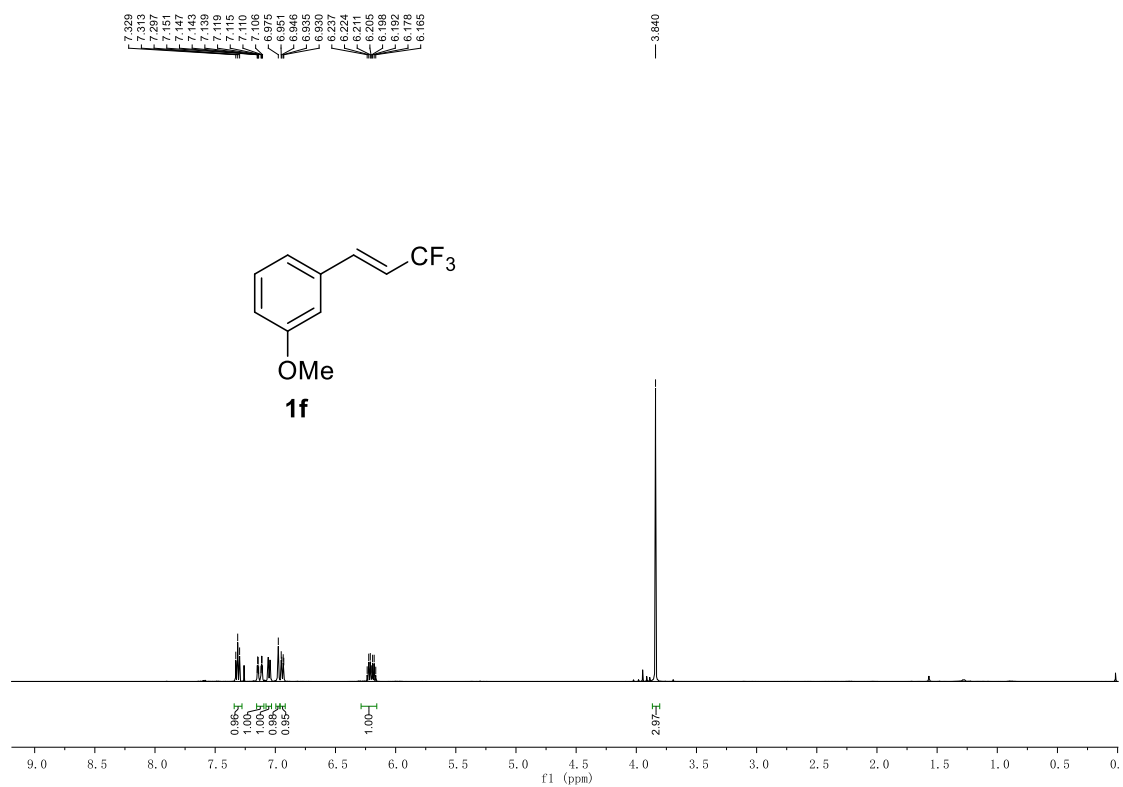

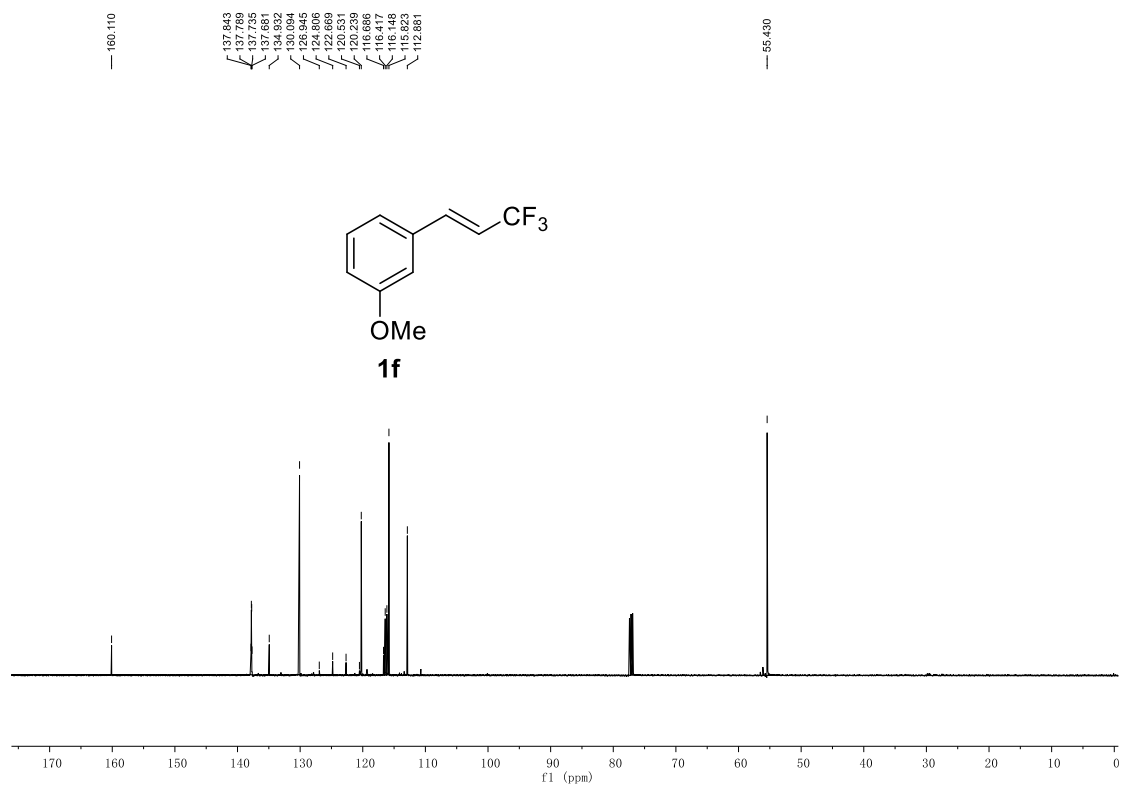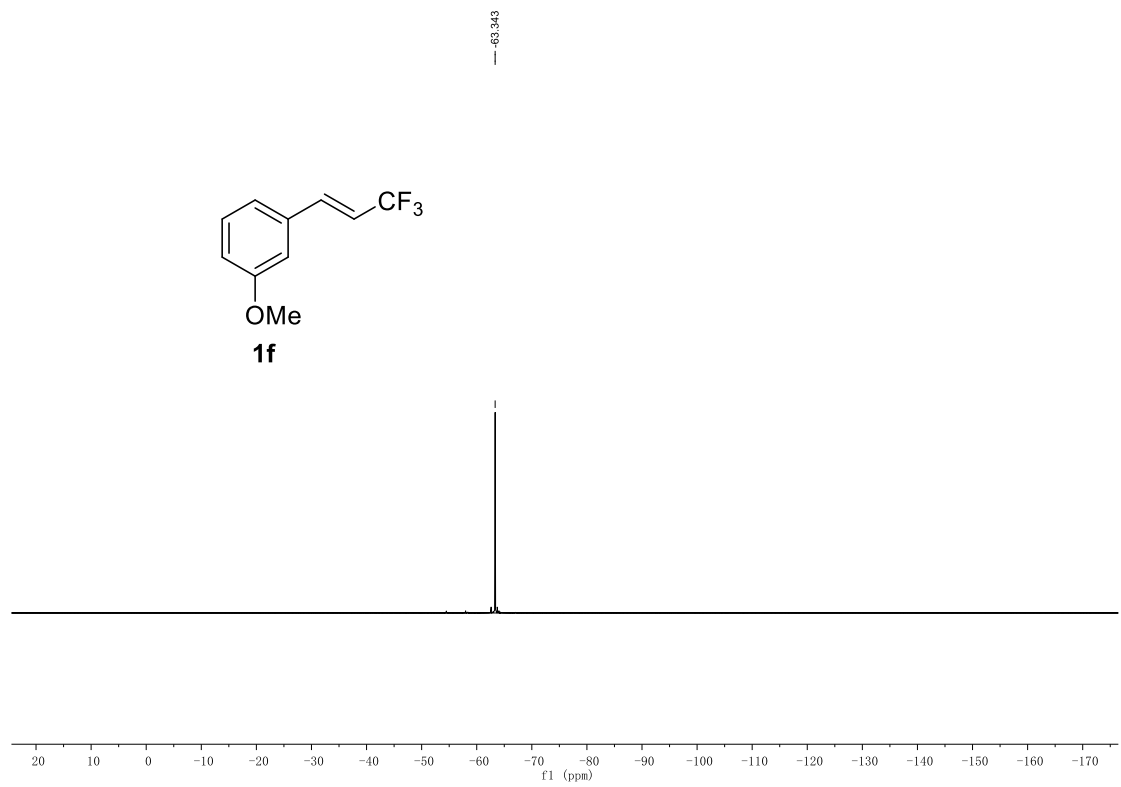

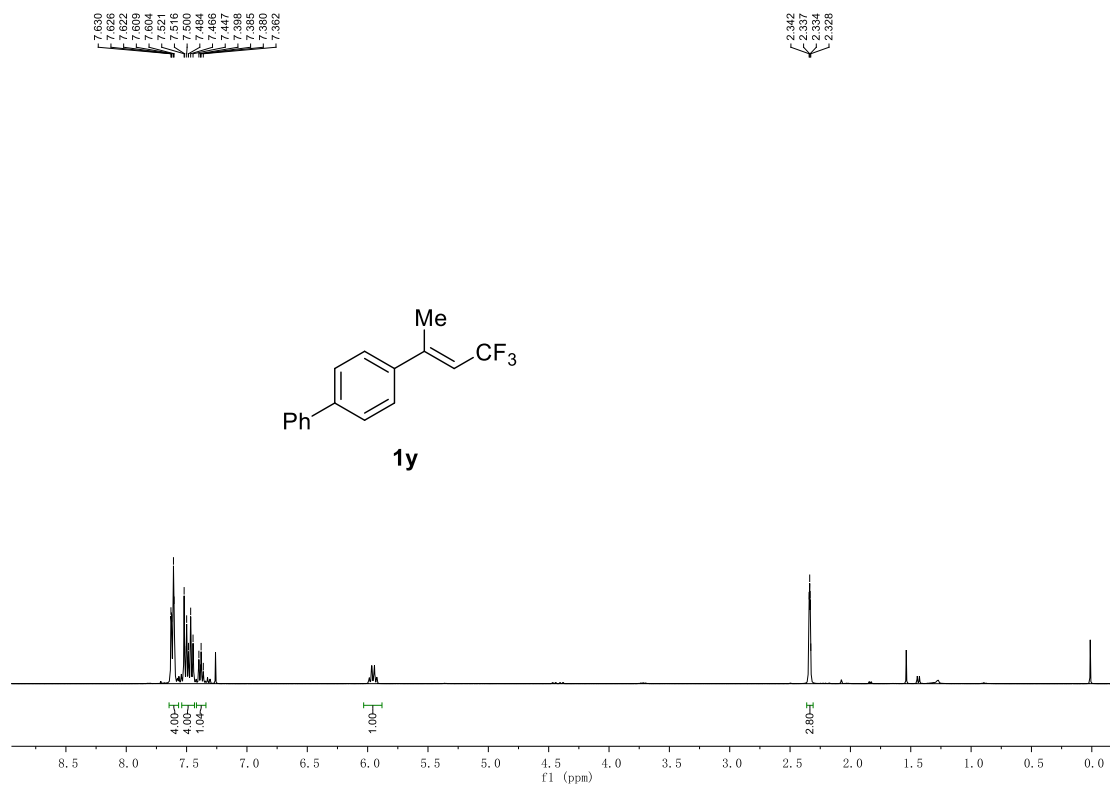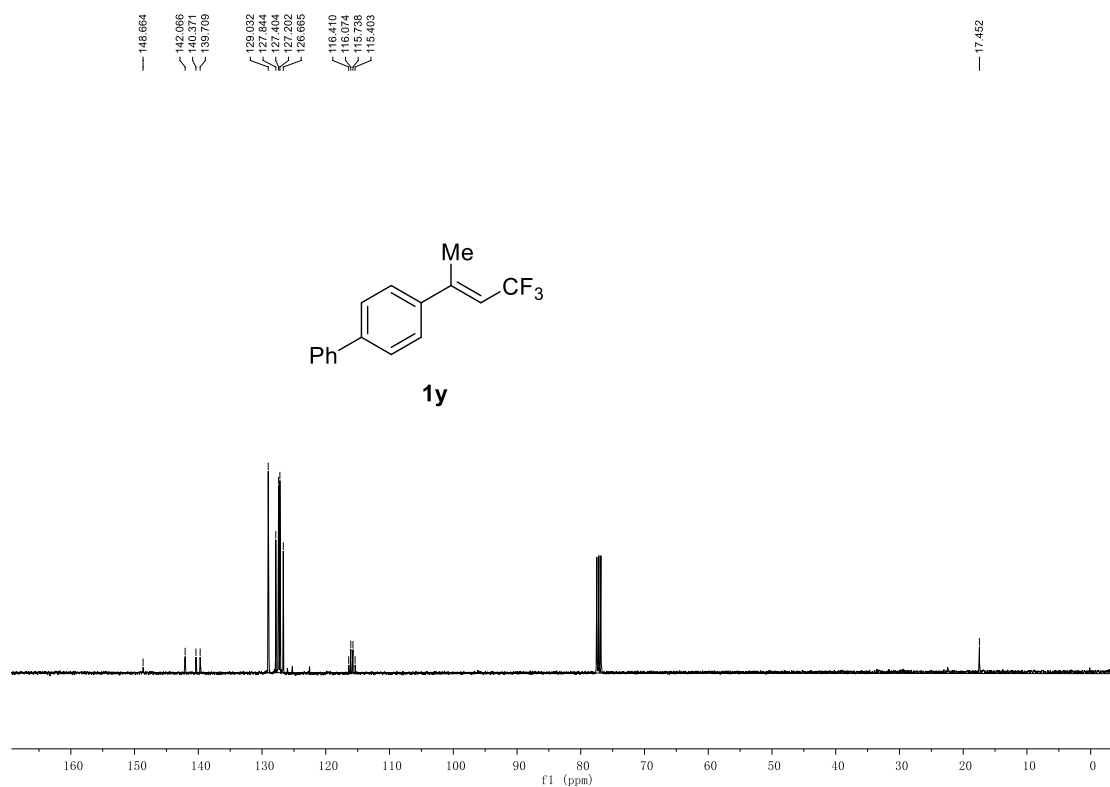

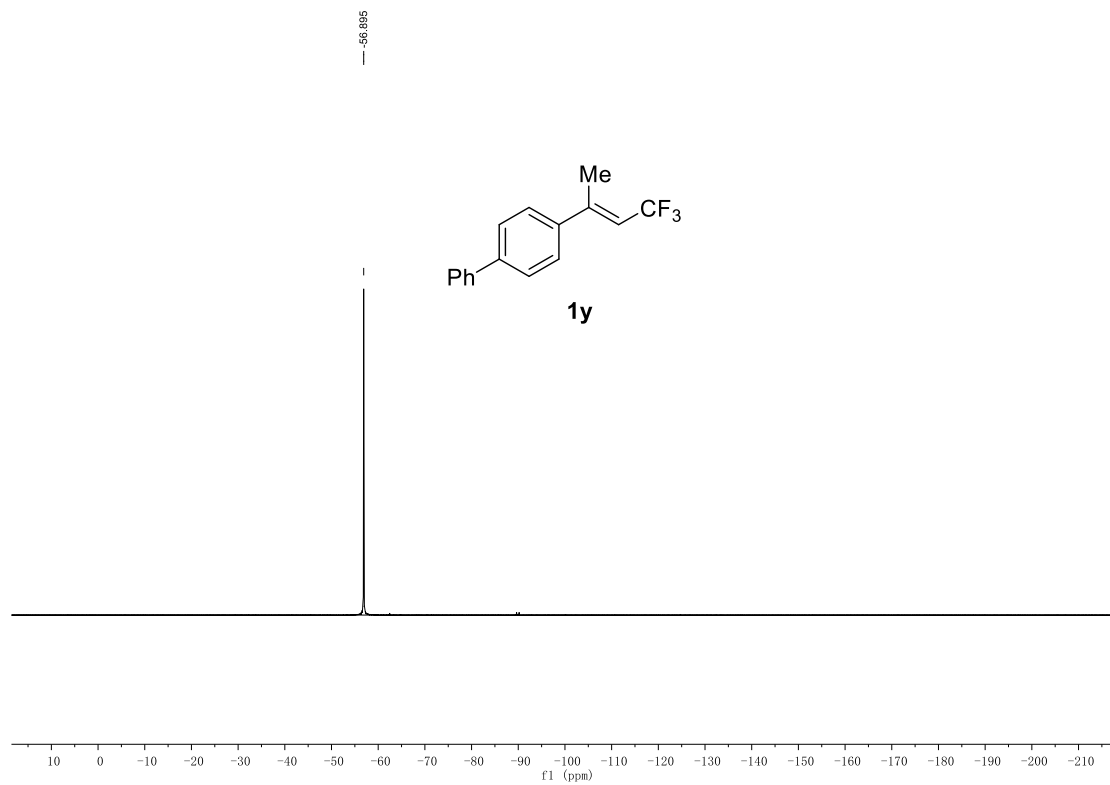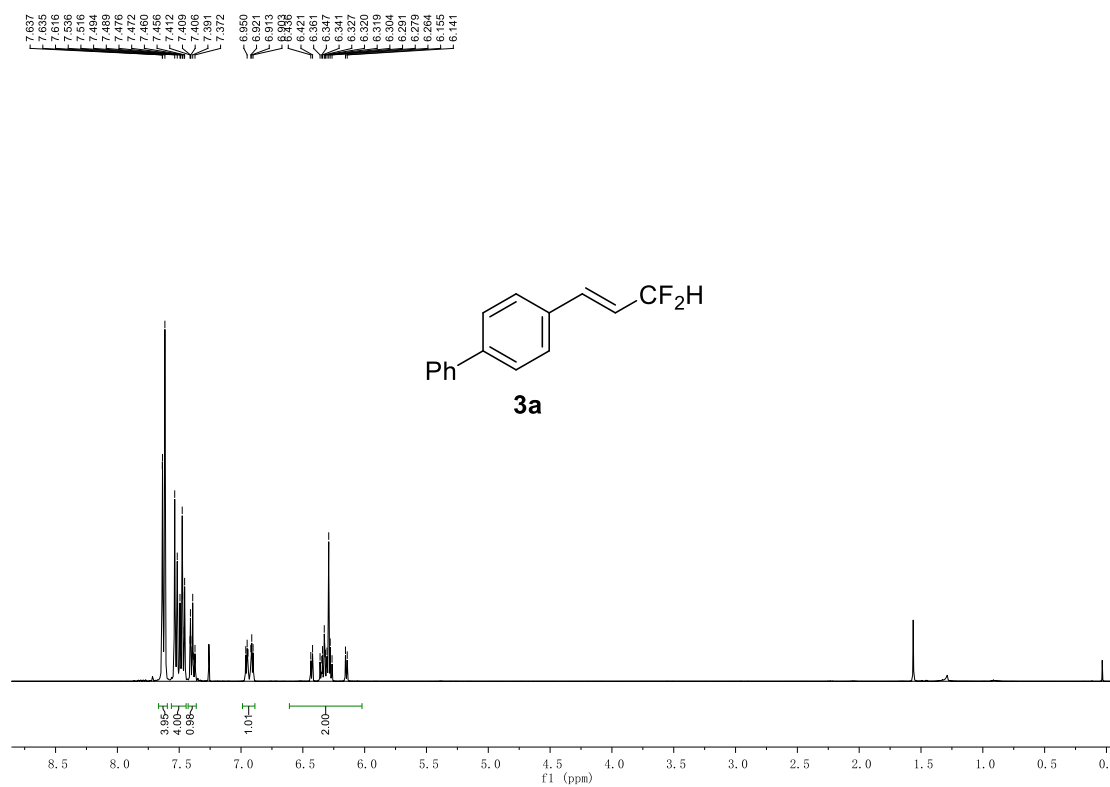

142.346  
140.402  
138.772  
136.772  
136.681  
133.531  
128.018  
127.618  
127.163  
121.232  
121.041  
119.951  
115.595  
113.677

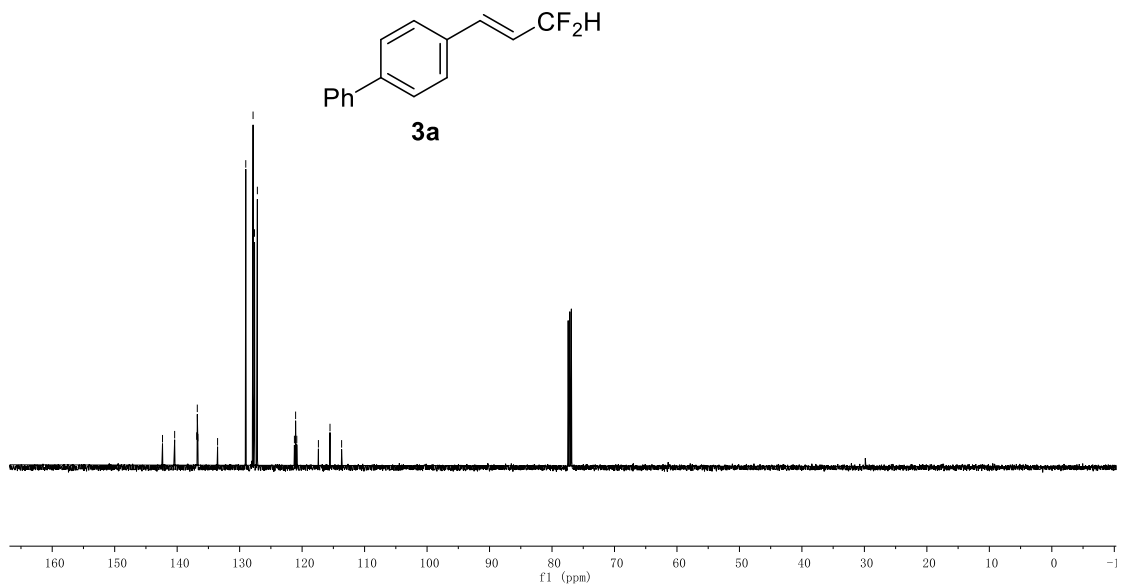

-109.602

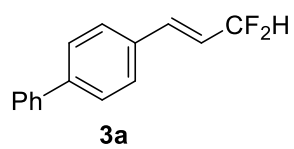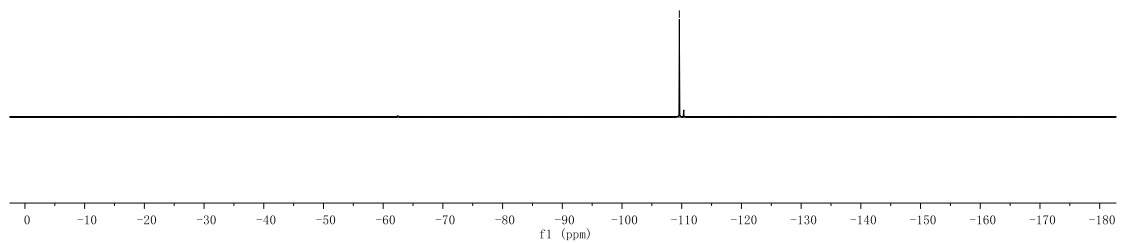

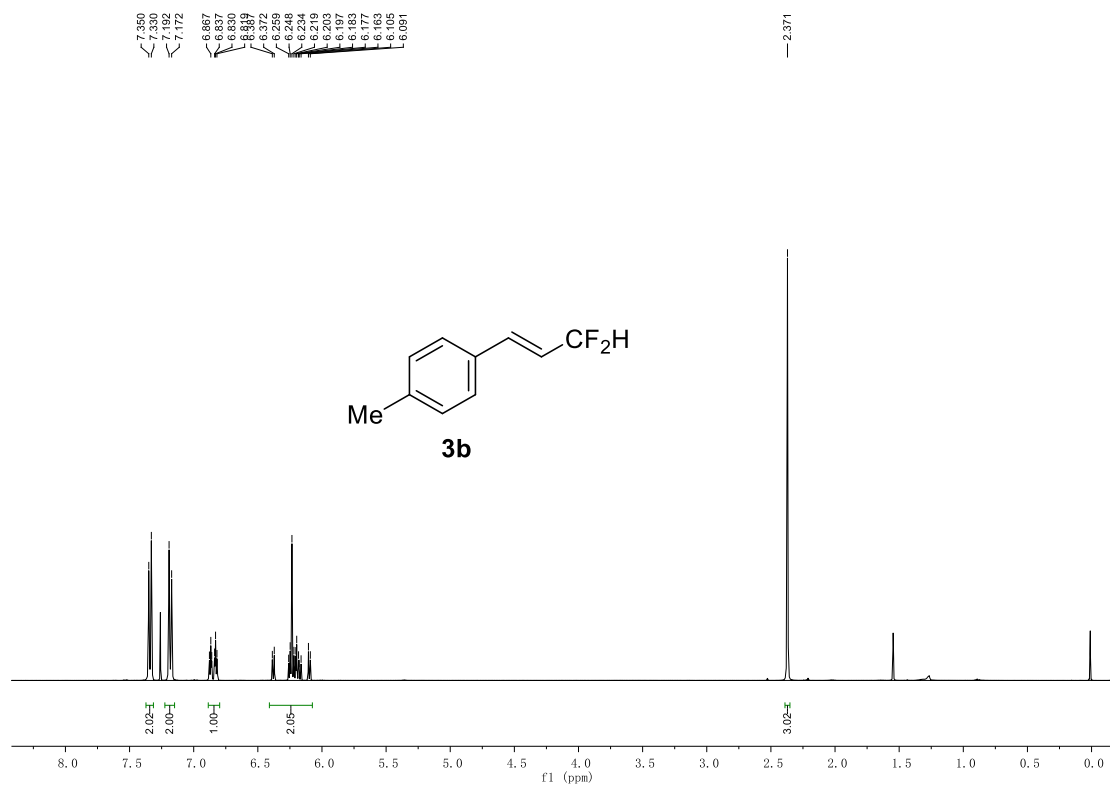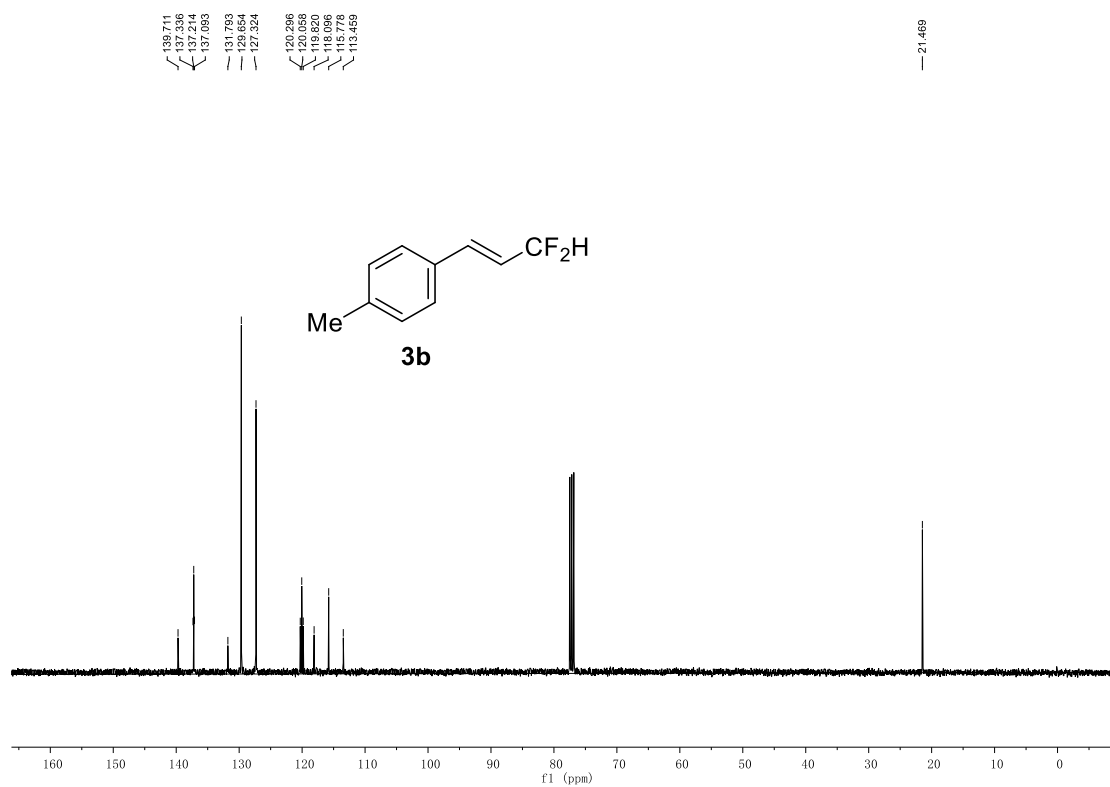

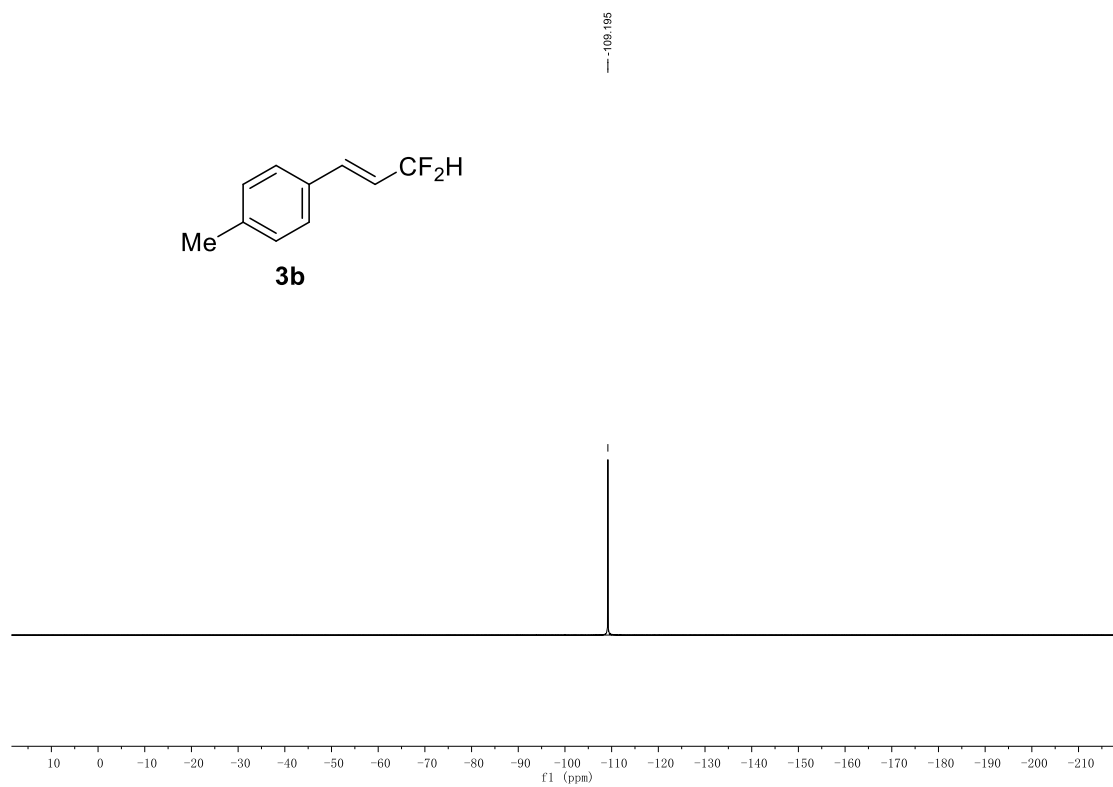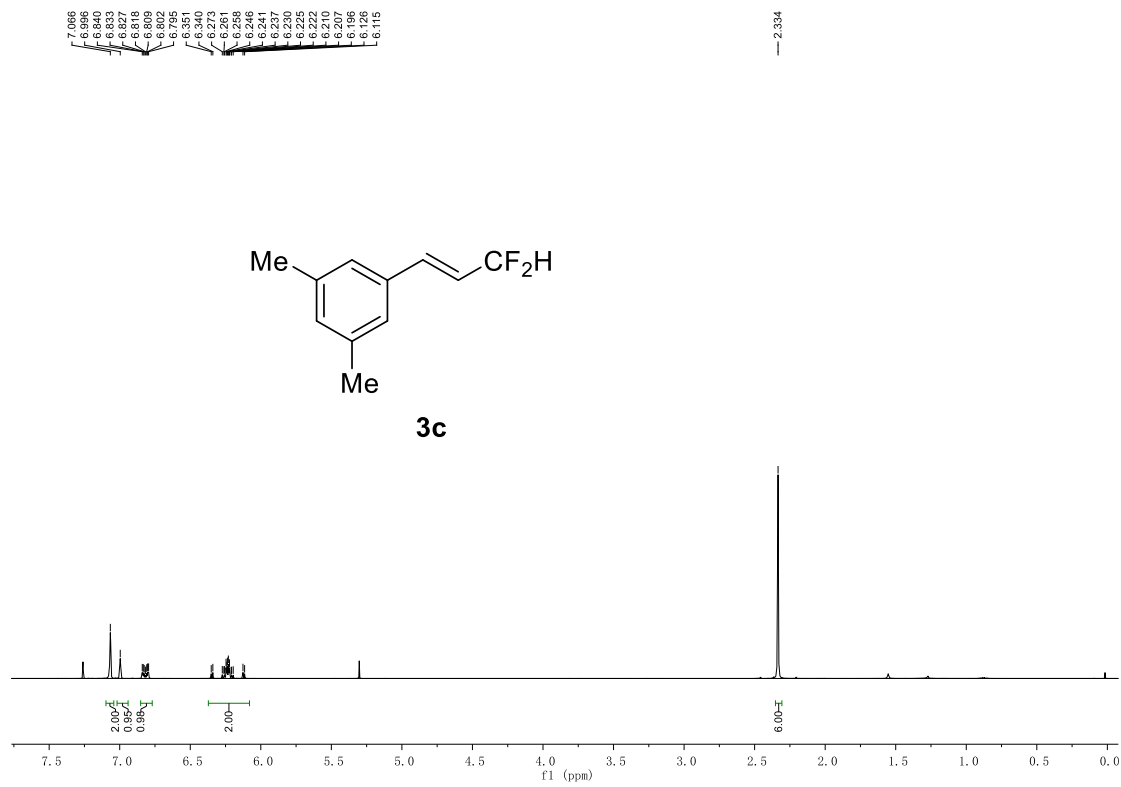



138.345  
137.466  
137.367  
137.269  
131.129  
125.126  
120.764  
120.573  
120.382  
117.777  
115.576  
113.720

21.199

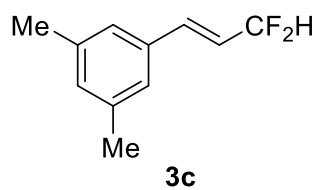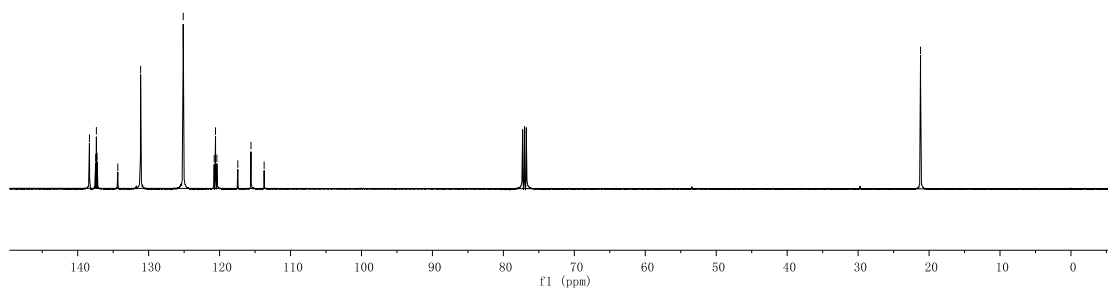

-109.373

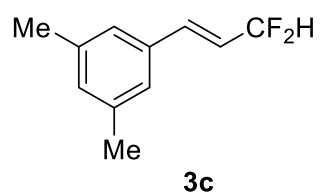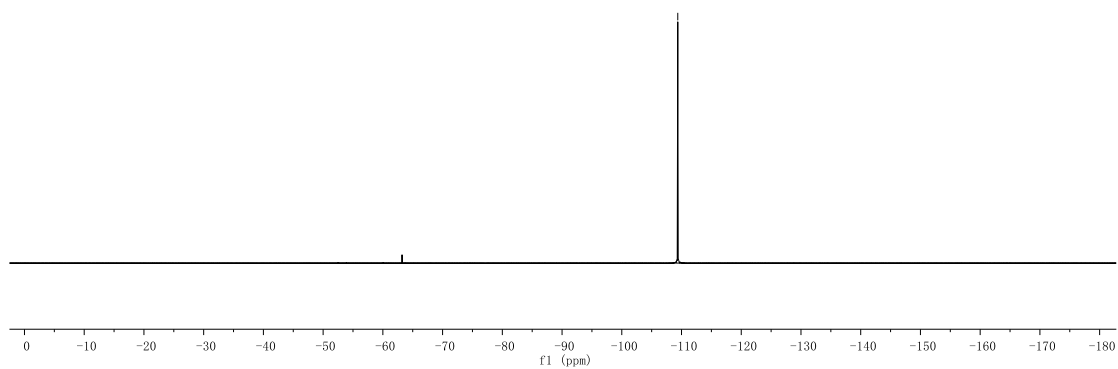

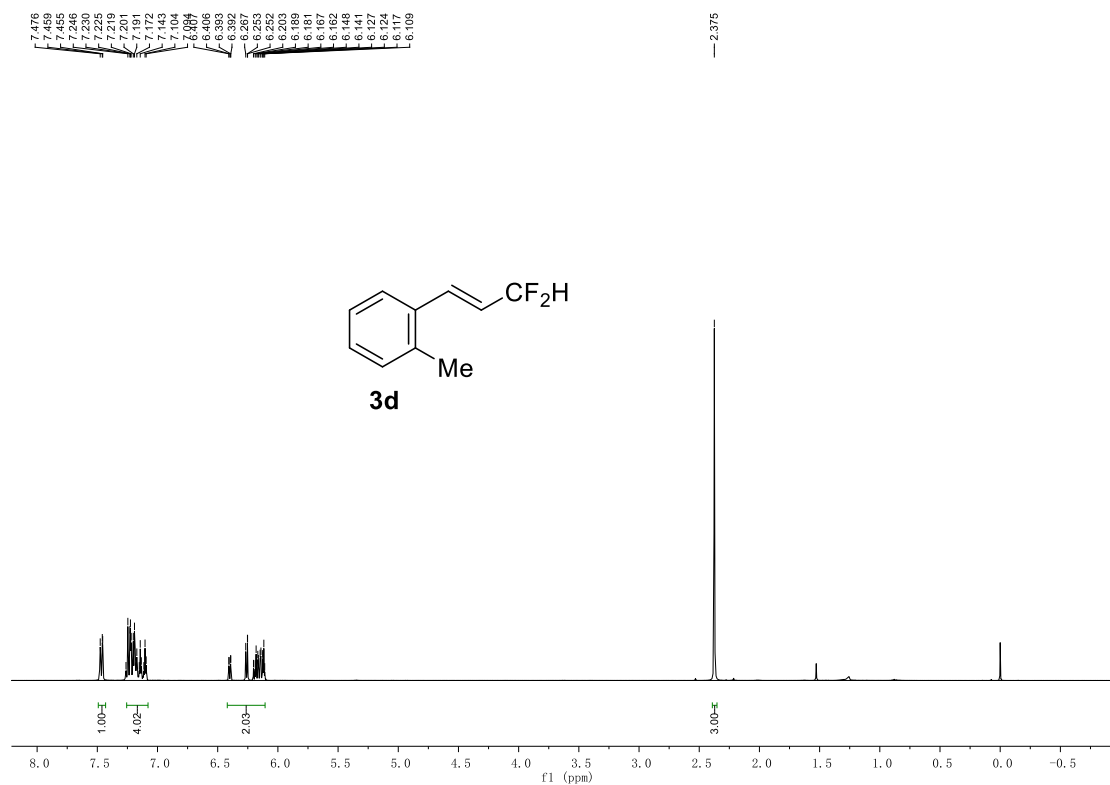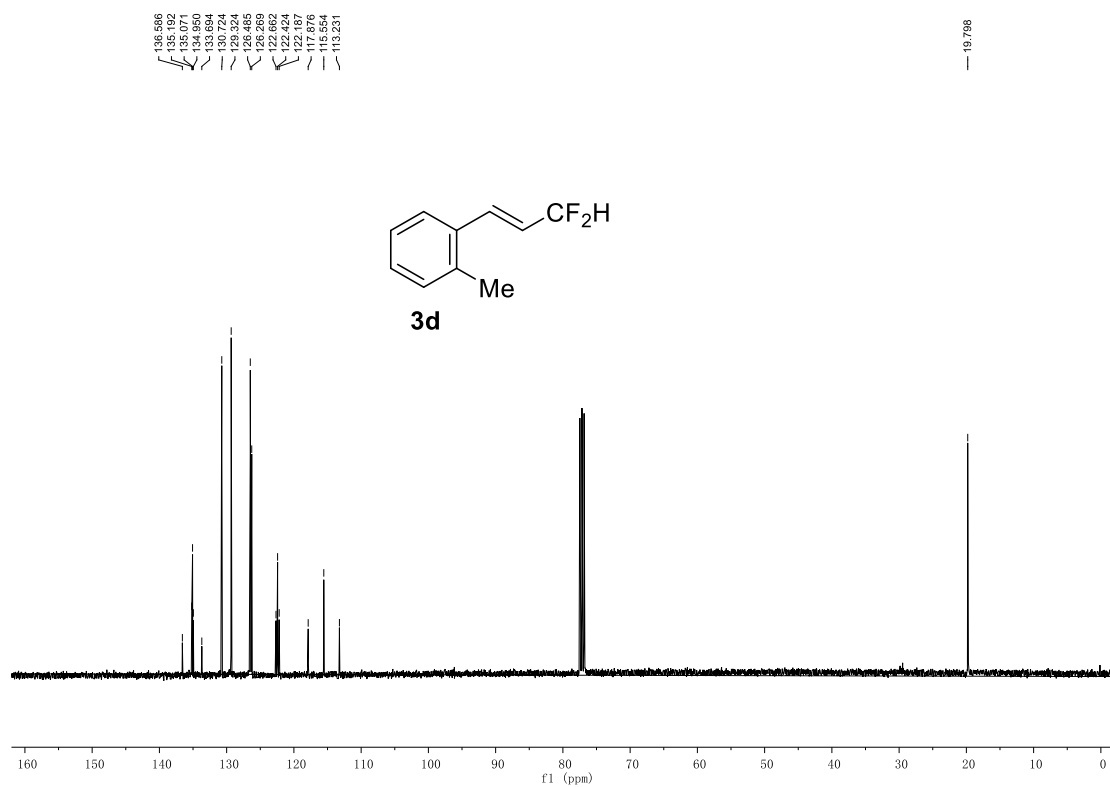

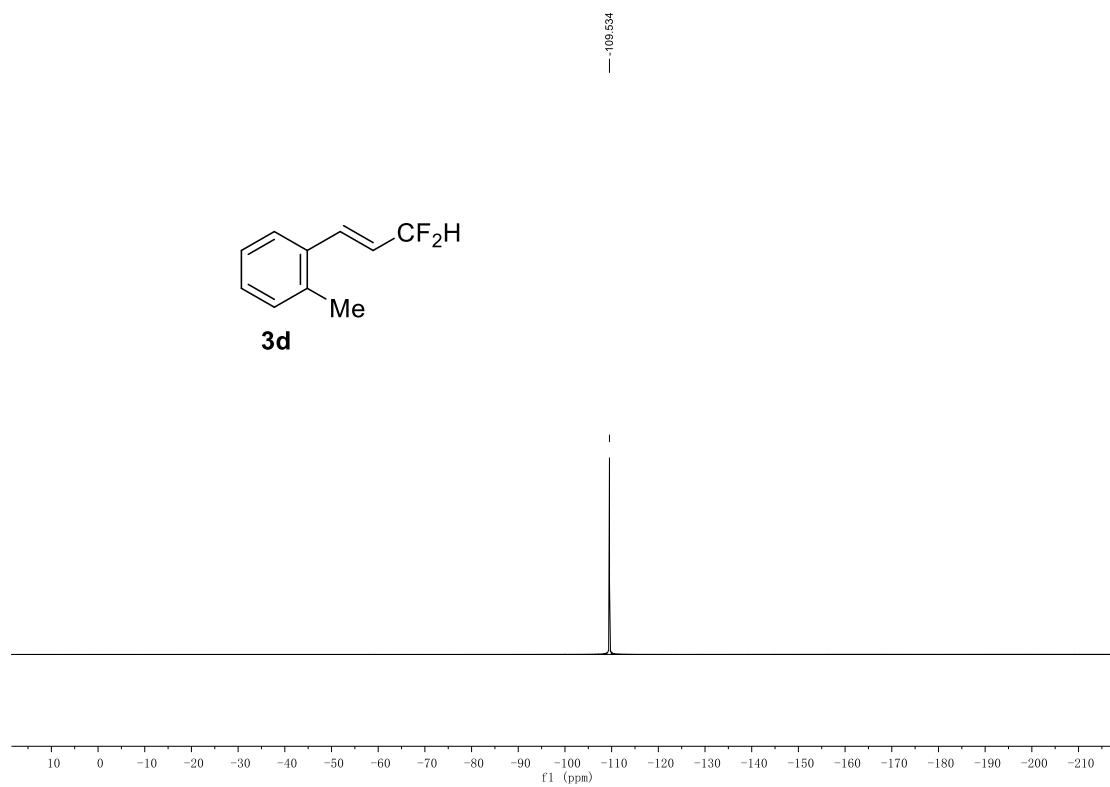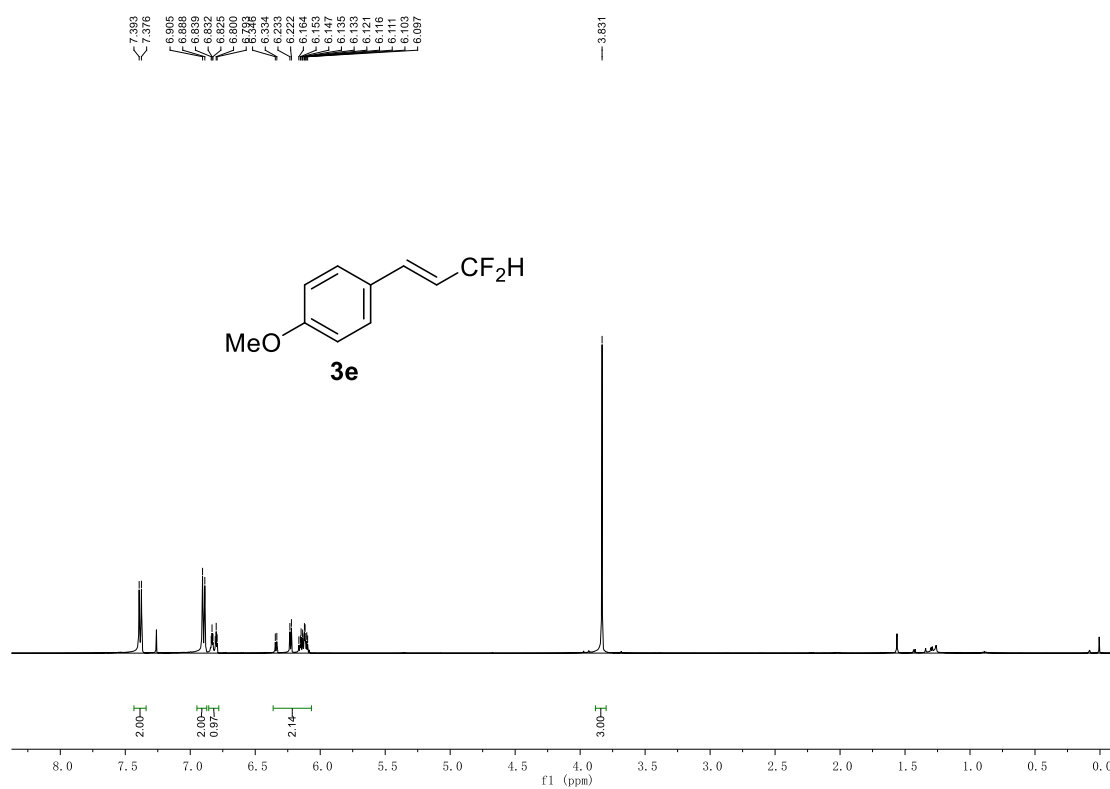

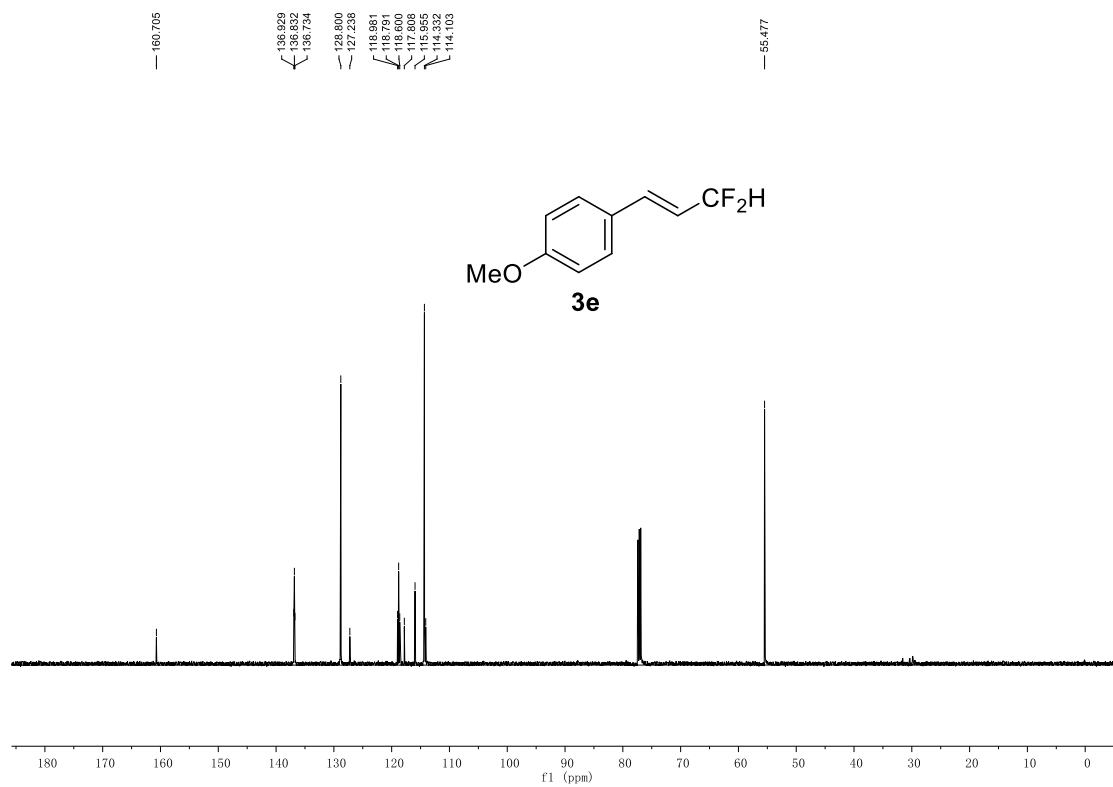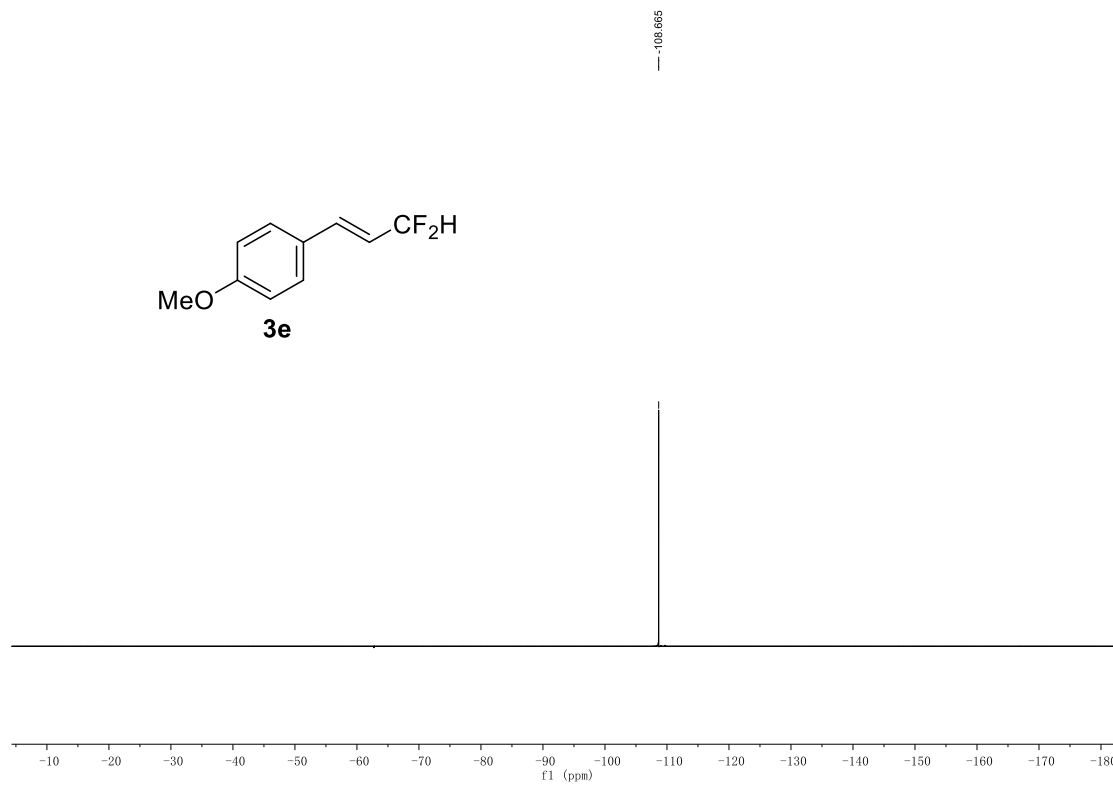

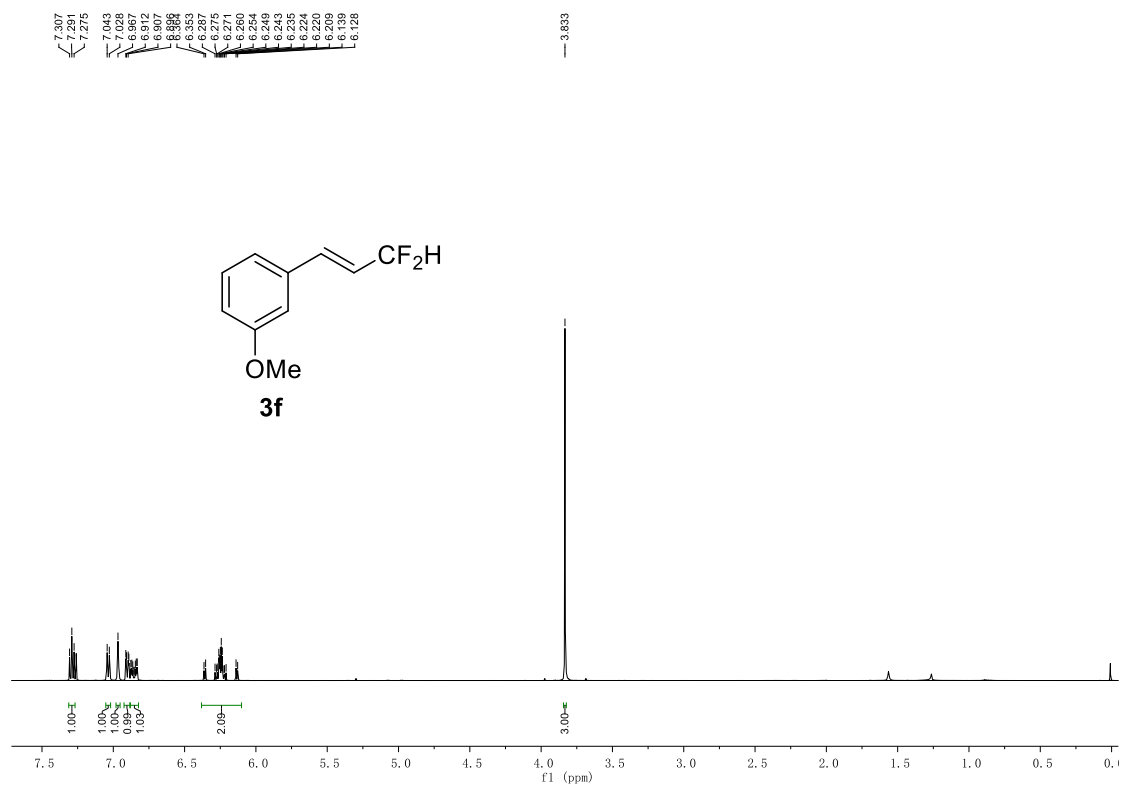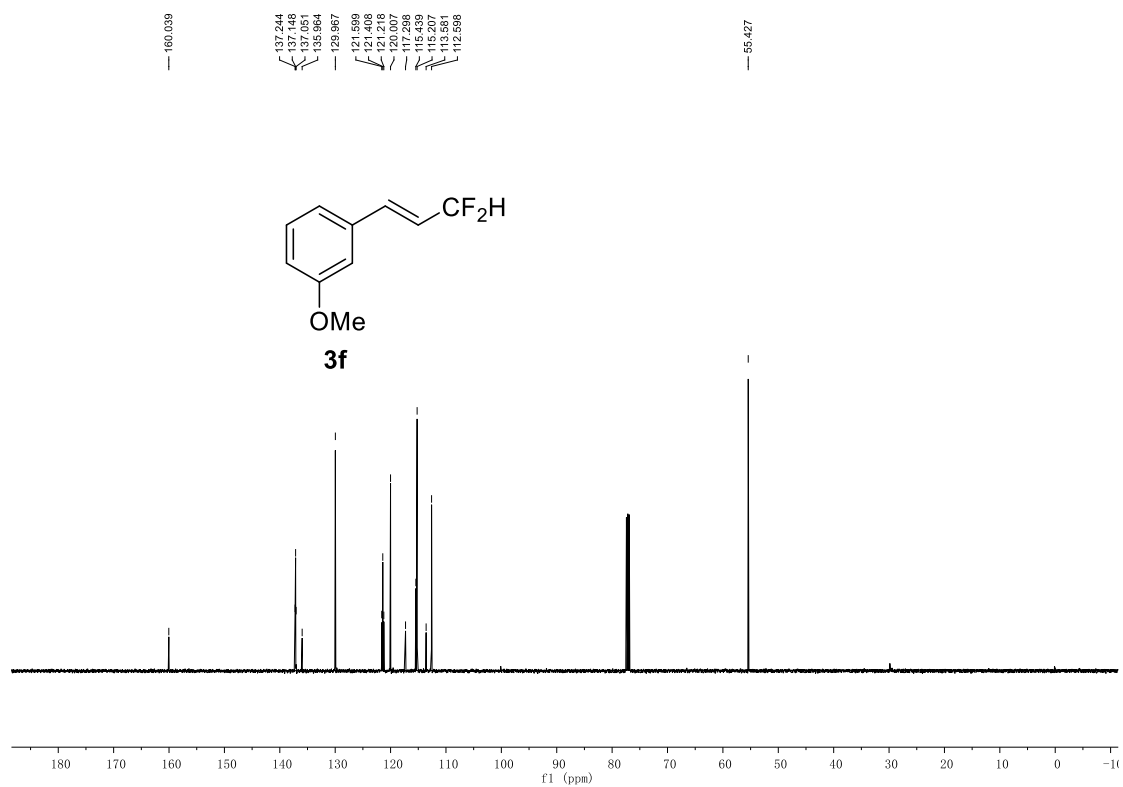

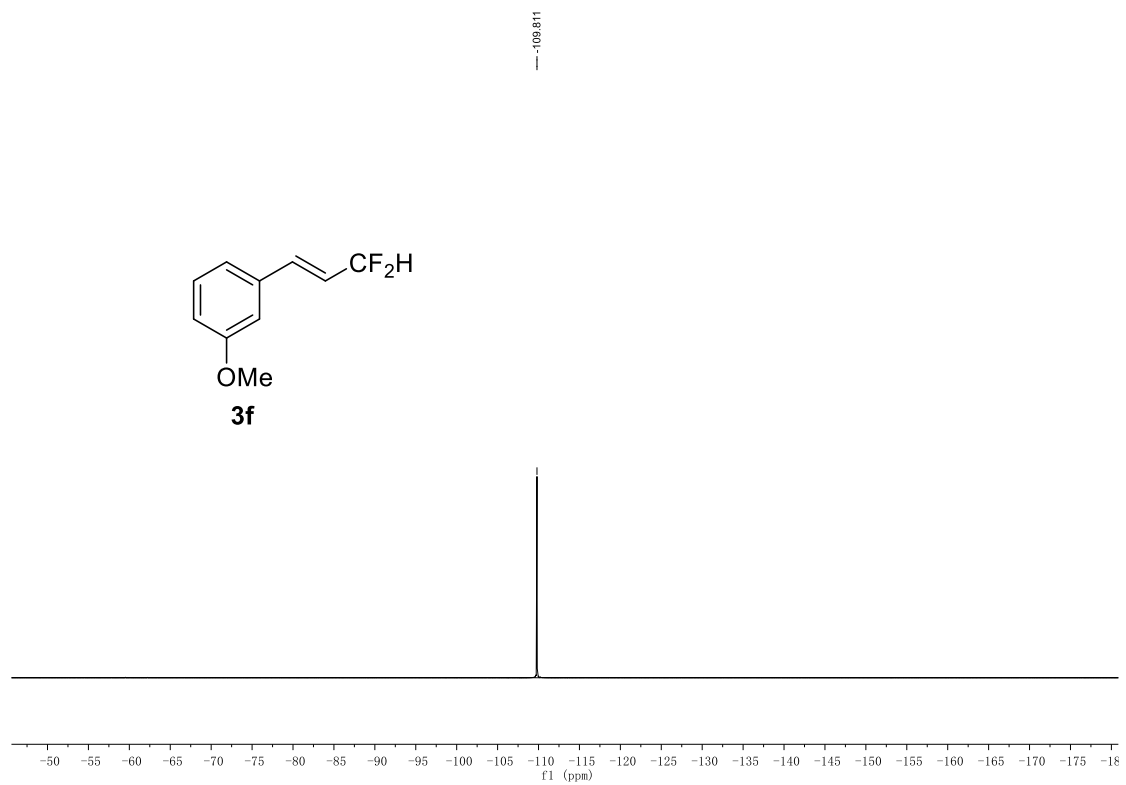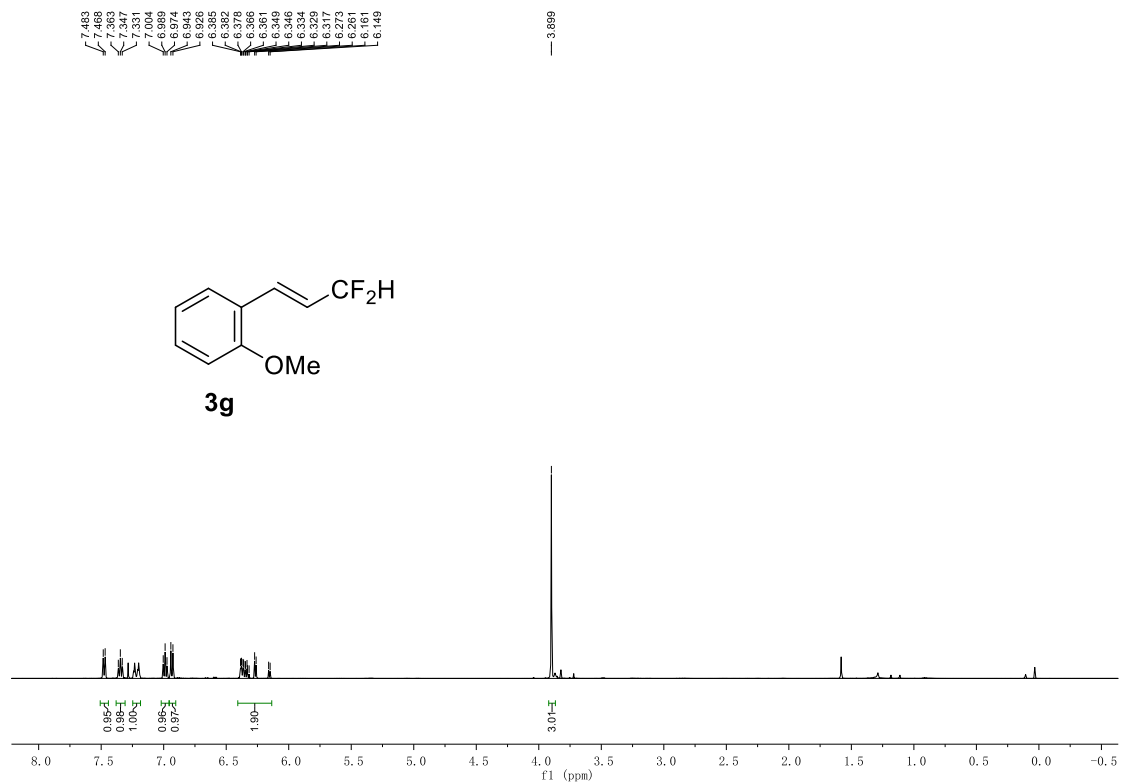

157.643

132.729  
129.252  
132.627  
130.675  
128.056  
123.487  
121.822  
121.630  
121.439  
120.882  
118.248  
114.396  
111.132

55.688

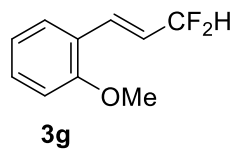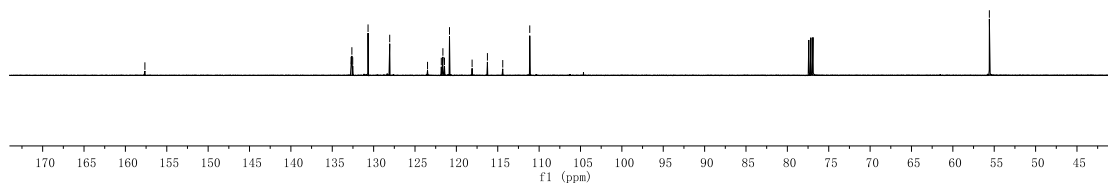

-108.705

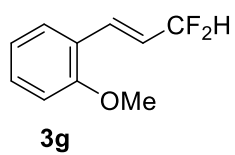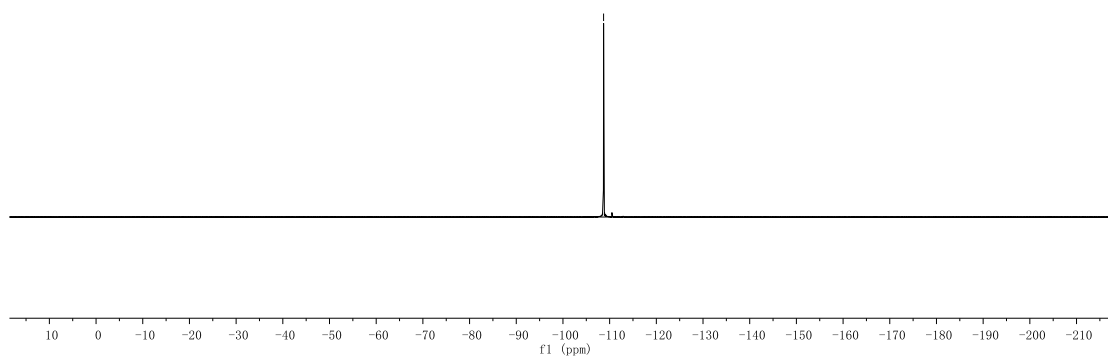

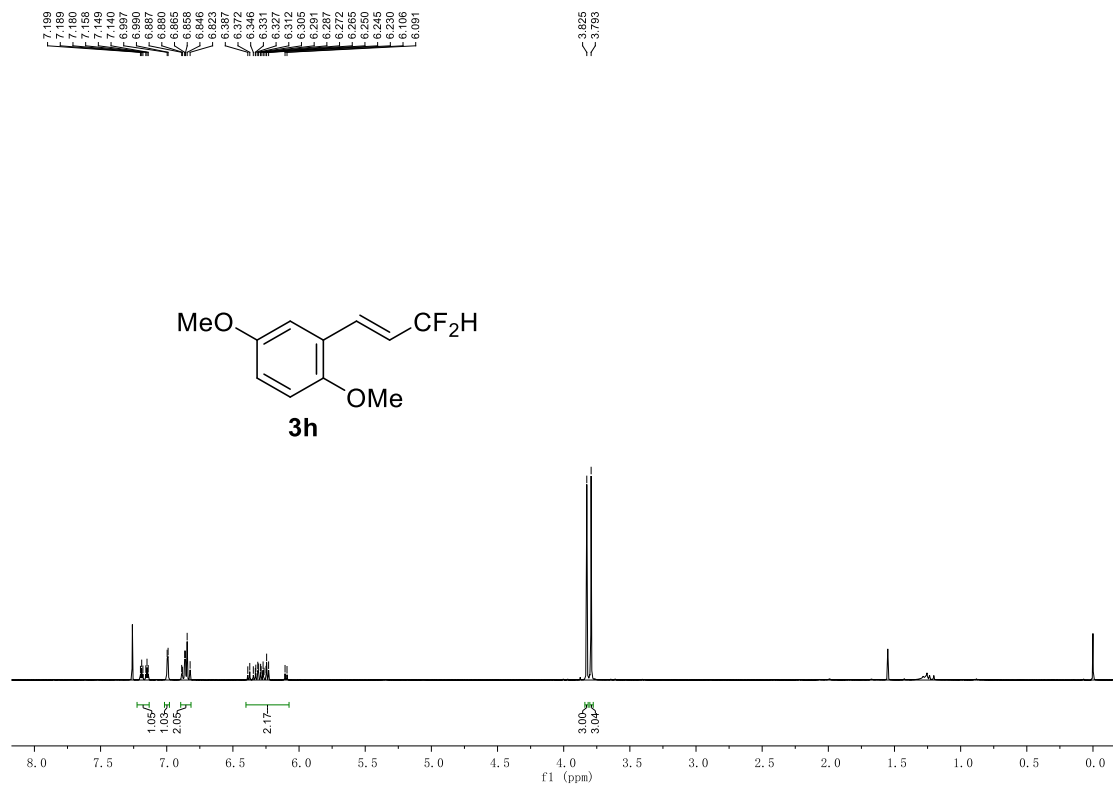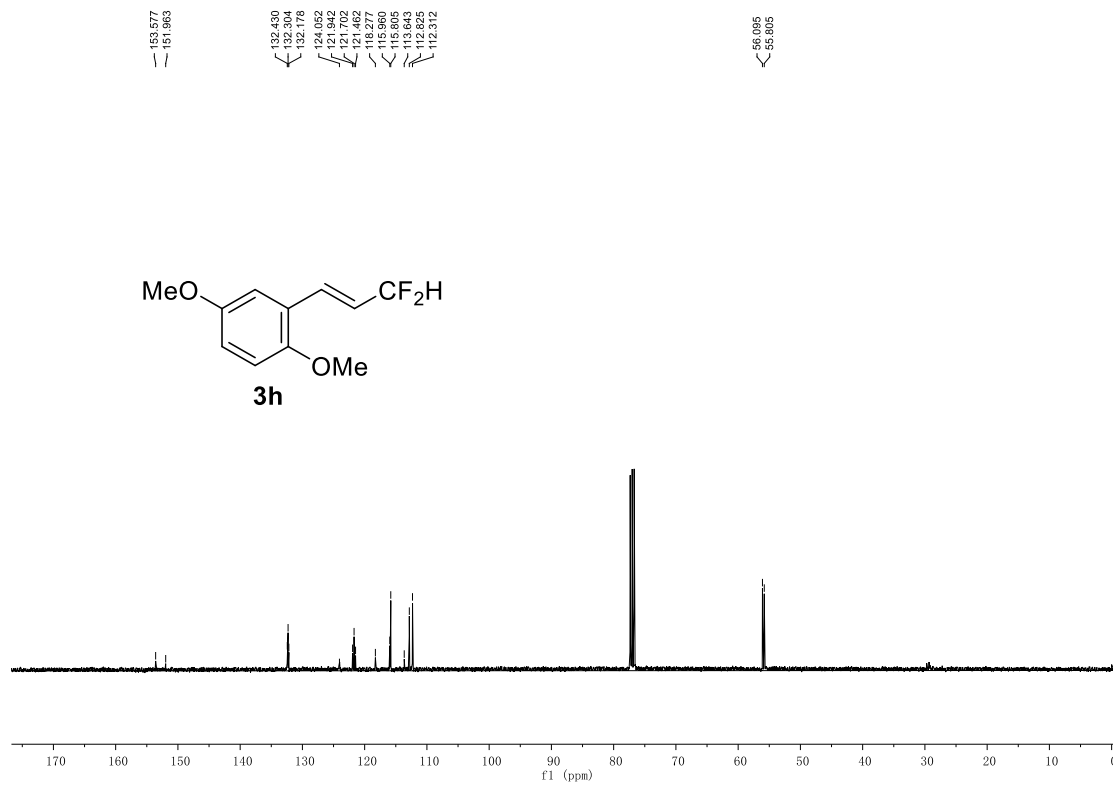



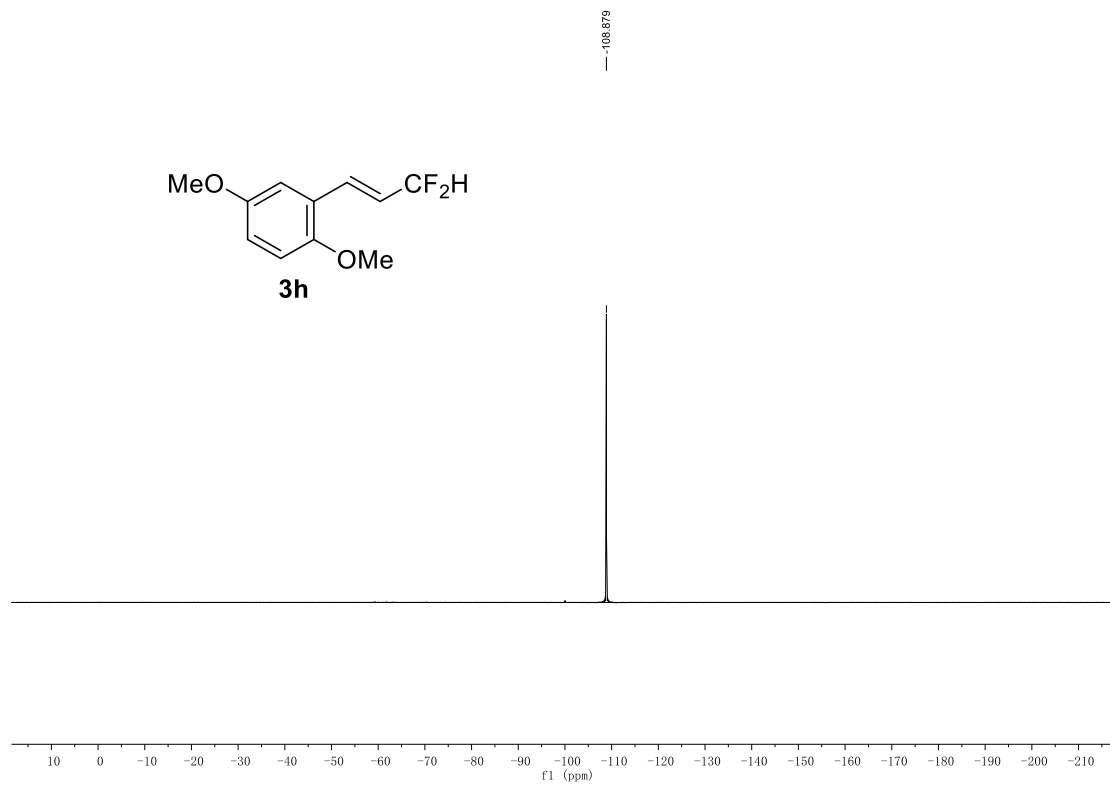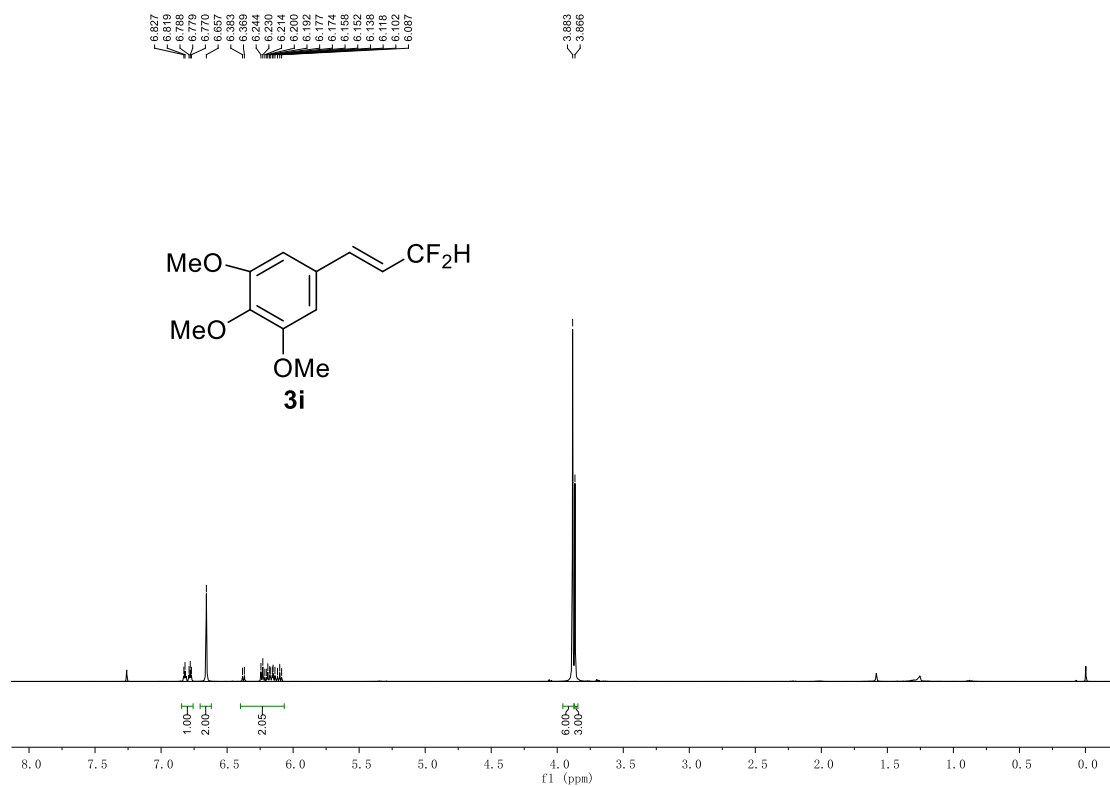

153.690  
137.317  
137.196  
137.075  
130.159  
120.766  
120.528  
120.290  
117.789  
115.486  
113.144  
104.555  
61.085  
56.293

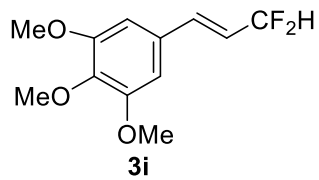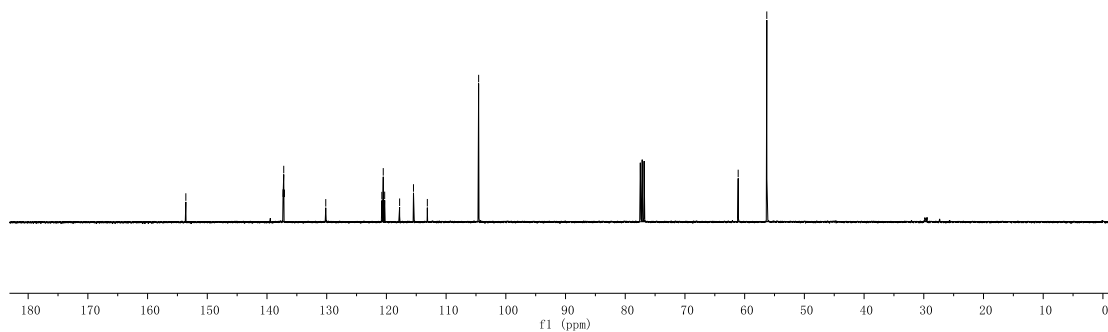

-109.426

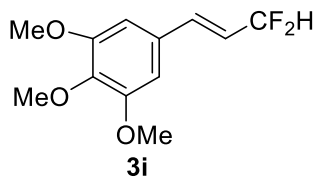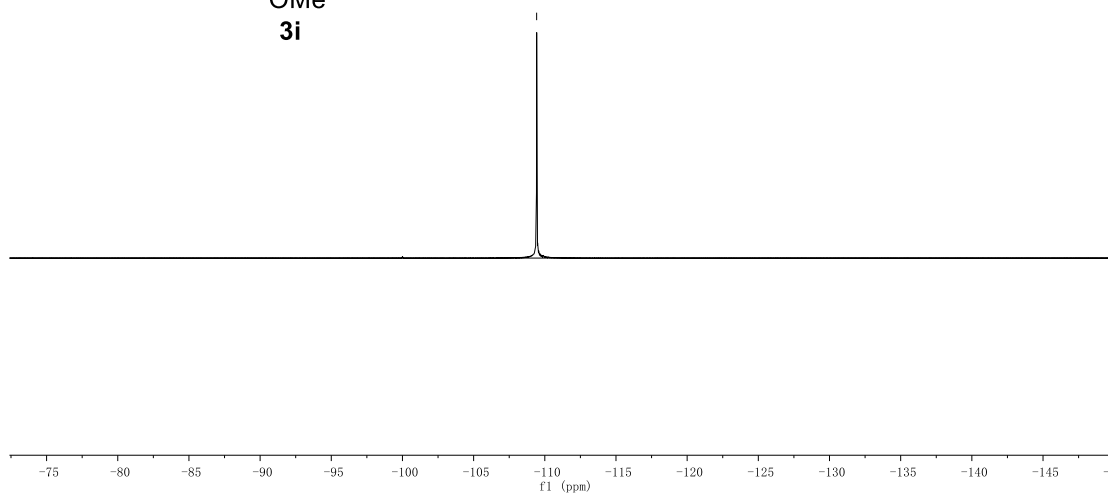

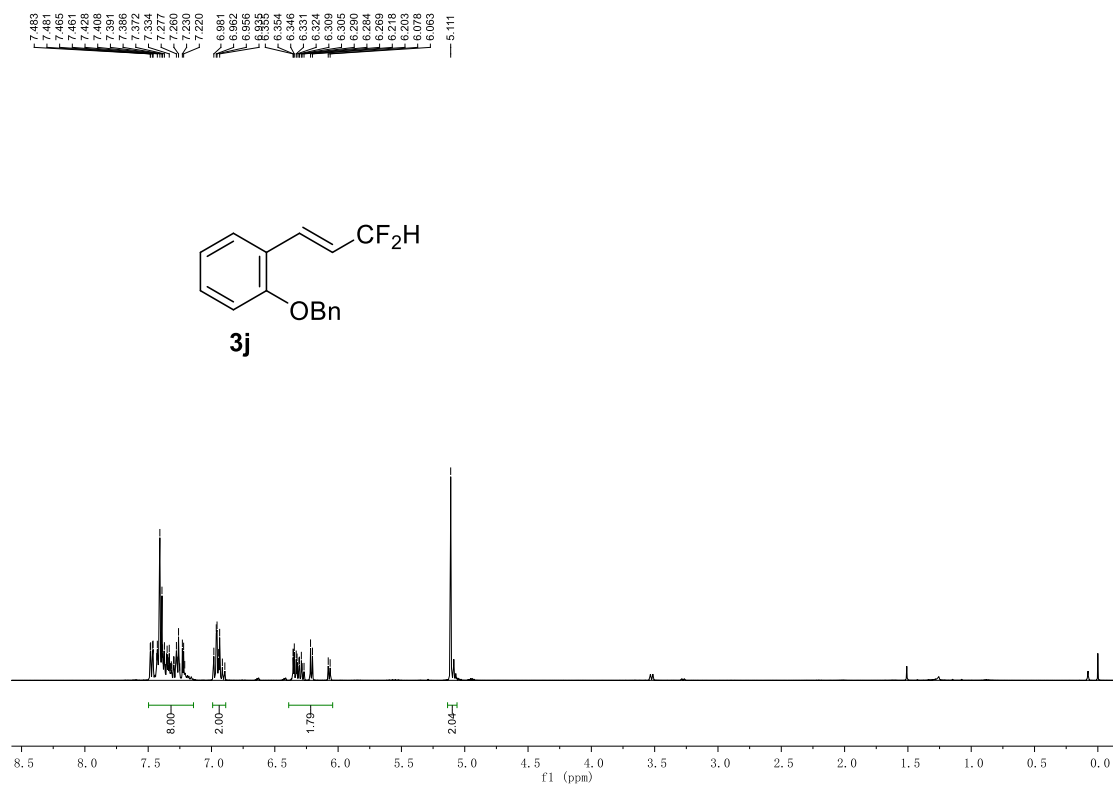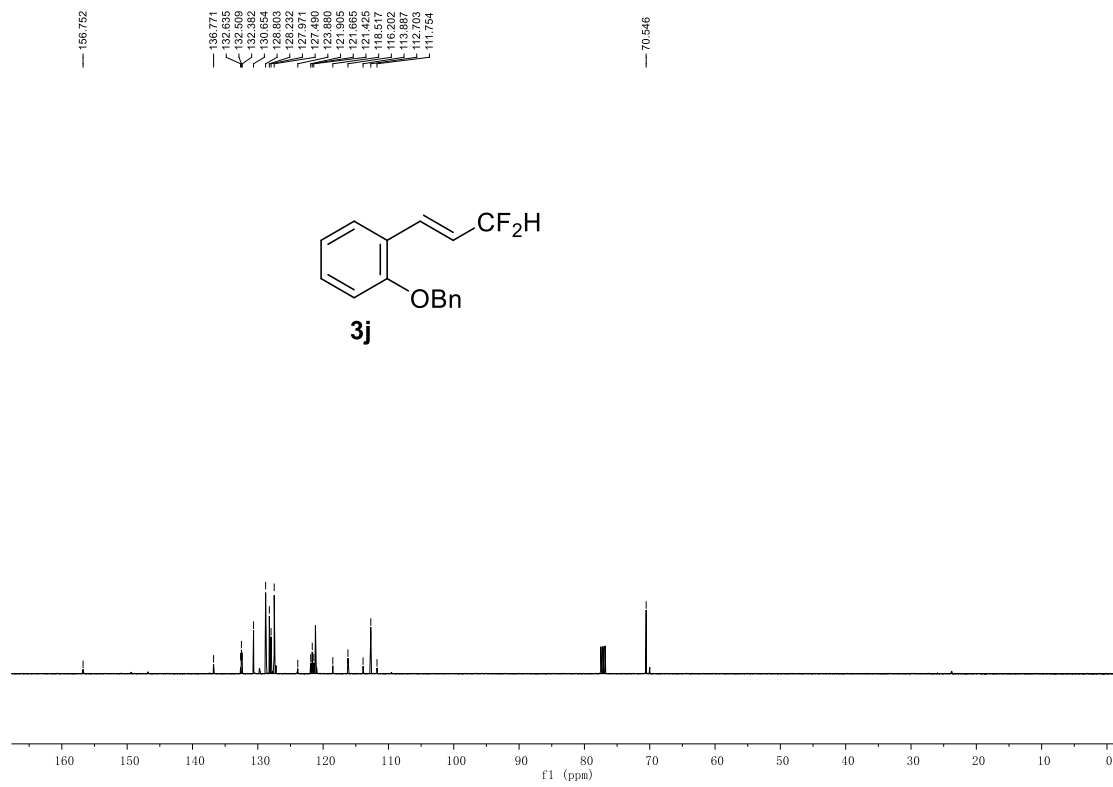

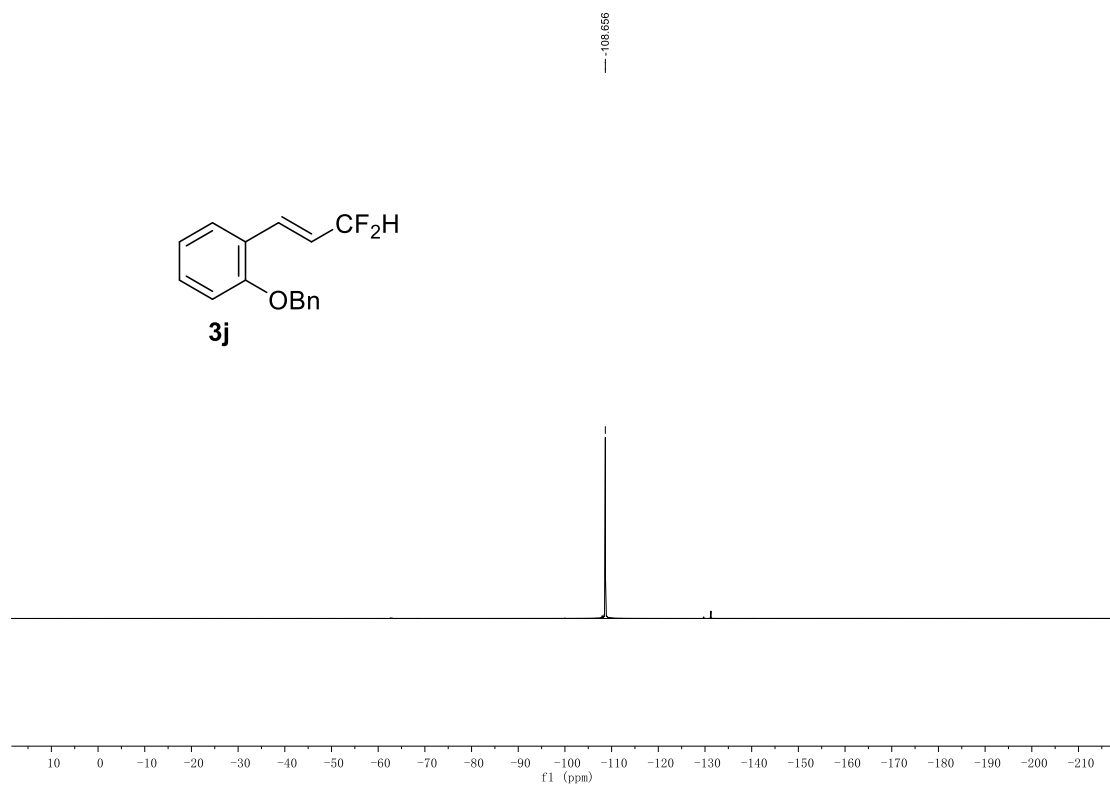

7.419  
7.388  
7.389  
7.367  
7.349  
7.280  
7.171  
7.152  
7.063  
7.050  
7.031  
7.029  
6.994  
6.984  
6.982  
6.977  
6.857  
6.856  
6.856  
6.374  
6.234  
6.218  
6.204  
6.196  
6.182  
6.177  
6.163  
6.156  
6.142  
6.128  
6.106  
6.092

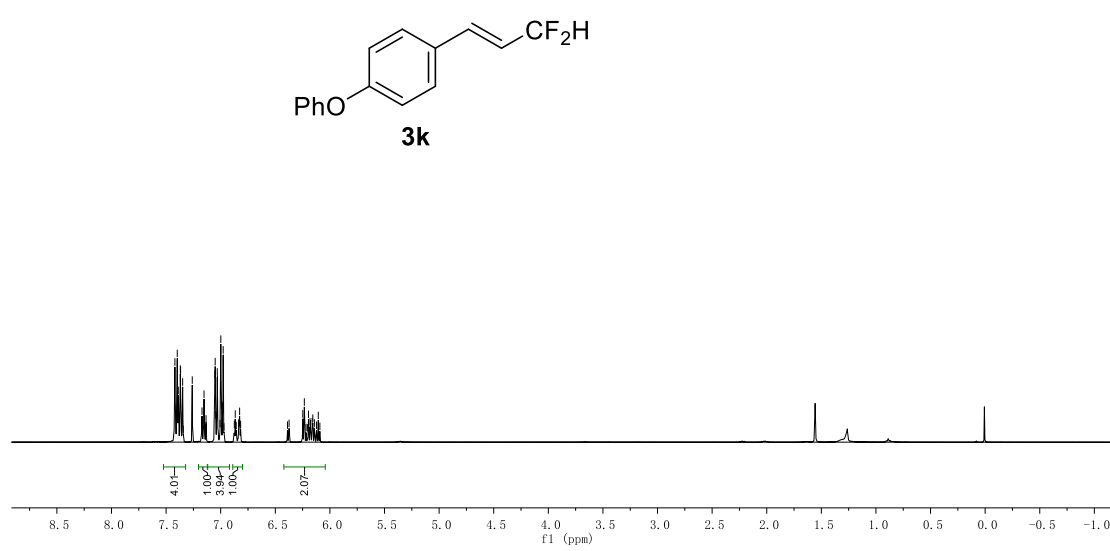

158.718  
 156.573  
 136.597  
 136.476  
 136.354  
 130.039  
 128.971  
 128.921  
 124.030  
 120.209  
 119.971  
 118.972  
 118.738  
 117.882  
 115.662  
 113.342

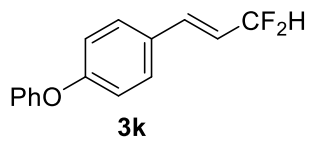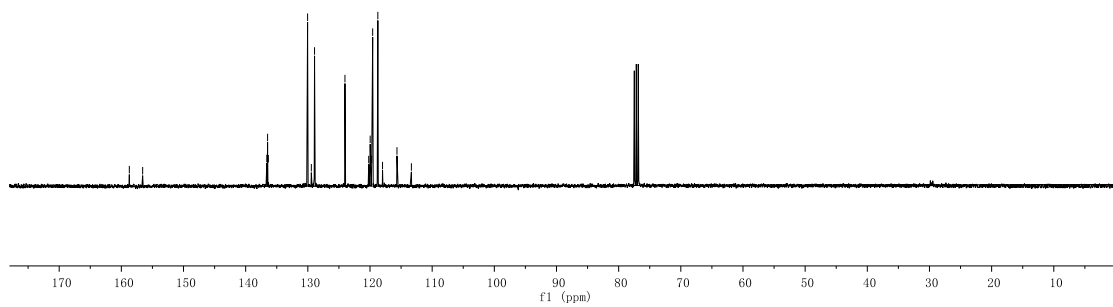

-109.199

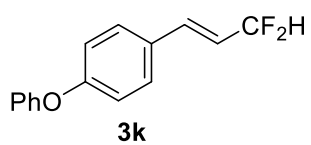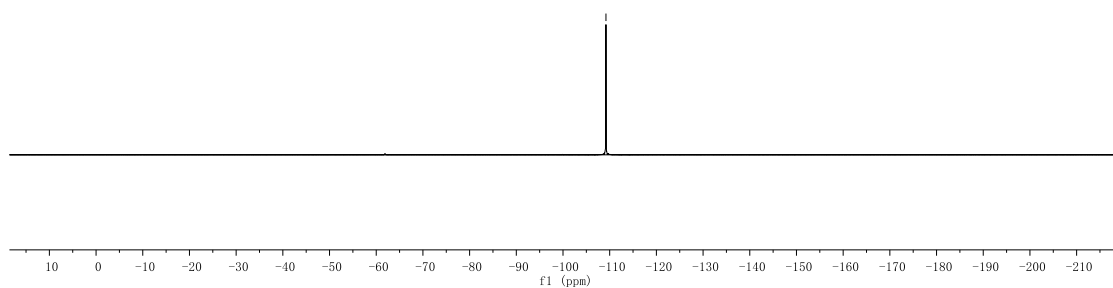

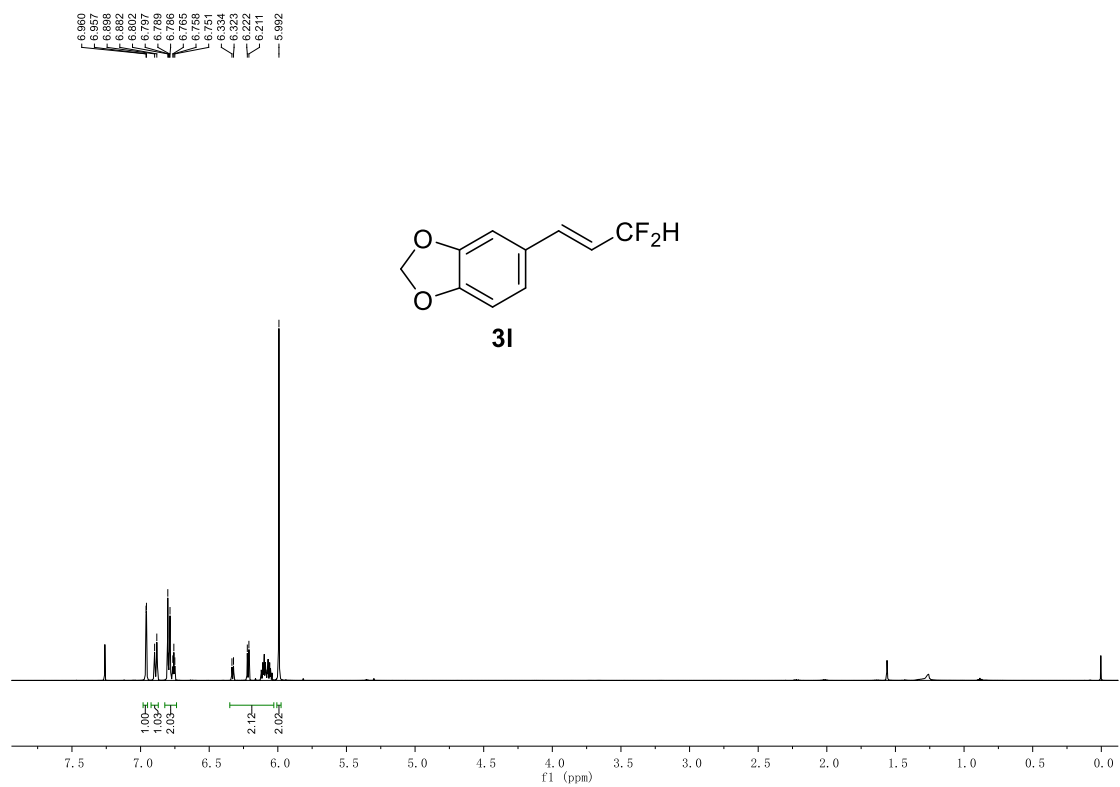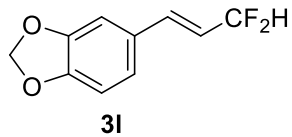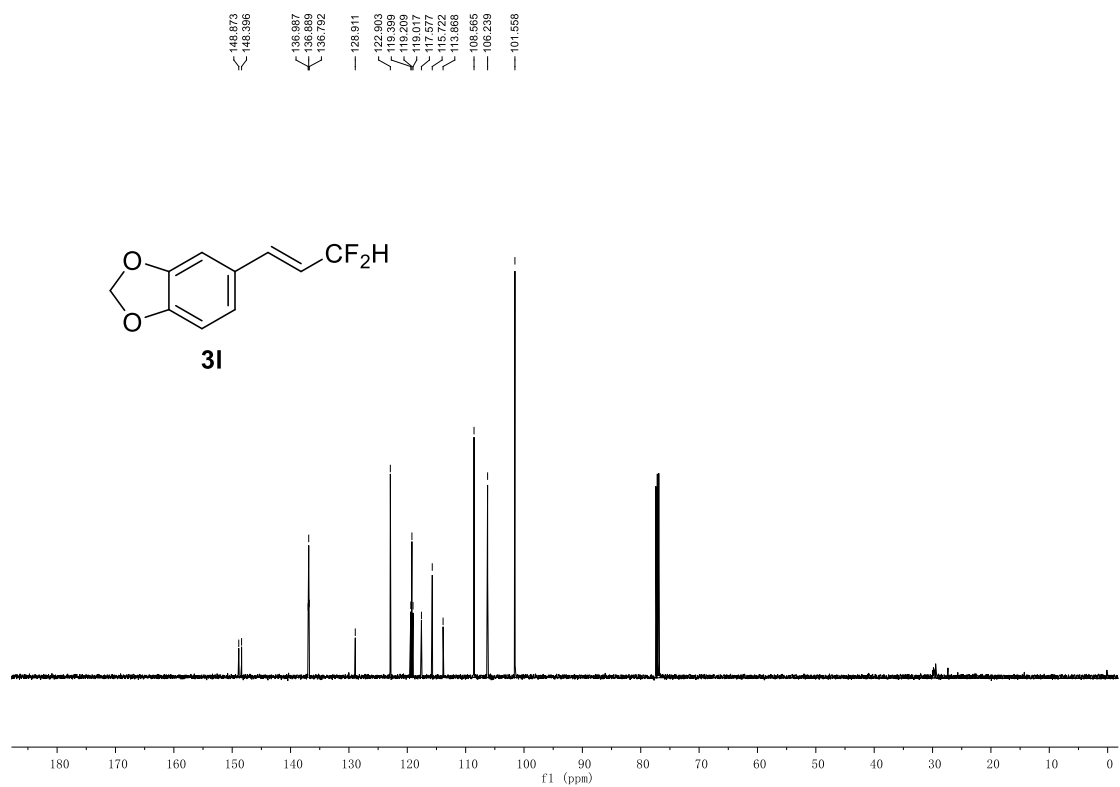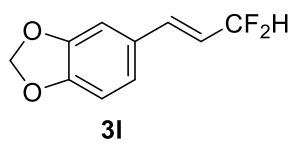

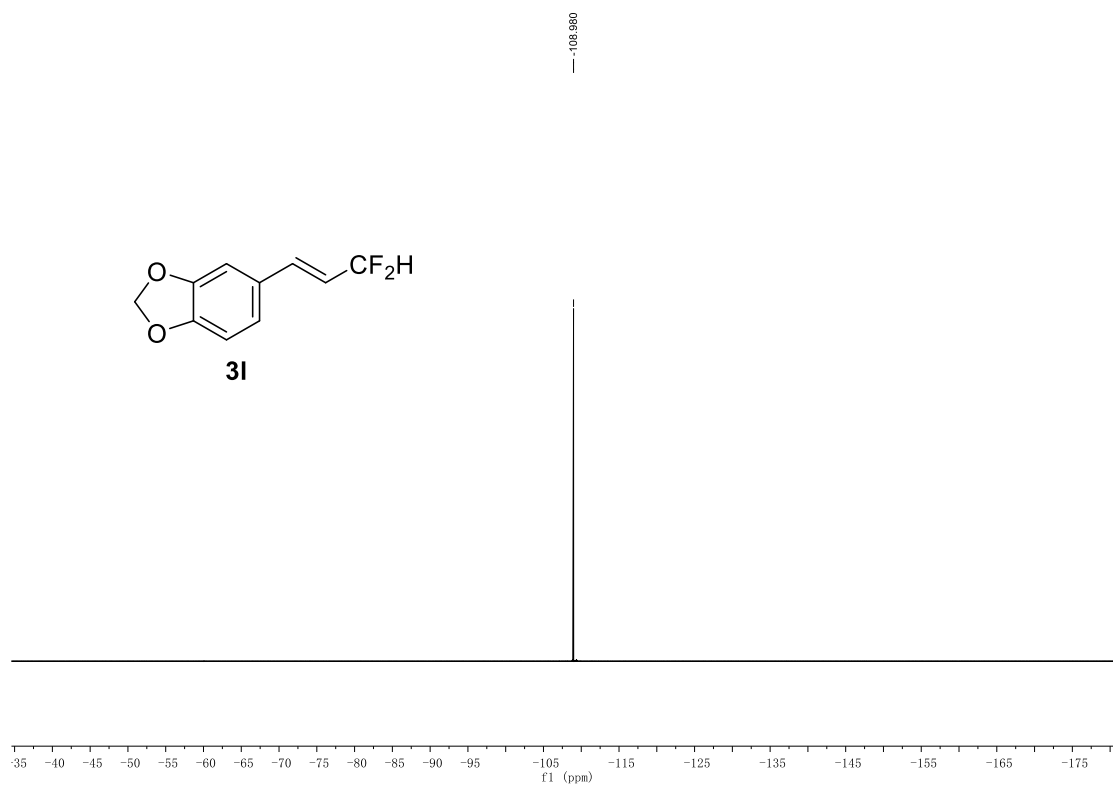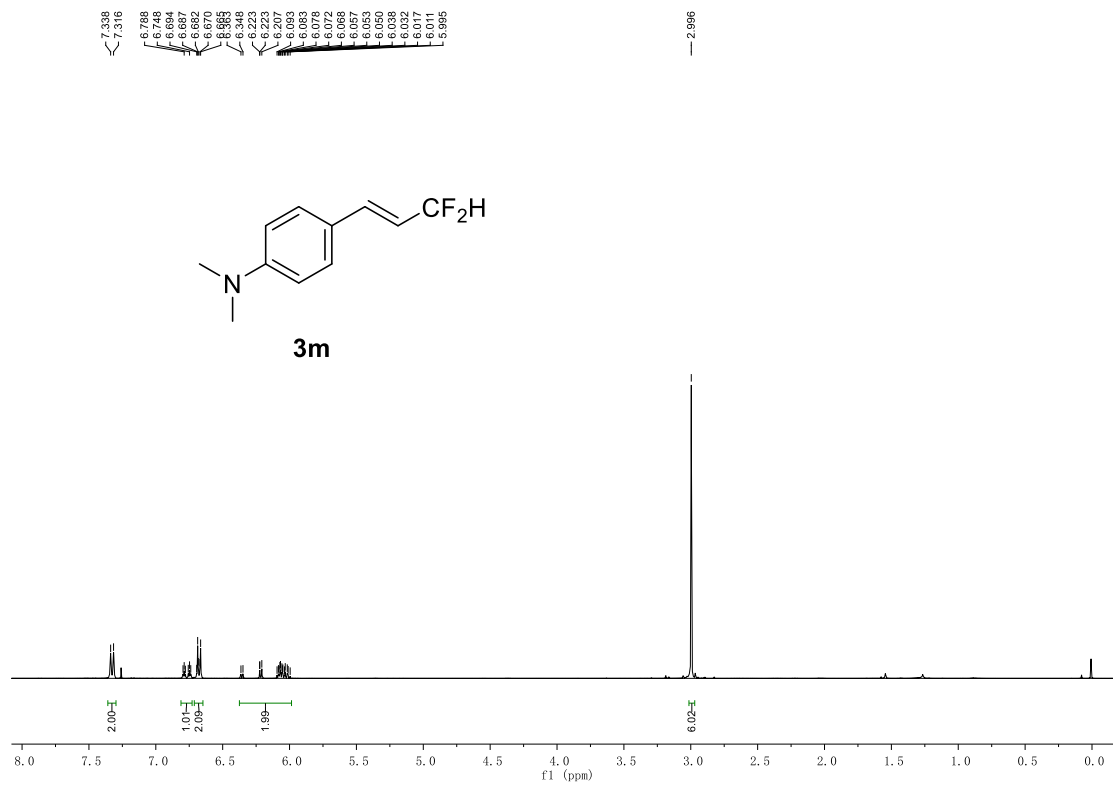

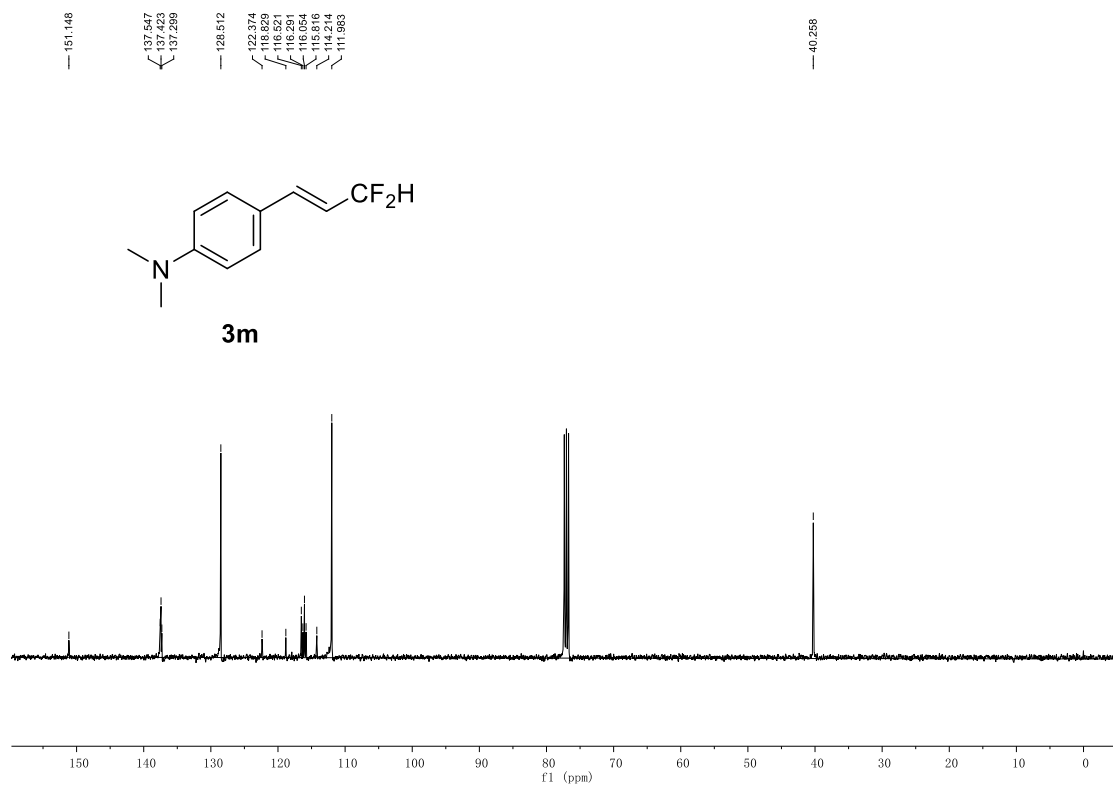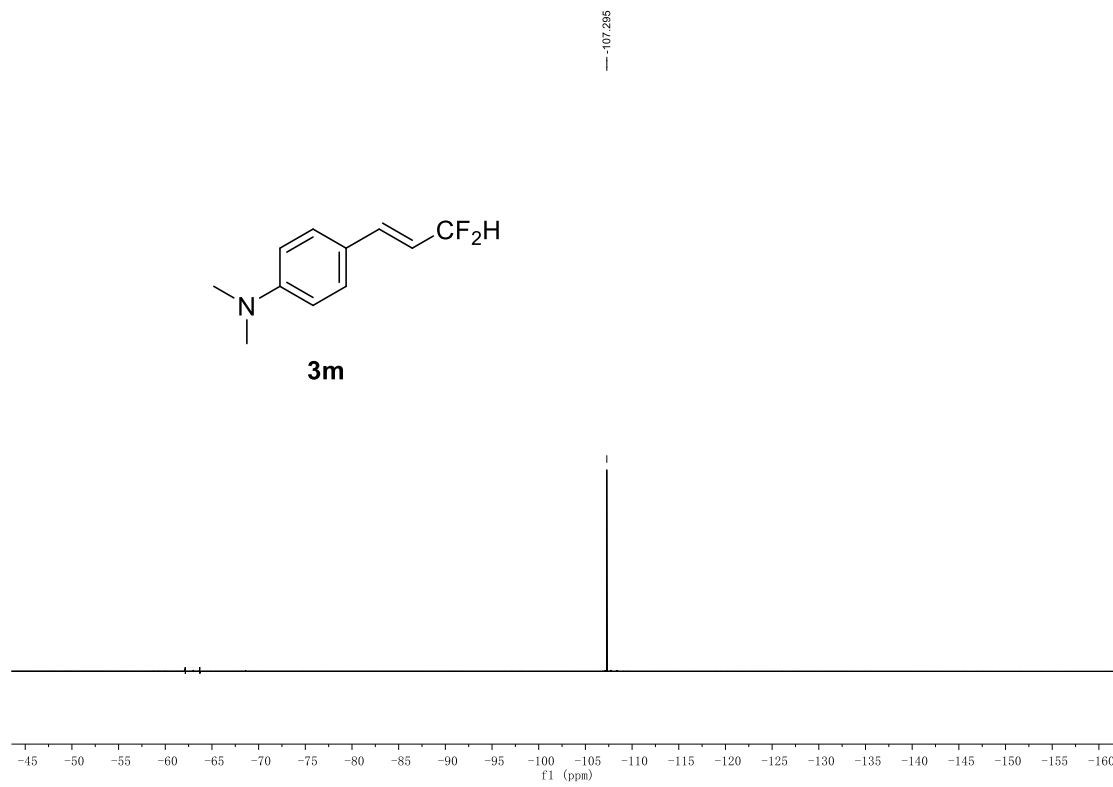



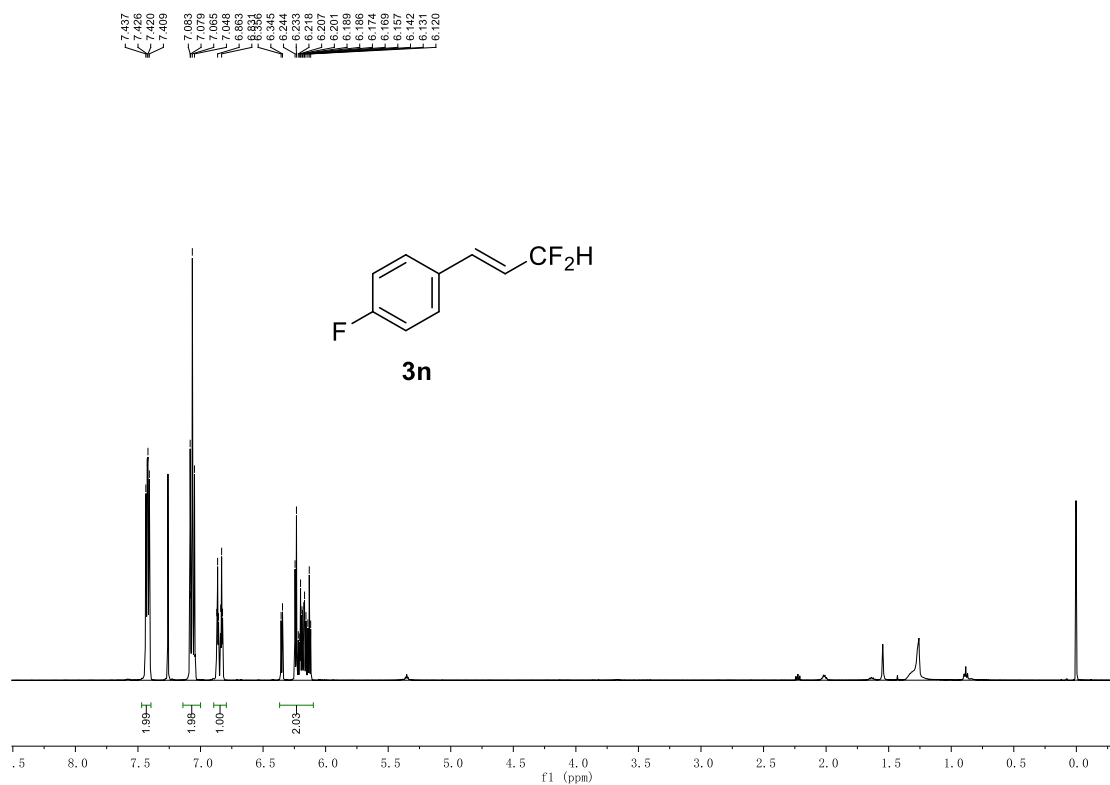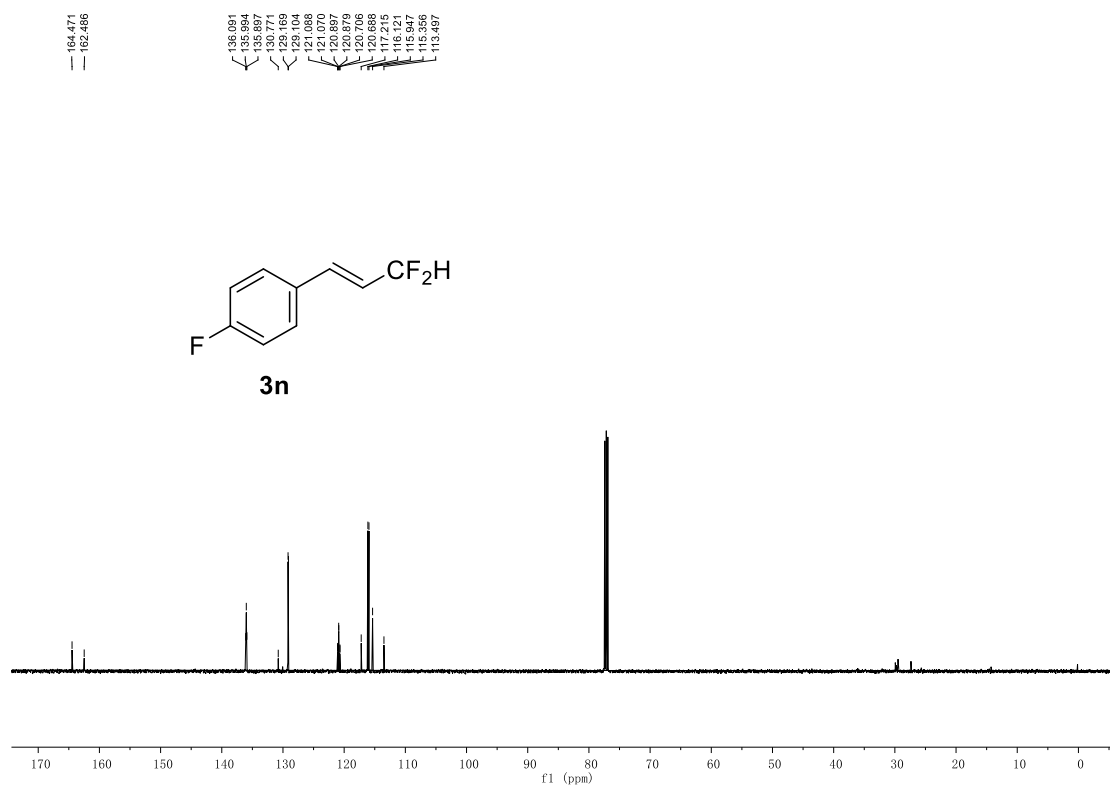

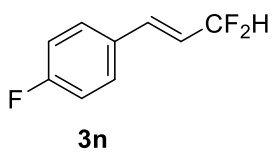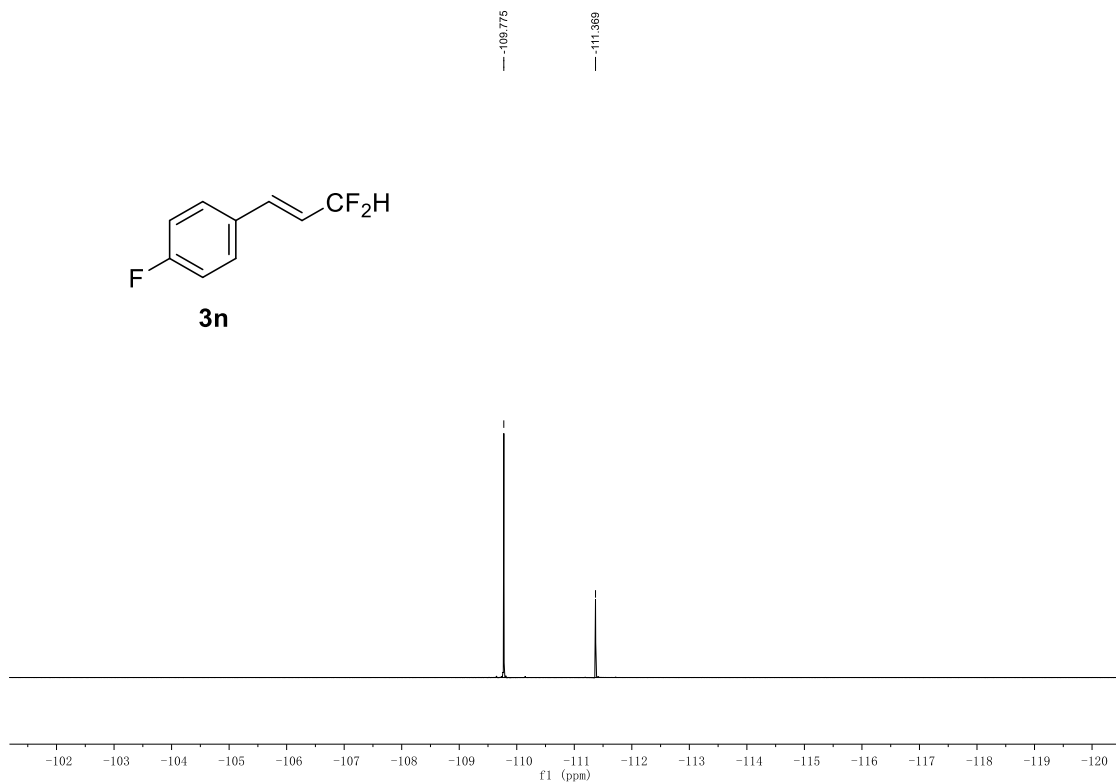

7.210  
 7.204  
 7.179  
 7.174  
 7.151  
 7.129  
 6.959  
 6.937  
 6.915  
 6.895  
 6.799  
 6.792  
 6.784  
 6.769  
 6.752  
 6.743  
 6.589  
 6.595  
 6.572  
 6.215  
 6.159  
 6.145  
 6.137  
 6.127  
 6.119  
 6.104  
 6.097  
 6.088  
 6.079  
 6.073

3.909

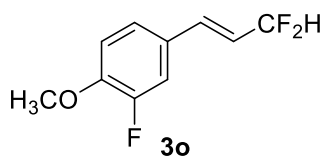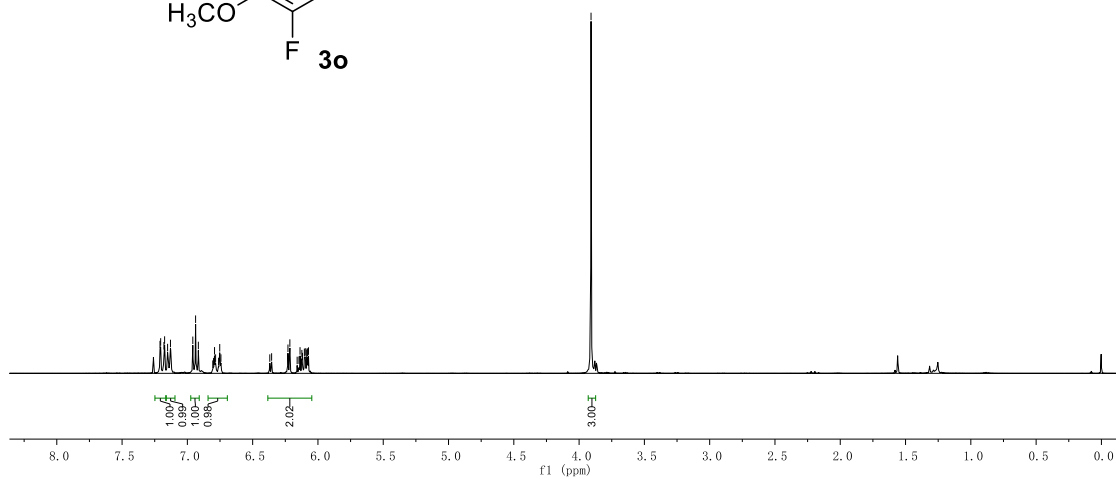

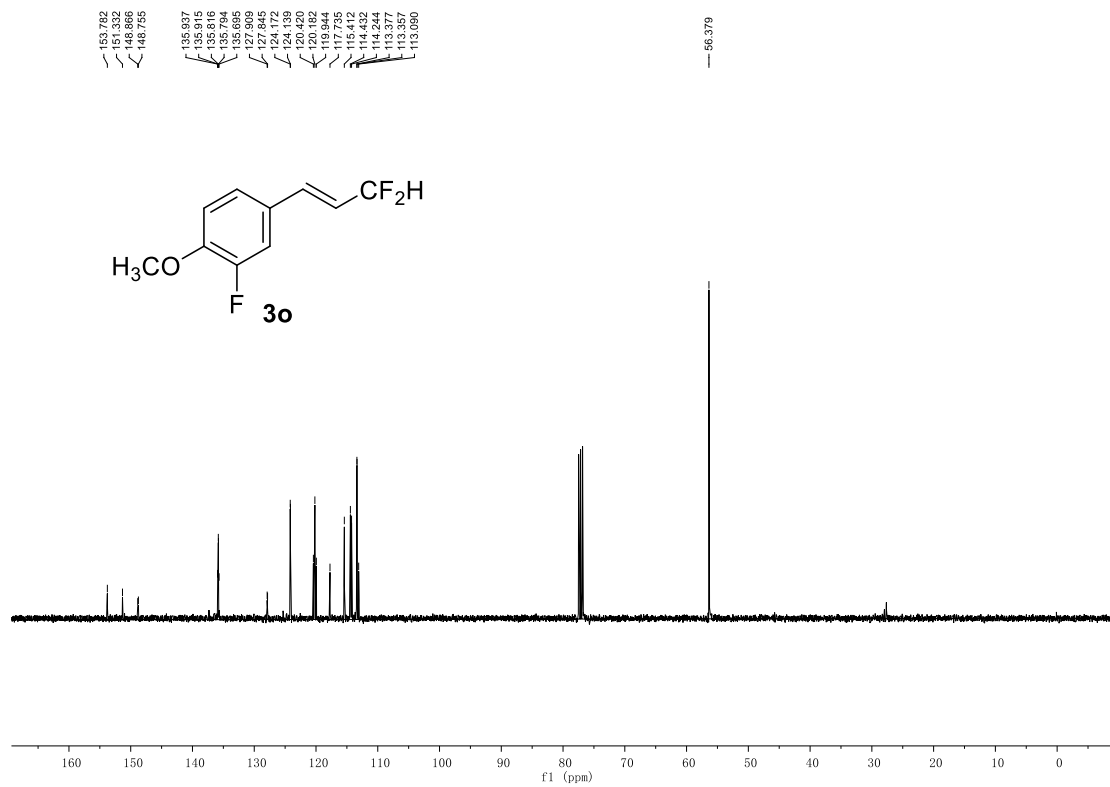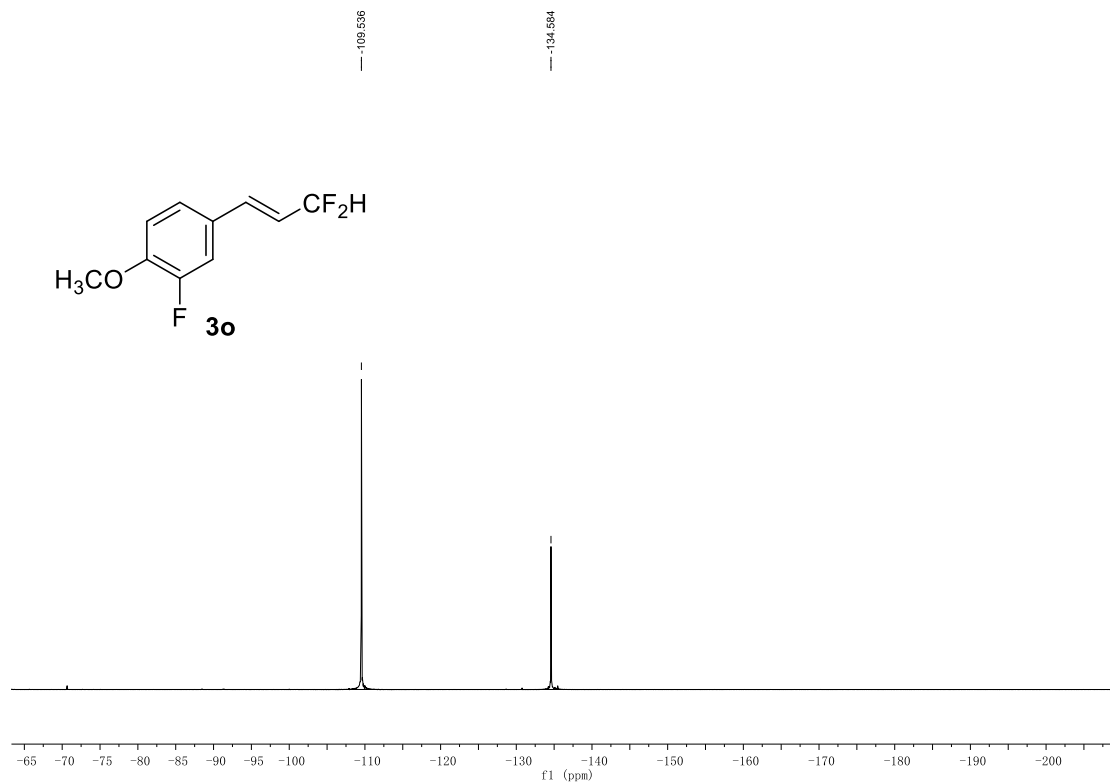

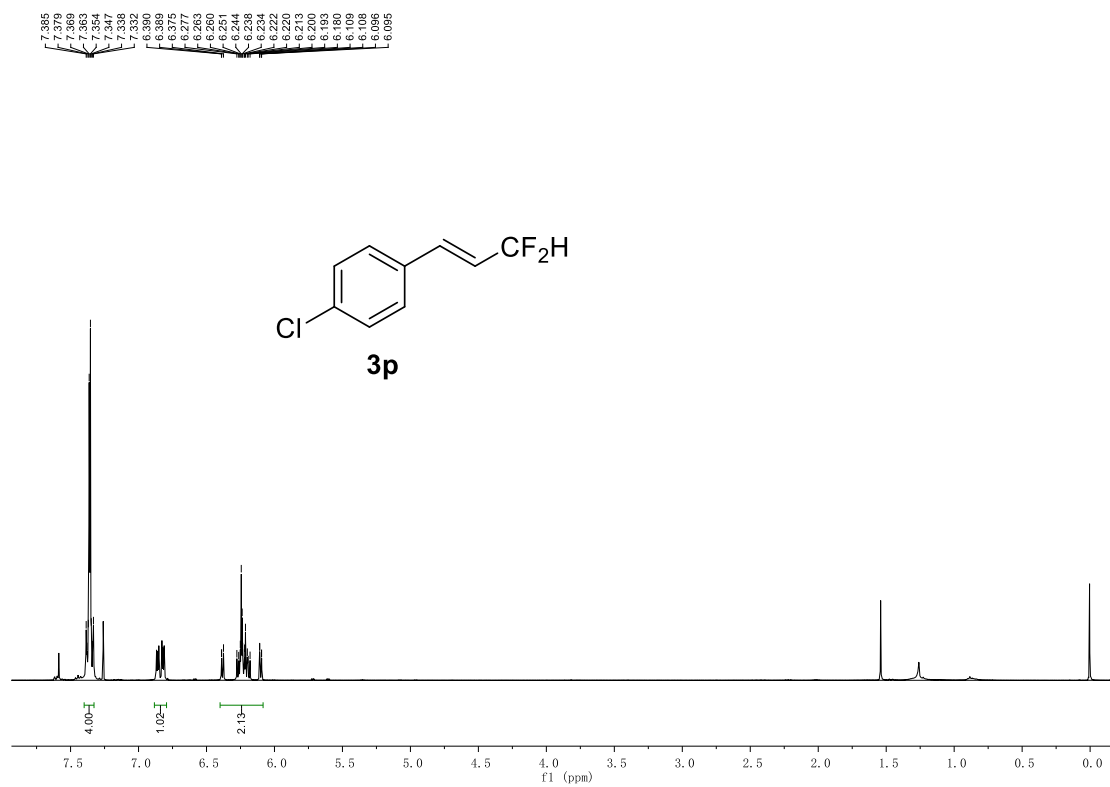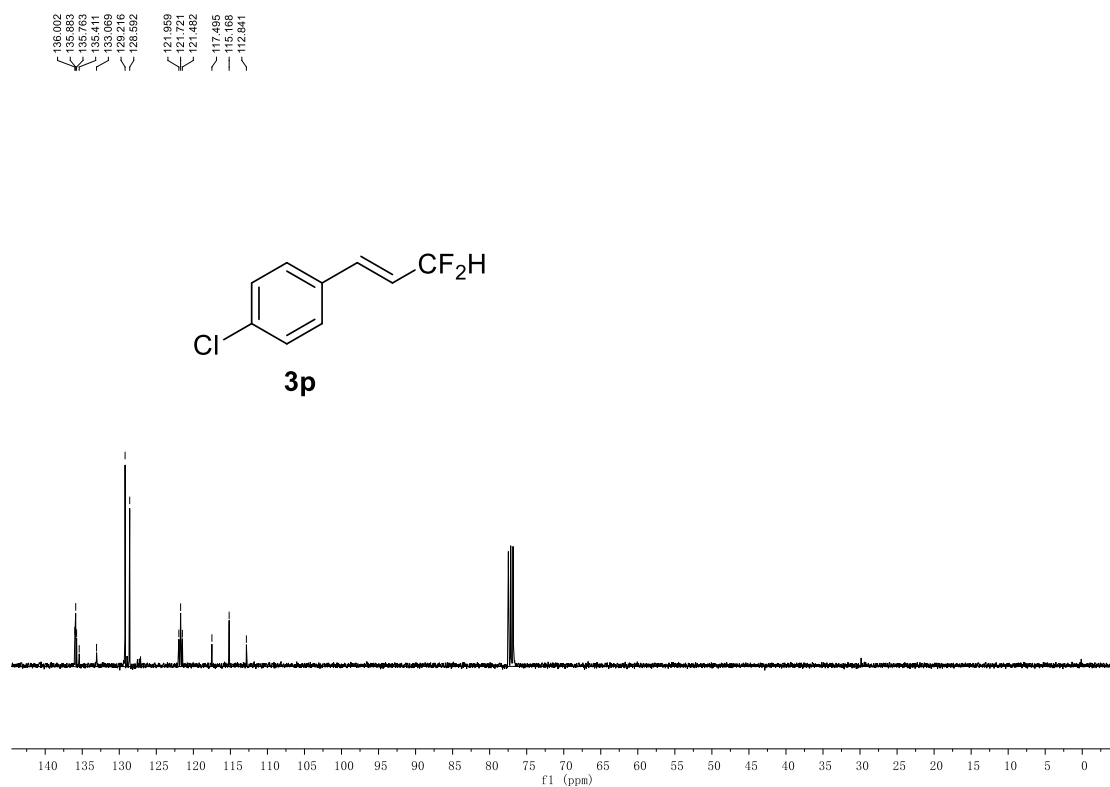

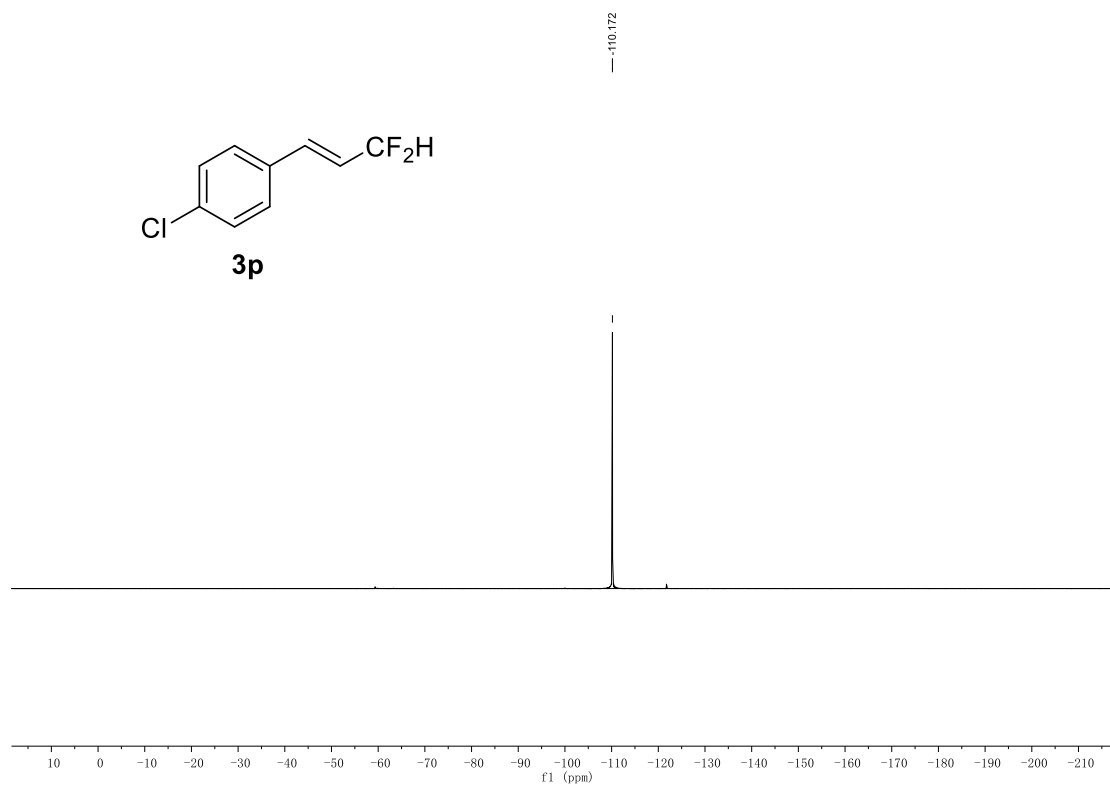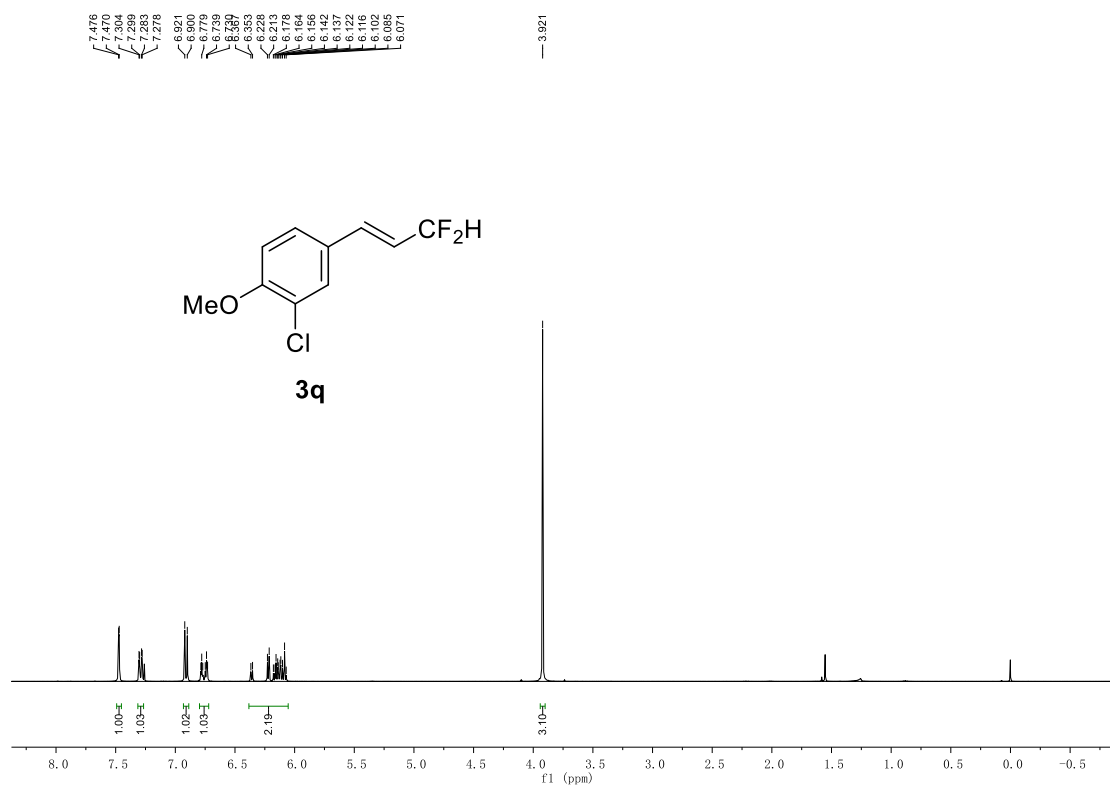

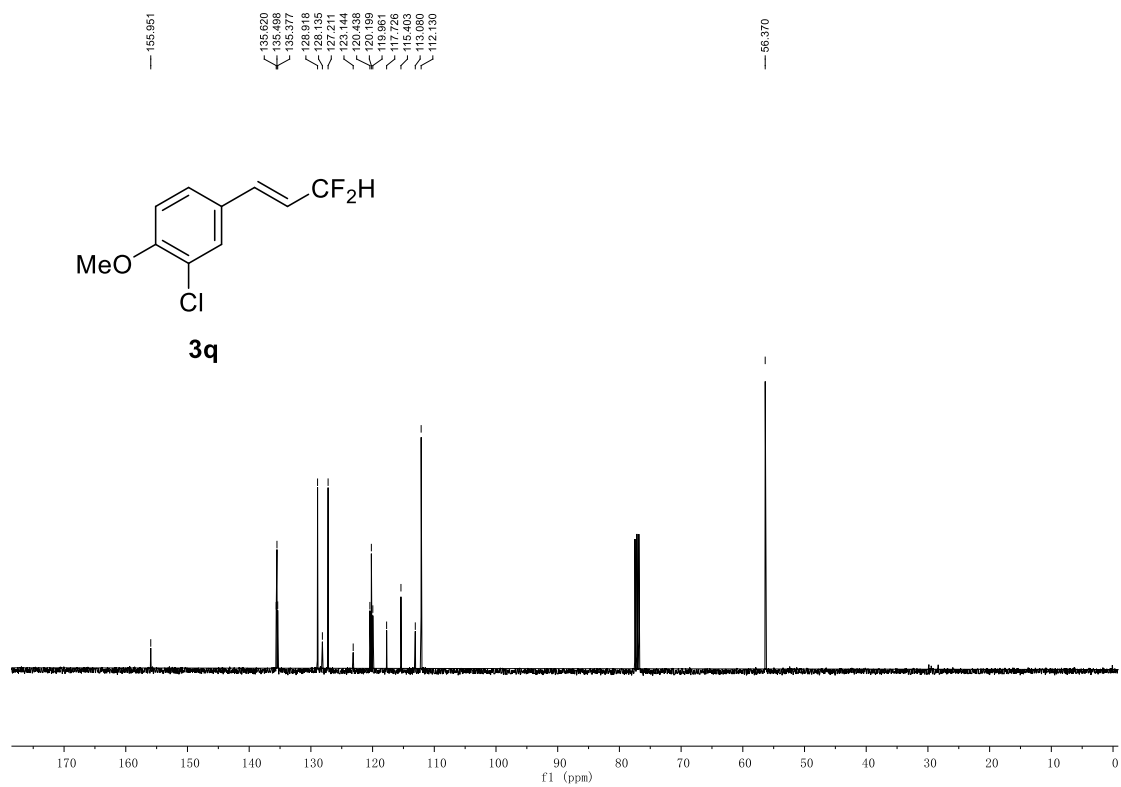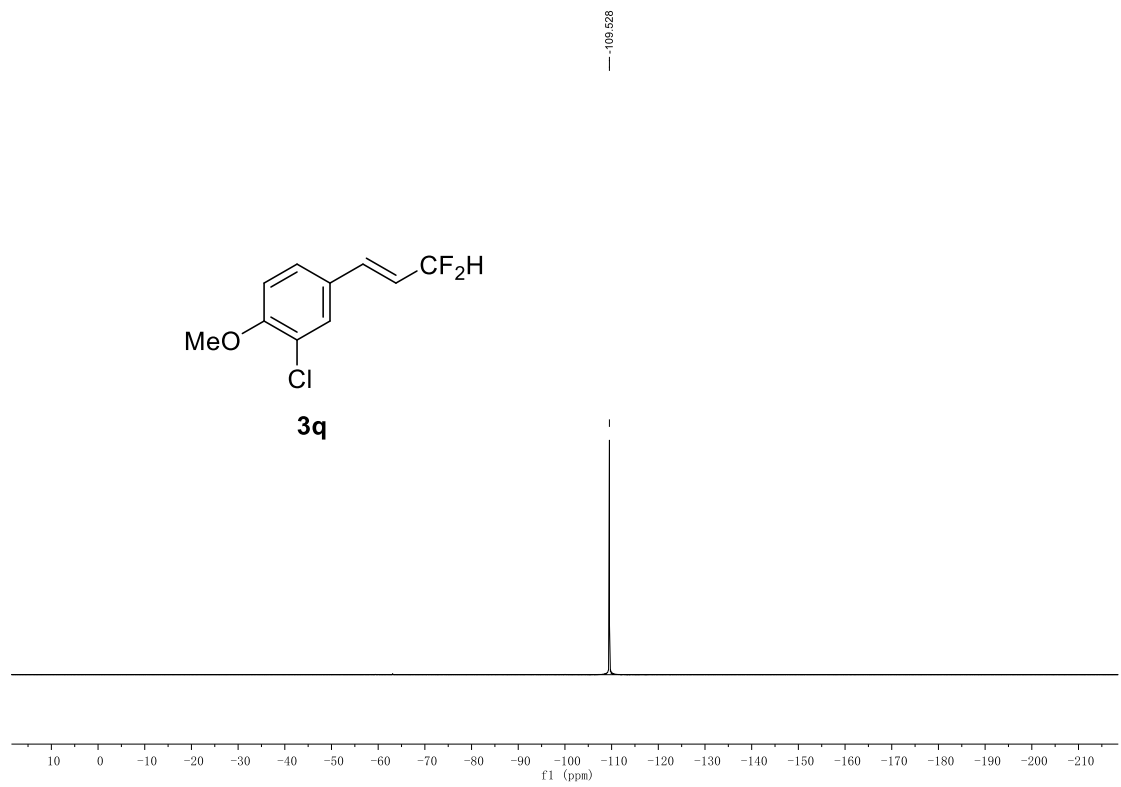

7.489  
7.401  
7.385  
7.224  
7.207  
6.764  
6.757  
6.746  
6.726  
6.728  
6.728  
6.297  
6.230  
6.220  
6.214  
6.204  
6.197  
6.193  
6.187  
6.179  
6.163  
6.153  
6.084  
6.073

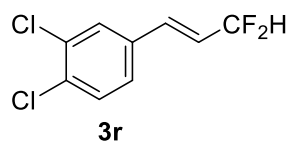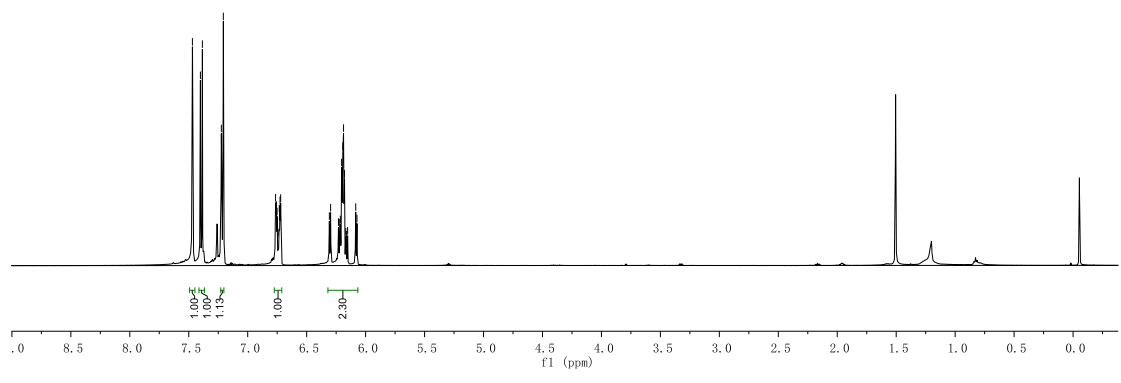

134.729  
134.634  
134.634  
130.894  
128.493  
126.430  
123.167  
122.576  
122.765  
116.571  
114.705  
112.838  
100.127

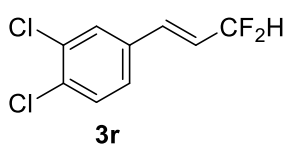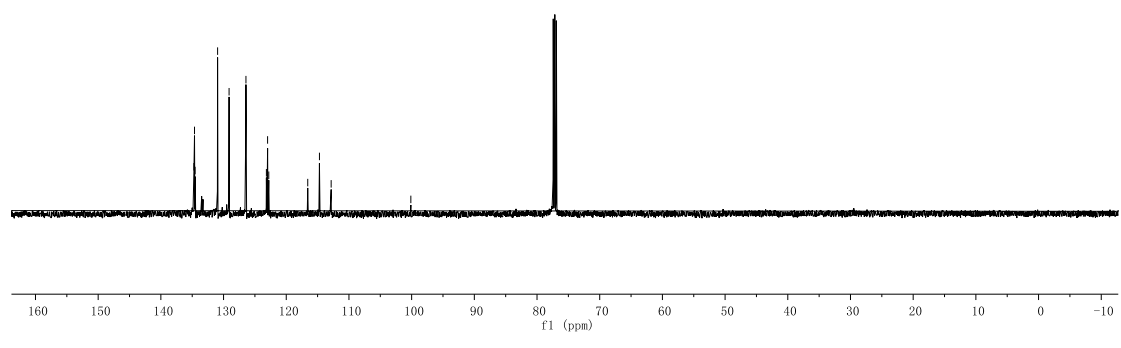

-110.875

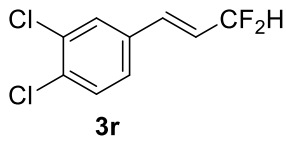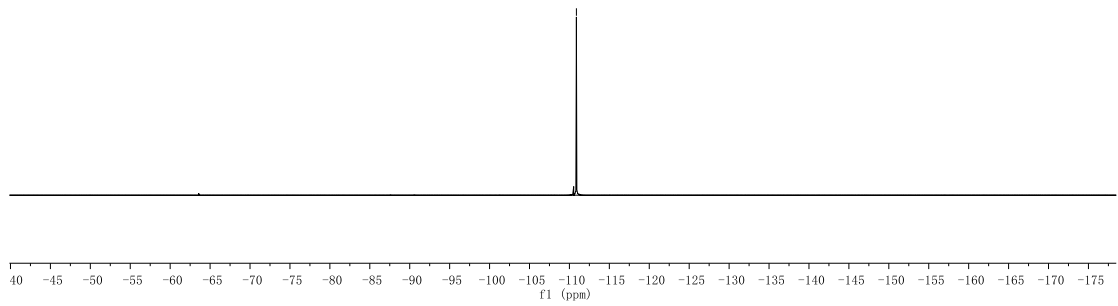

7.513  
7.468  
7.513  
7.285  
7.289  
6.846  
6.840  
6.840  
6.840  
6.840  
6.846  
6.282  
6.271  
6.266  
6.266  
6.266  
6.242  
6.237  
6.231  
6.205  
6.132  
6.121

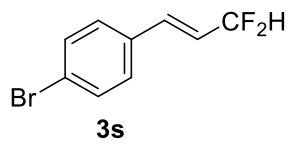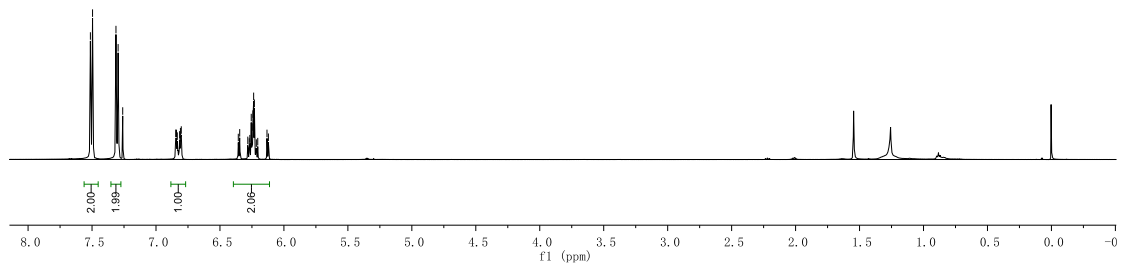



136.034  
135.938  
135.842  
133.502  
132.174  
126.846  
123.645  
122.718  
121.821  
121.837  
116.996  
113.272

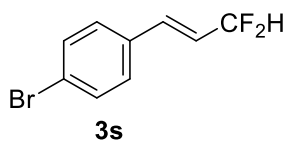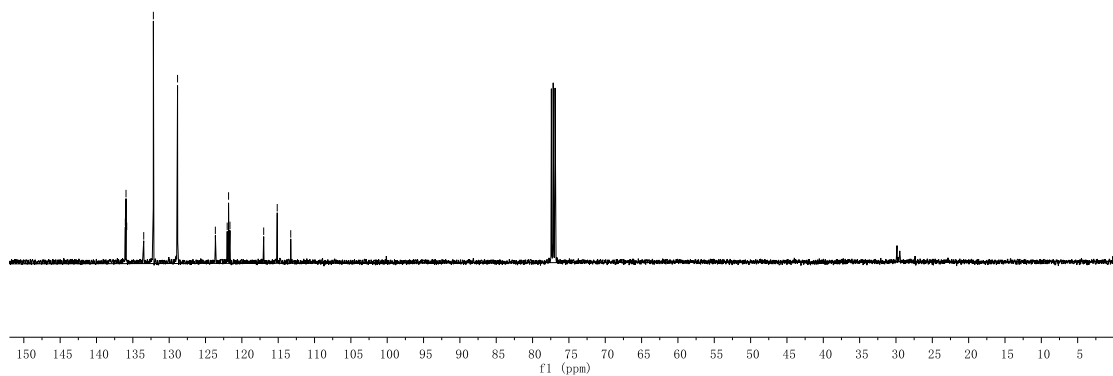

110.284

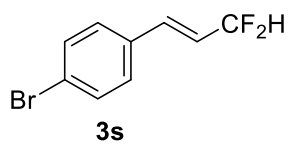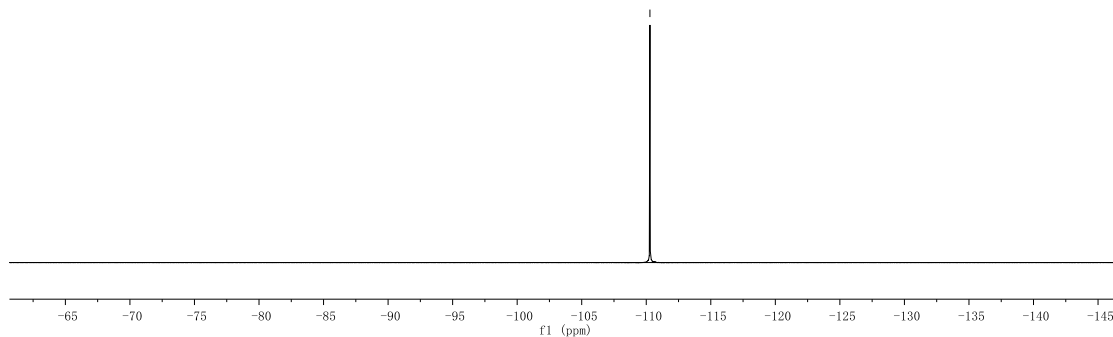

7.586  
7.582  
7.464  
7.384  
7.348  
7.280  
7.229  
6.837  
6.824  
6.808  
6.780  
6.760  
6.740  
6.290  
6.279  
6.274  
6.263  
6.246  
6.245  
6.240  
6.225  
6.223  
6.196  
6.125

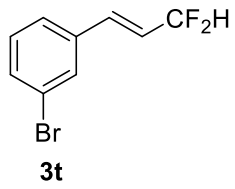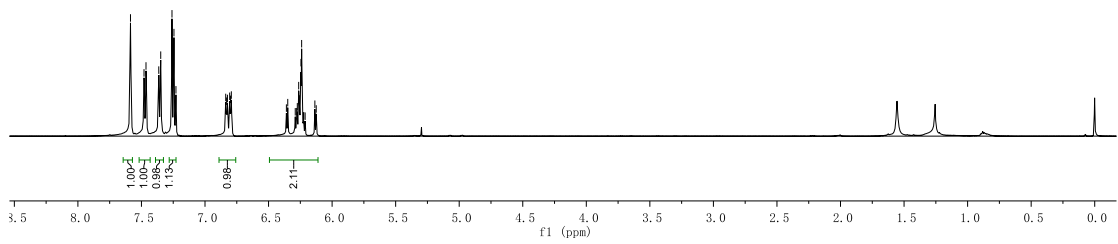

136.672  
135.682  
135.586  
135.500  
135.471  
130.471  
126.004  
123.108  
122.809  
122.418  
116.822  
116.785  
113.054

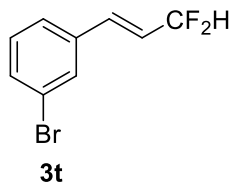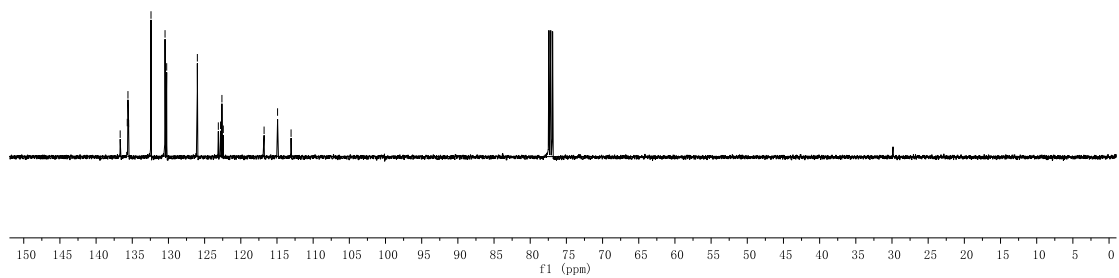

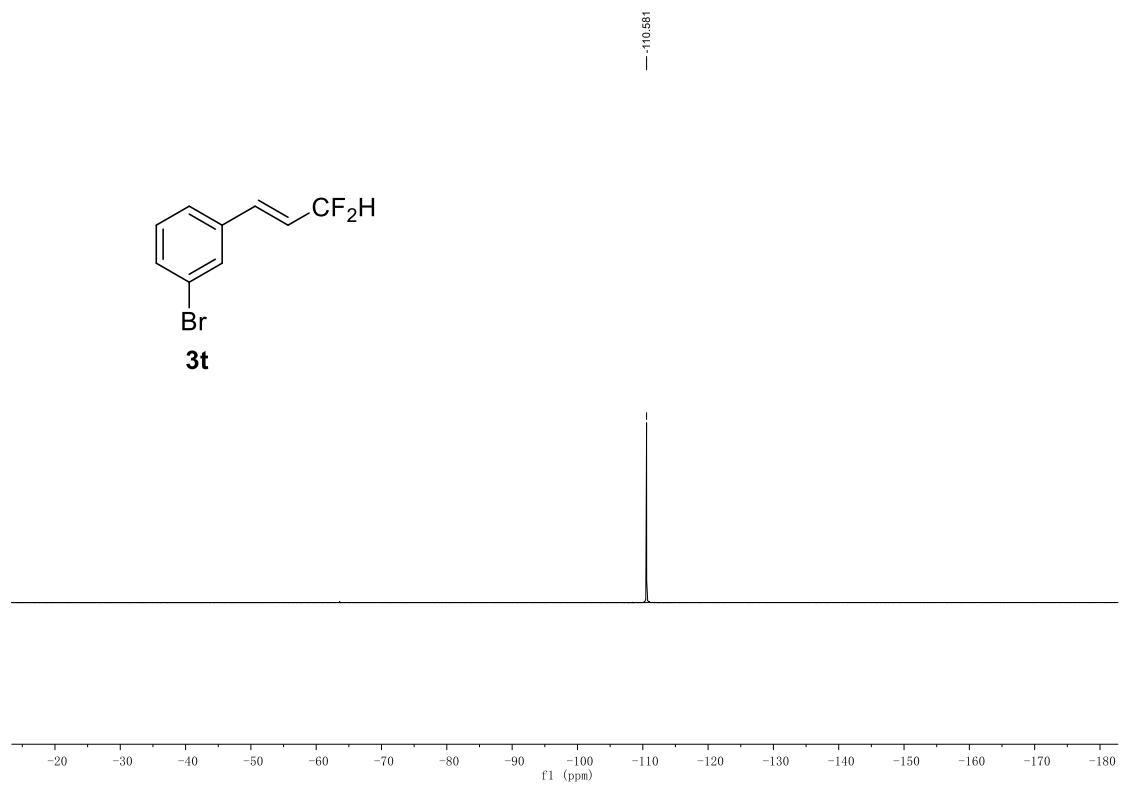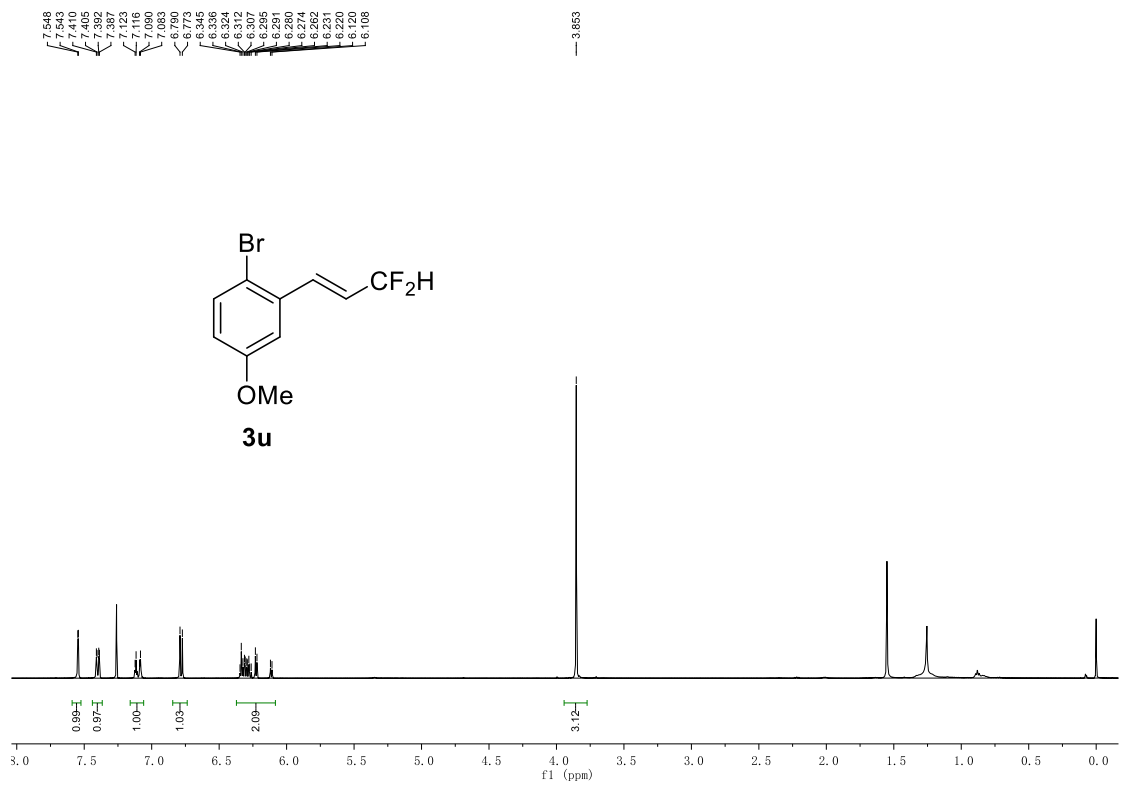

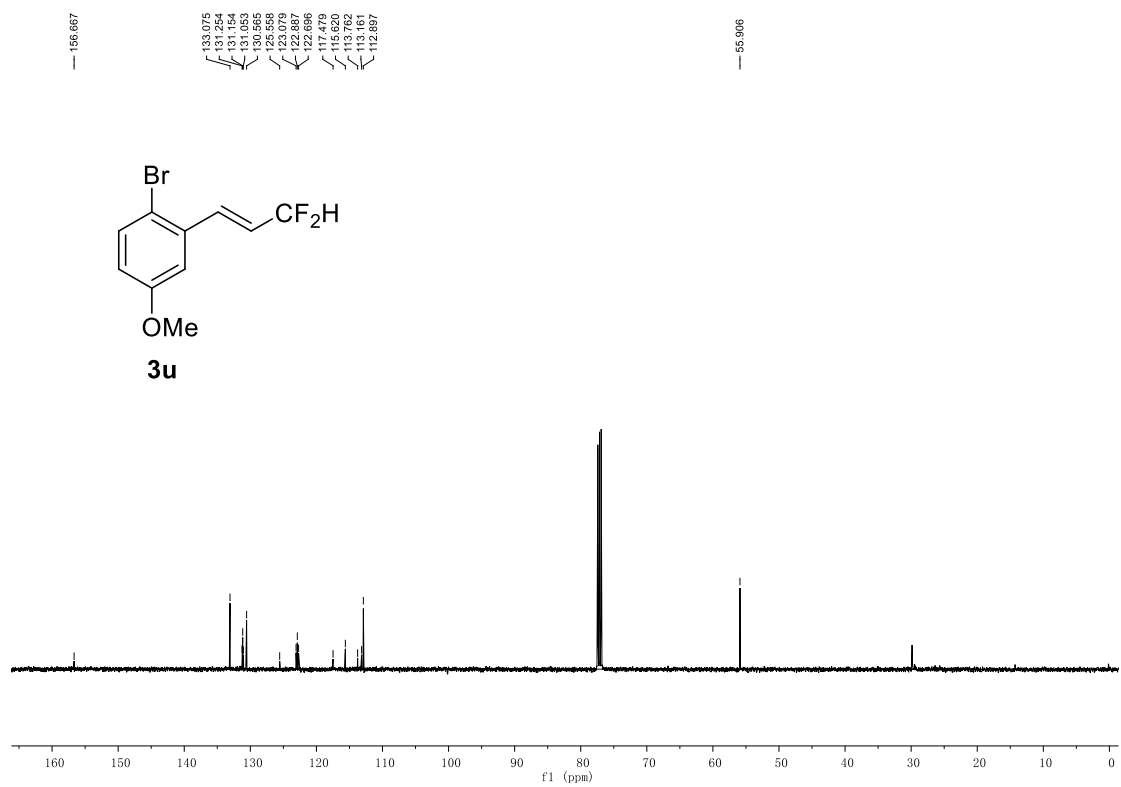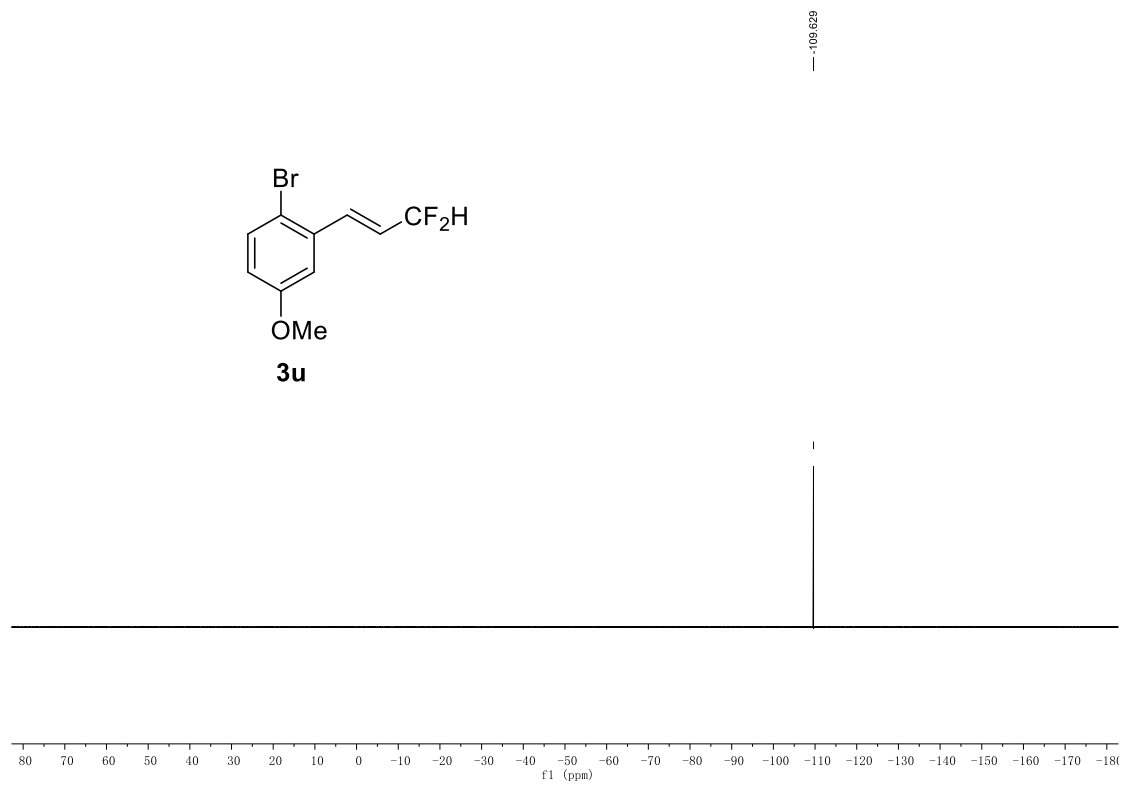

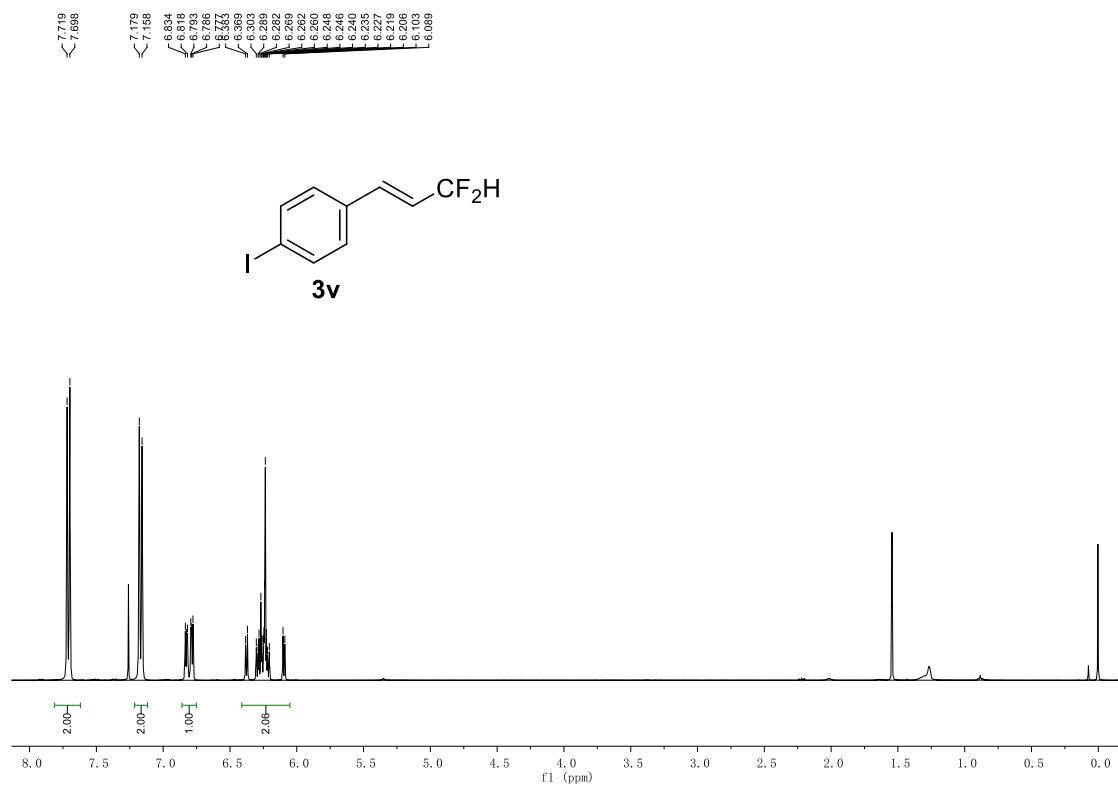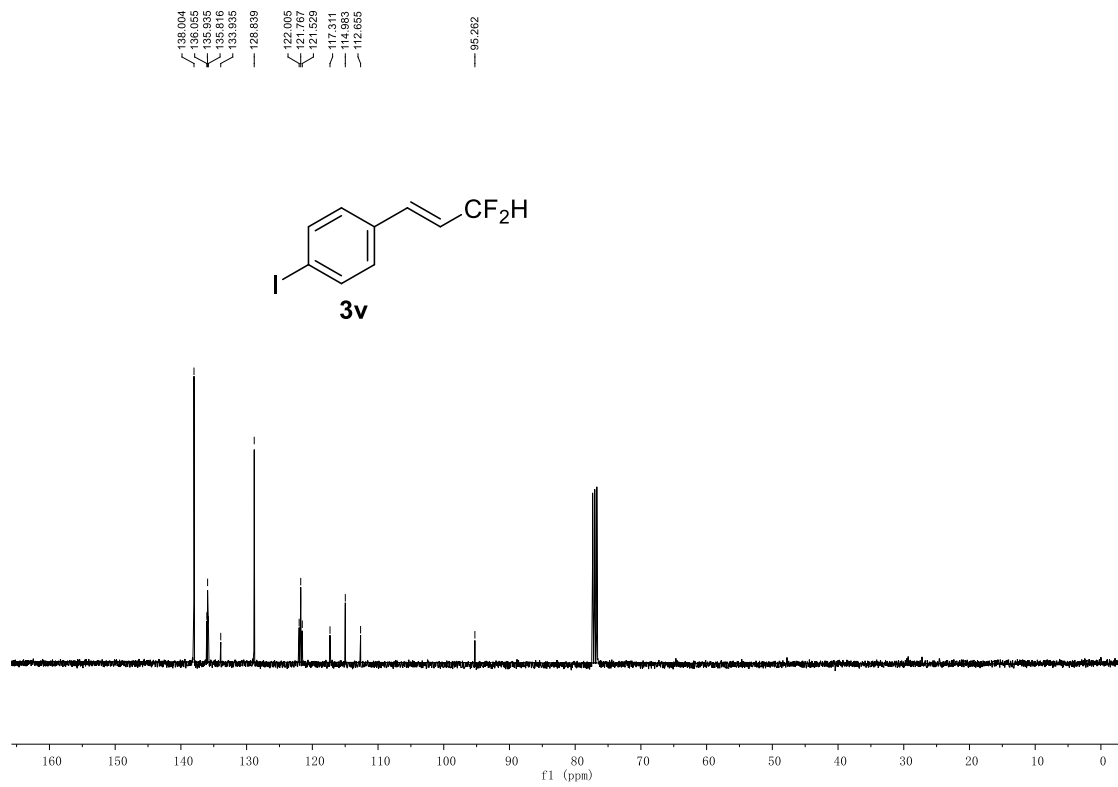

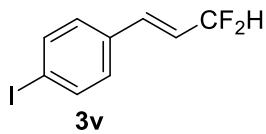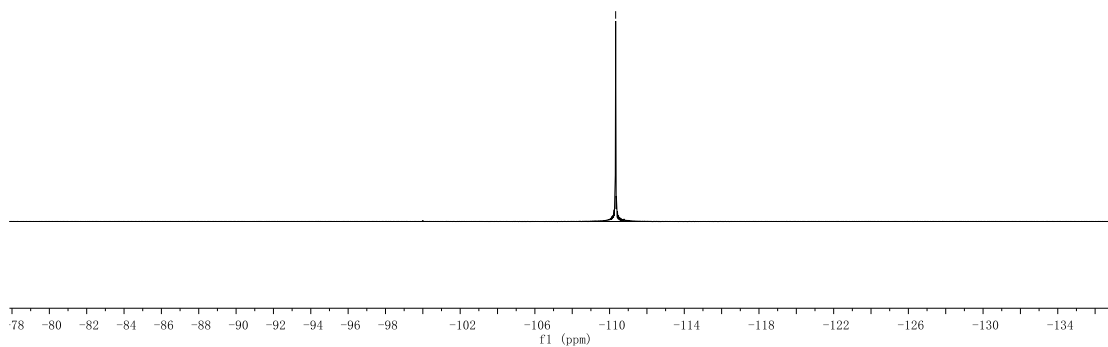

7.846  
 7.831  
 7.517  
 7.511  
 7.505  
 7.487  
 7.085  
 7.079  
 7.022  
 6.430  
 6.419  
 6.415  
 6.407  
 6.389  
 6.384  
 6.371  
 6.369  
 6.367  
 6.350  
 6.339  
 6.317  
 6.305  
 6.292  
 6.194

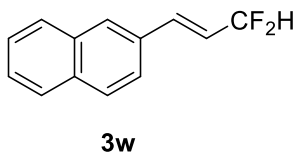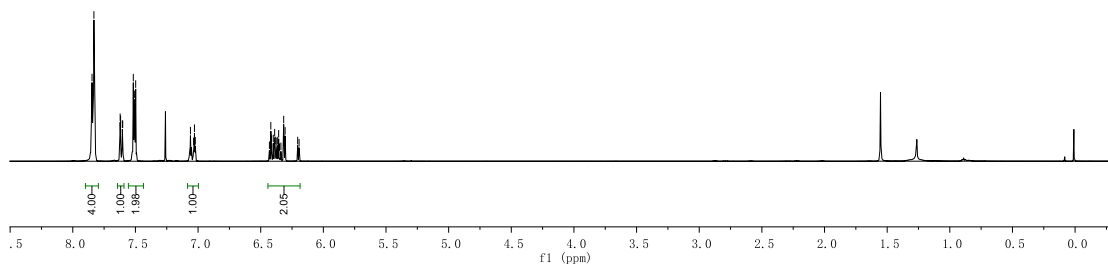

137.393  
137.296  
137.190  
133.410  
133.450  
132.016  
128.764  
128.465  
128.435  
127.903  
126.969  
126.786  
126.781  
124.498  
121.318  
121.128  
117.439  
115.951  
113.722

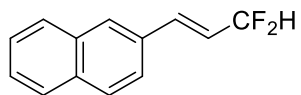

**3w**

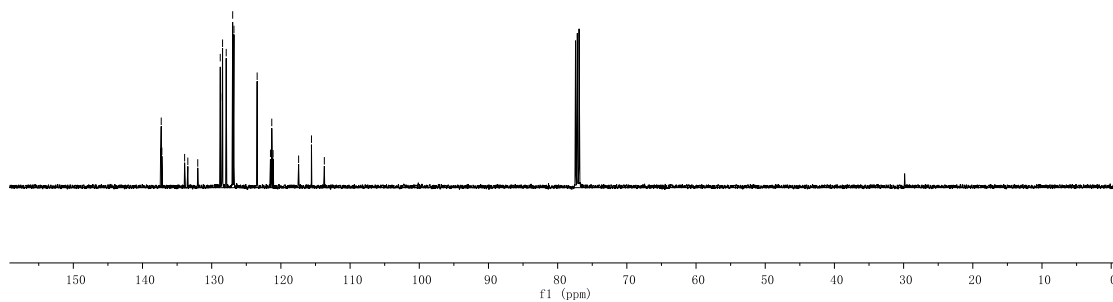

-109.584

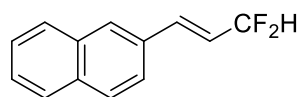

**3w**

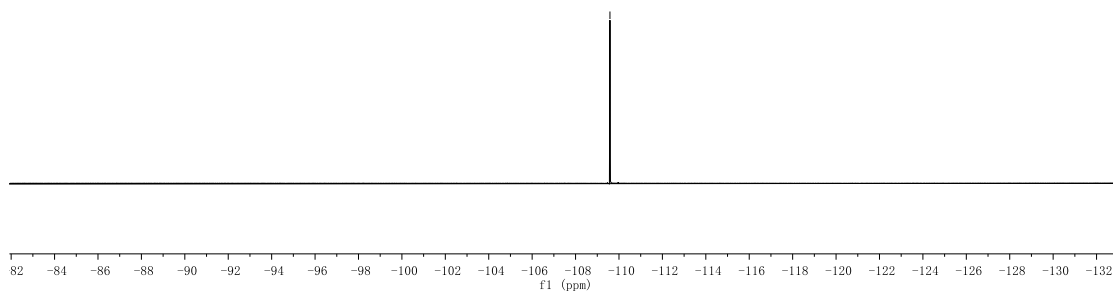

x11-1-41-10

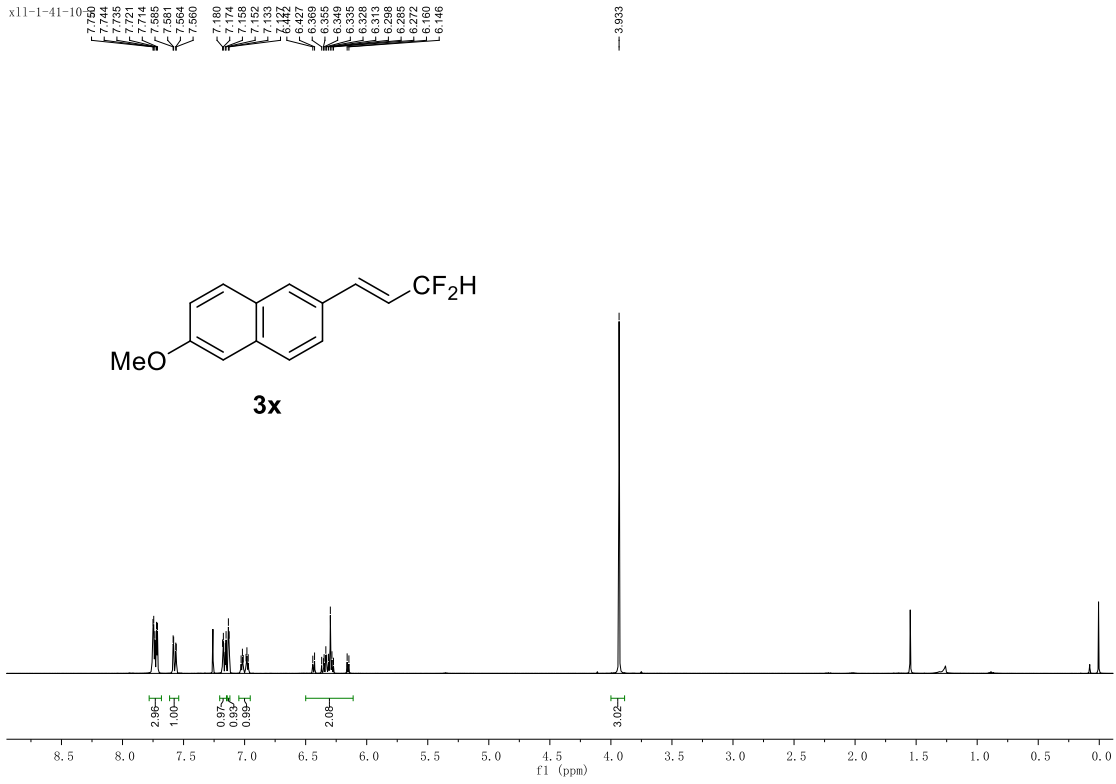

158.615

137.564, 137.442, 137.321, 135.265, 129.668, 128.264, 127.563, 124.071, 120.685, 119.559, 120.010, 118.125, 115.808, 108.689

55.508

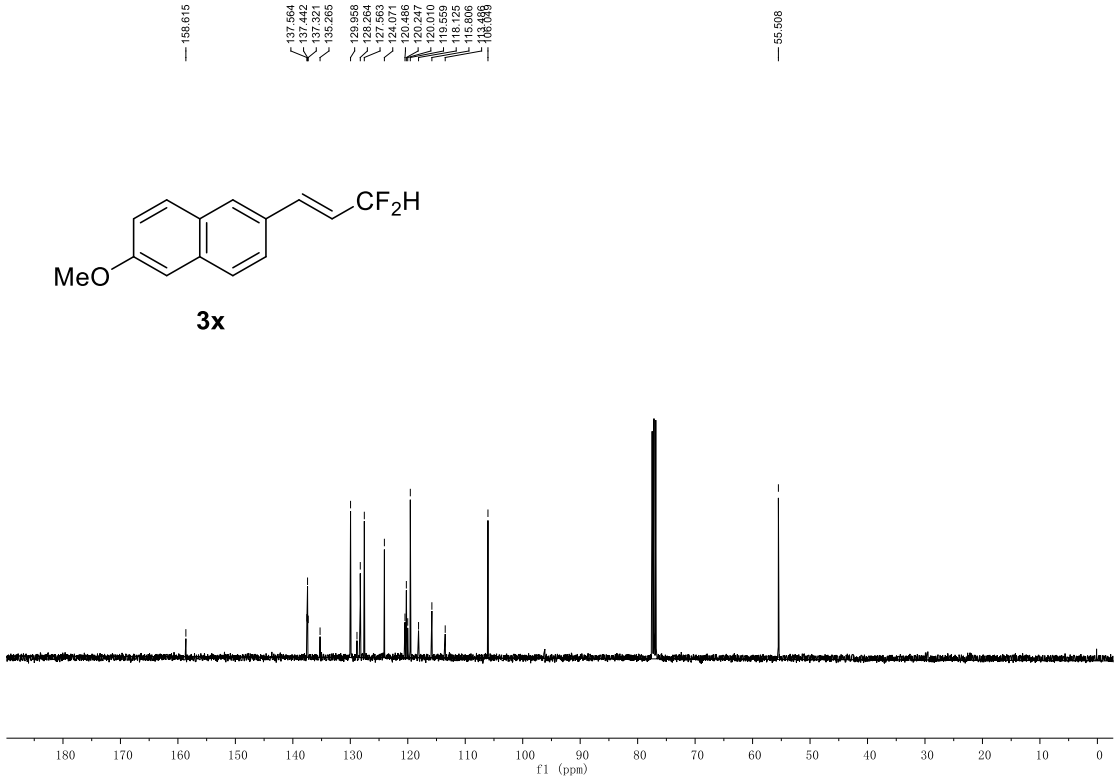



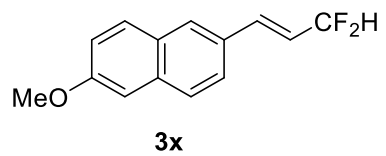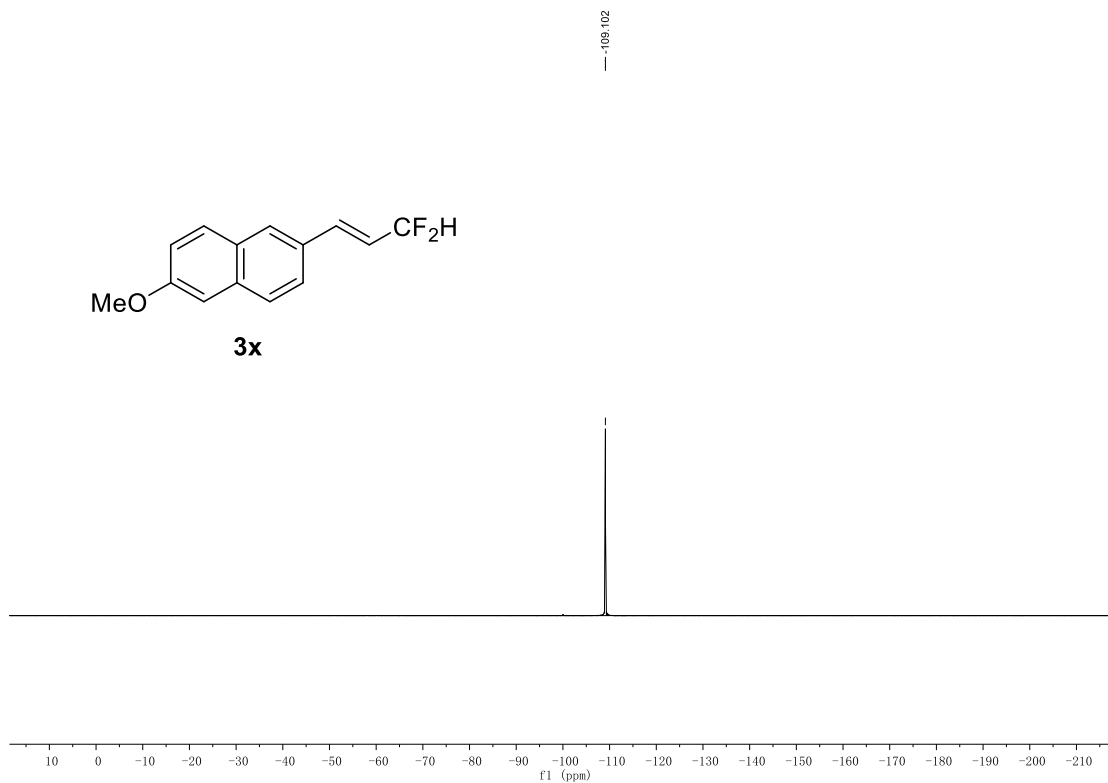

7.629  
 7.626  
 7.621  
 7.605  
 7.595  
 7.585  
 7.483  
 7.478  
 7.464  
 7.460  
 7.458  
 7.394  
 7.391  
 7.380  
 7.365  
 6.976  
 6.624  
 6.621  
 6.553  
 6.429  
 6.413  
 6.007  
 6.007  
 6.003  
 6.000  
 5.997  
 5.984  
 5.984  
 5.977  
 5.974  
 5.971  
 5.967  
 5.954

2.250  
 2.247  
 2.243  
 2.240  
 2.235  
 2.232

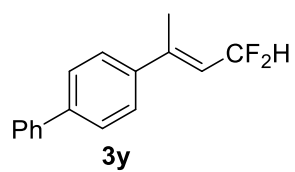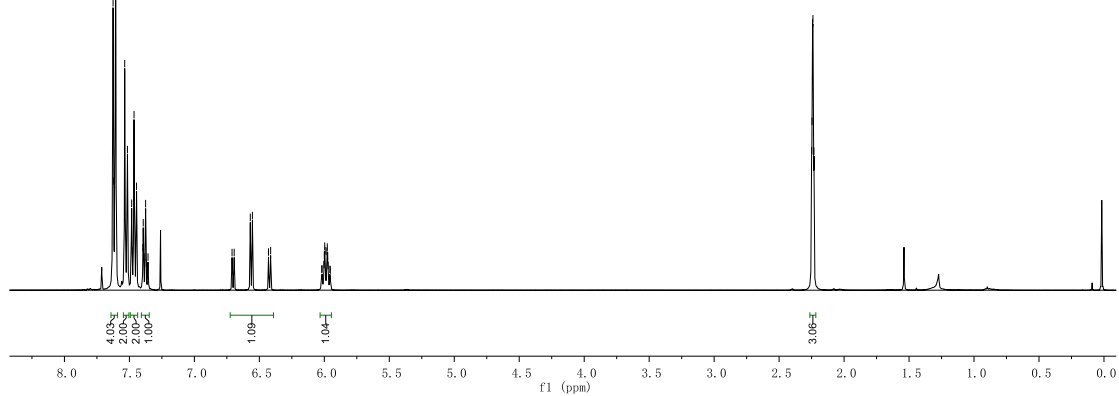

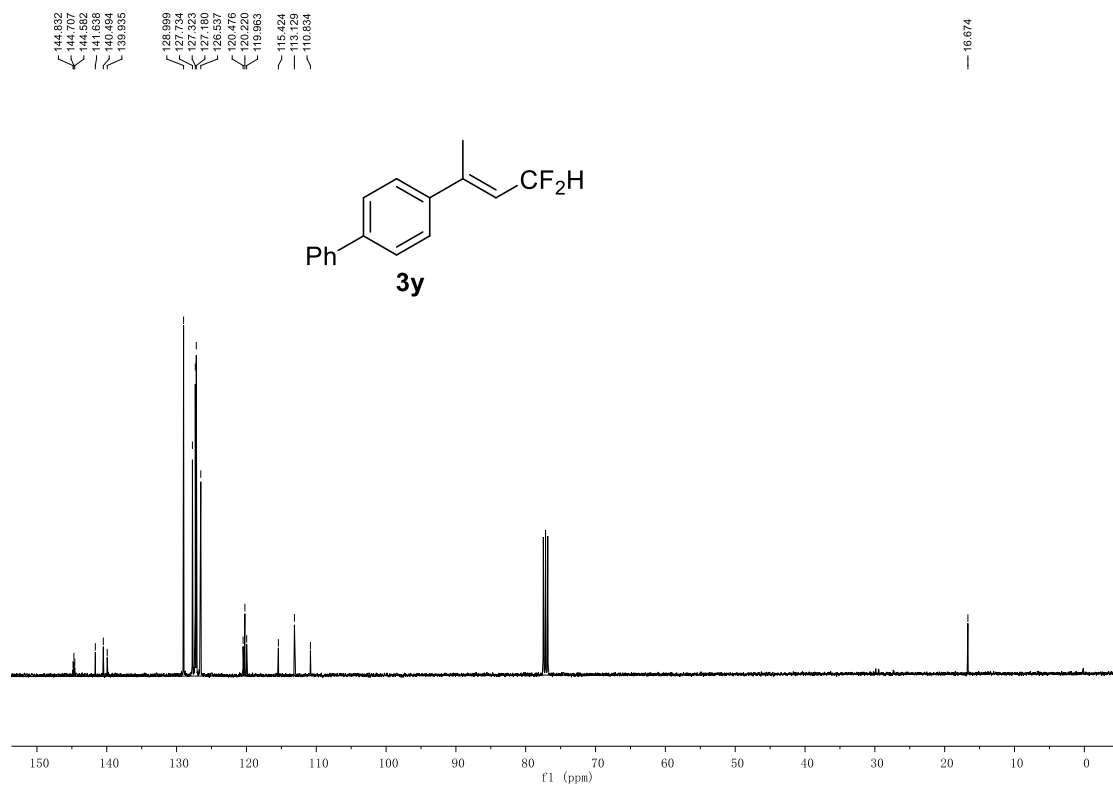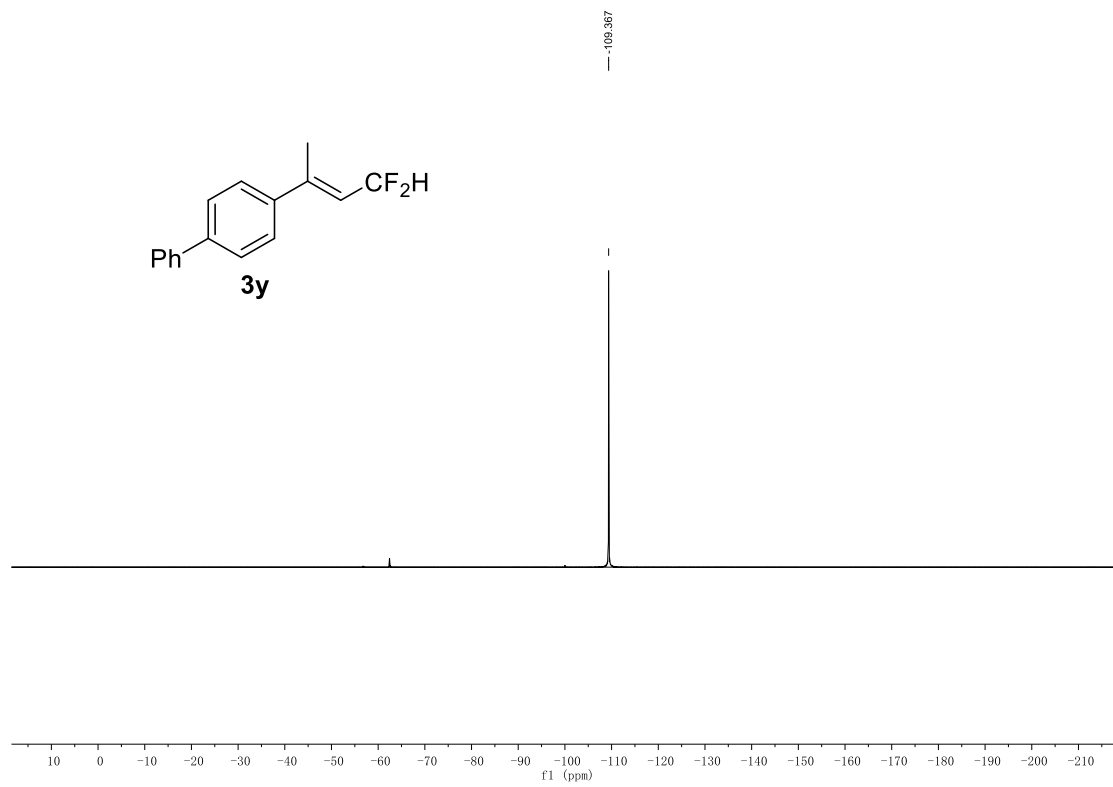

7.623  
7.621  
7.617  
7.607  
7.593  
7.586  
7.483  
7.482  
7.452  
7.389  
7.384  
7.372  
7.357  
7.311  
7.294  
5.990  
5.991  
5.972  
5.971  
5.868  
5.859  
5.763  
5.754  
5.745

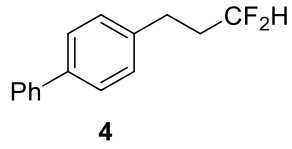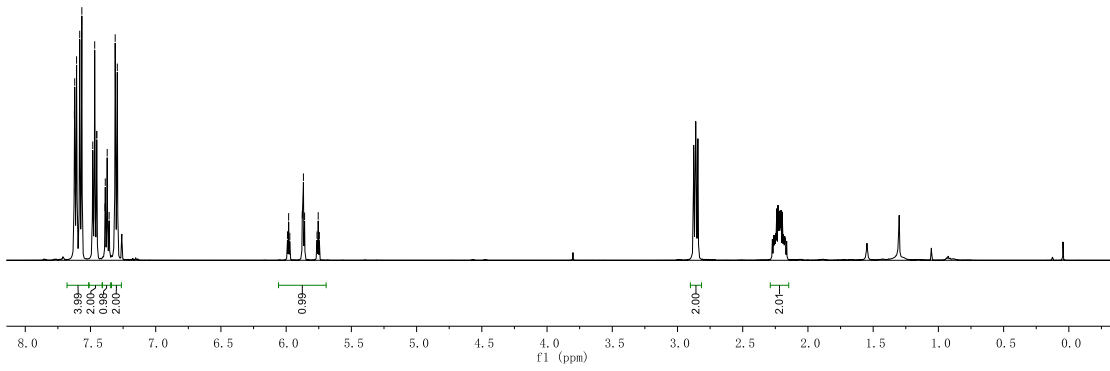

140.564  
139.565  
139.102  
129.608  
128.870  
127.506  
127.342  
127.135  
118.717  
118.616  
114.915  
35.933  
35.765  
35.596  
28.211  
28.161  
28.112

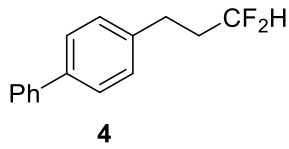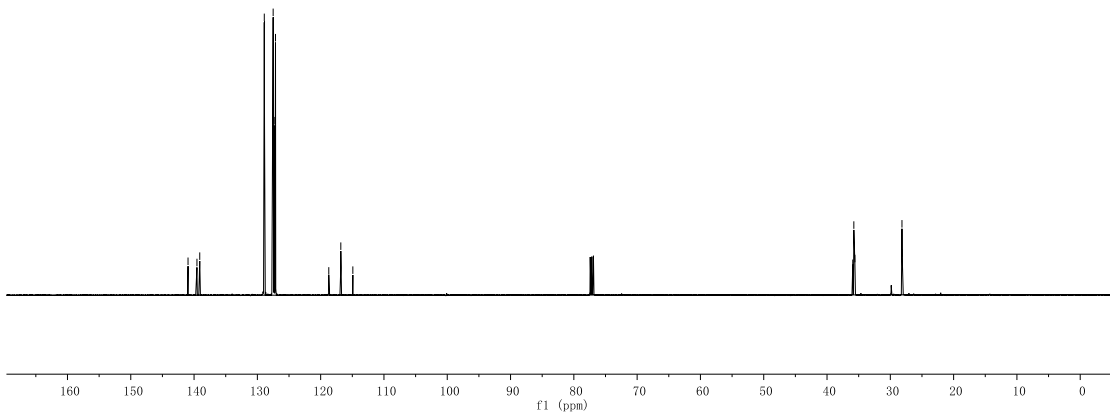

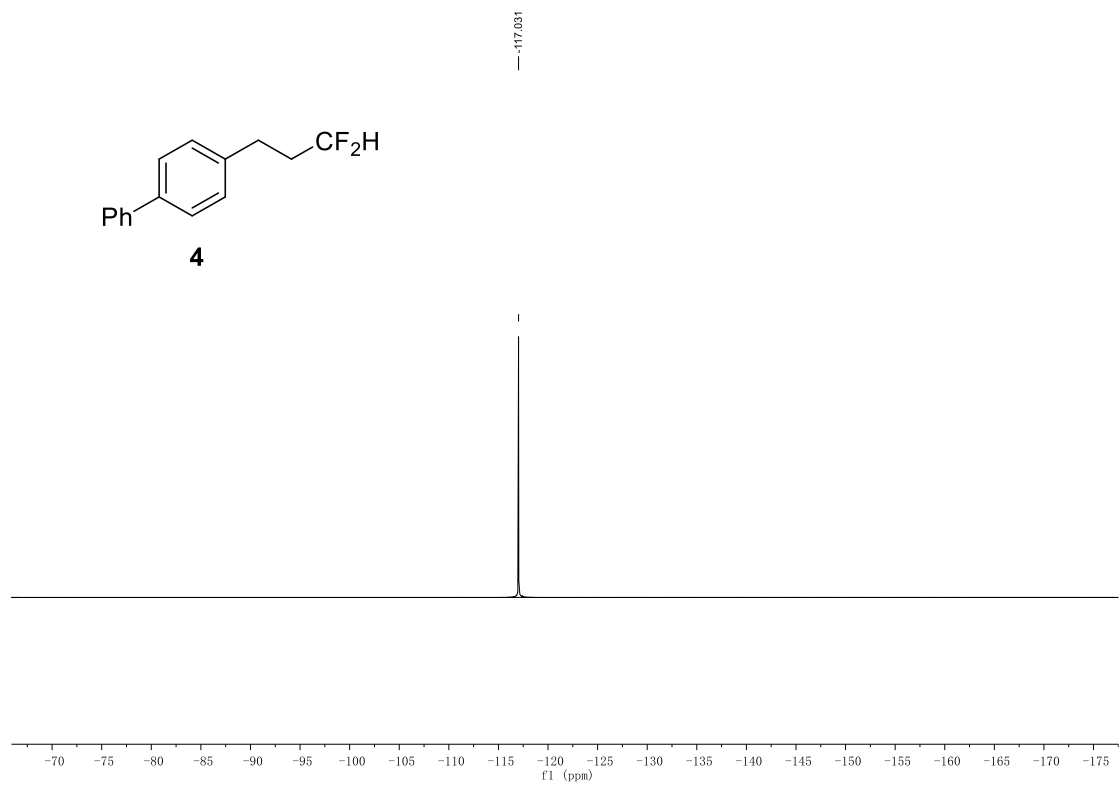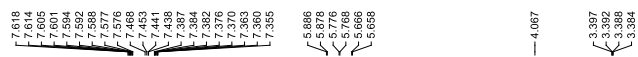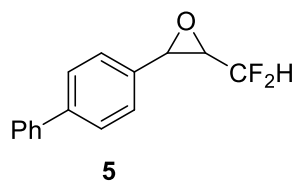

142.052  
140.360

133.510  
128.868  
127.642  
127.471  
127.105  
126.261

115.598  
113.674  
111.750

59.072  
58.815  
58.558  
54.892  
54.632  
54.651  
54.621

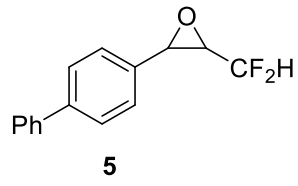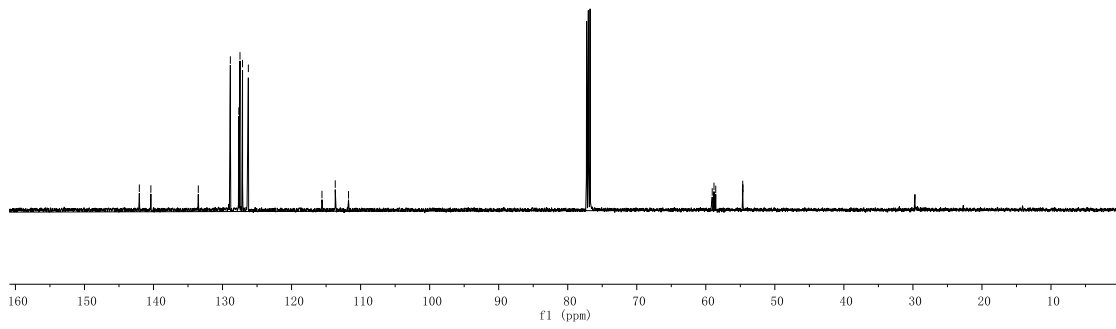

-122.495  
-123.137  
-124.413  
-124.654

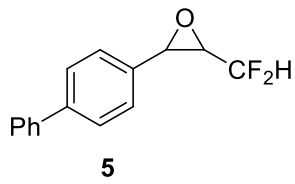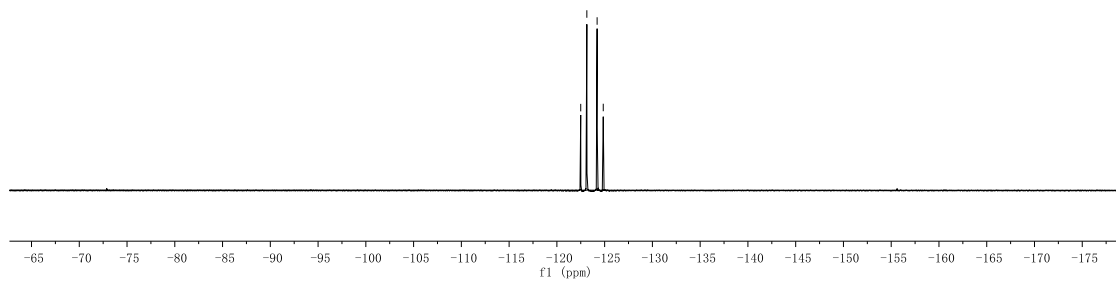

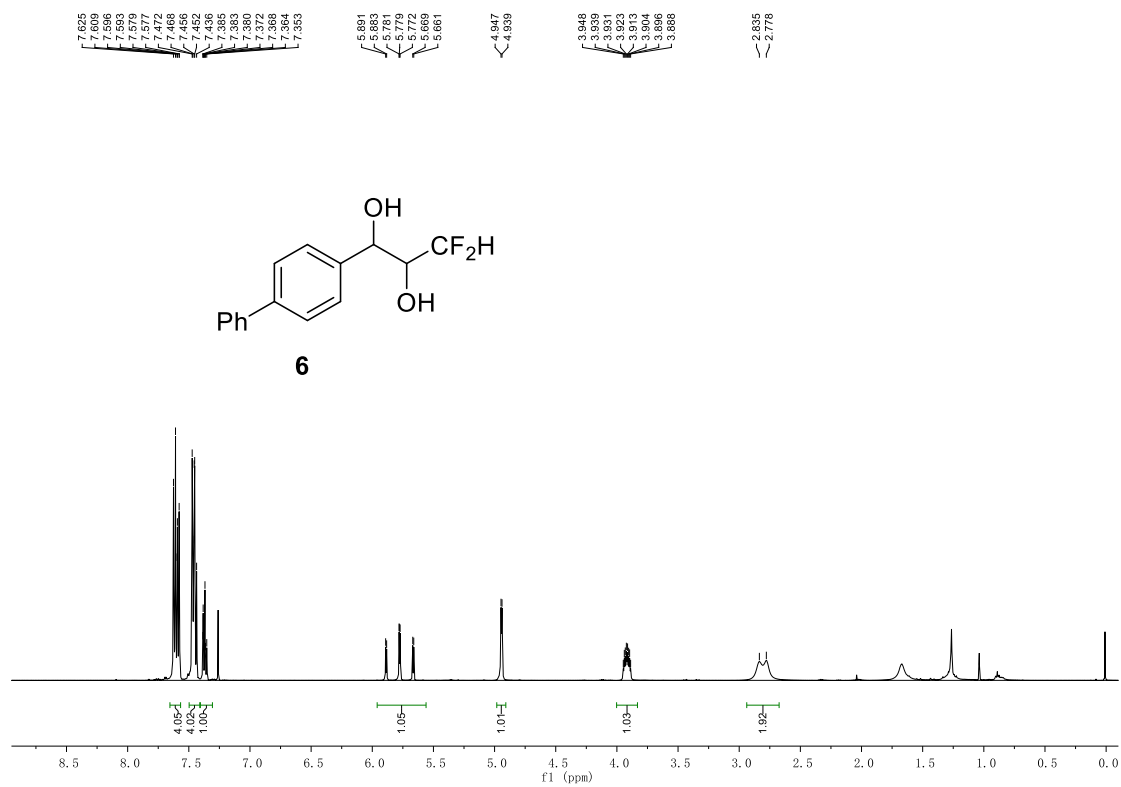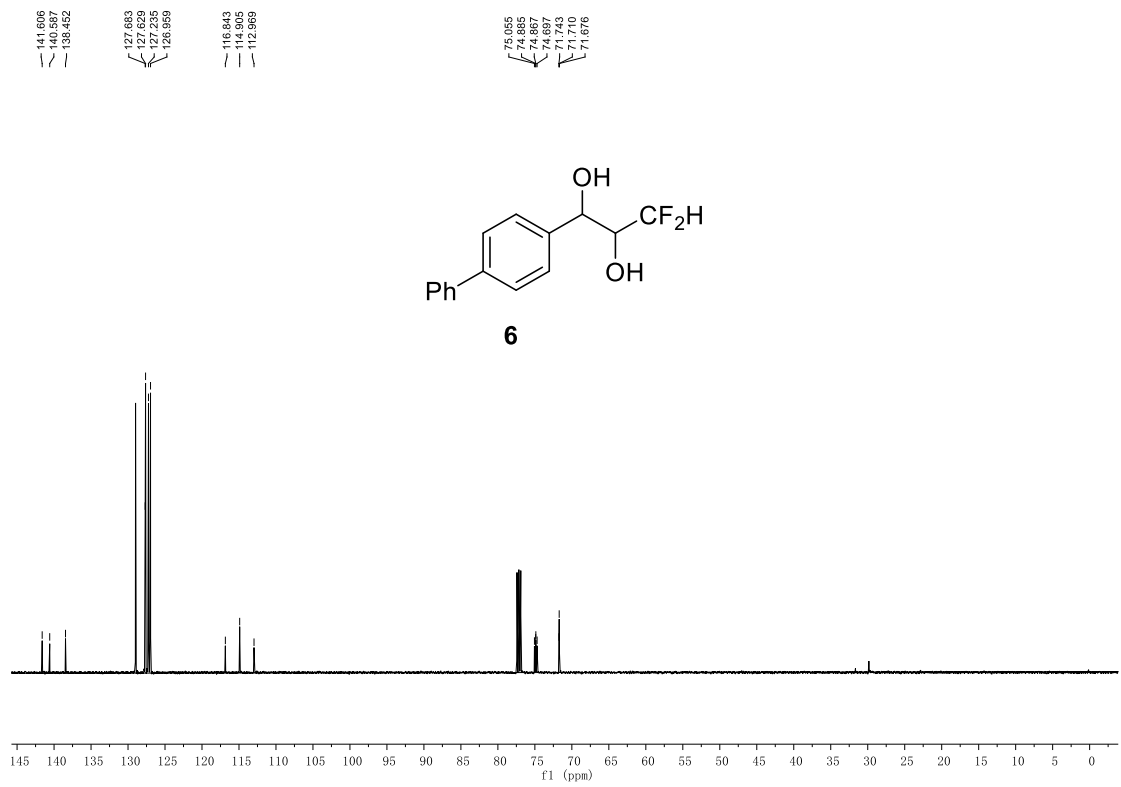

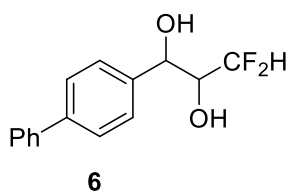

--- 128.715  
 --- 129.333  
 --- 131.609  
 --- 132.226

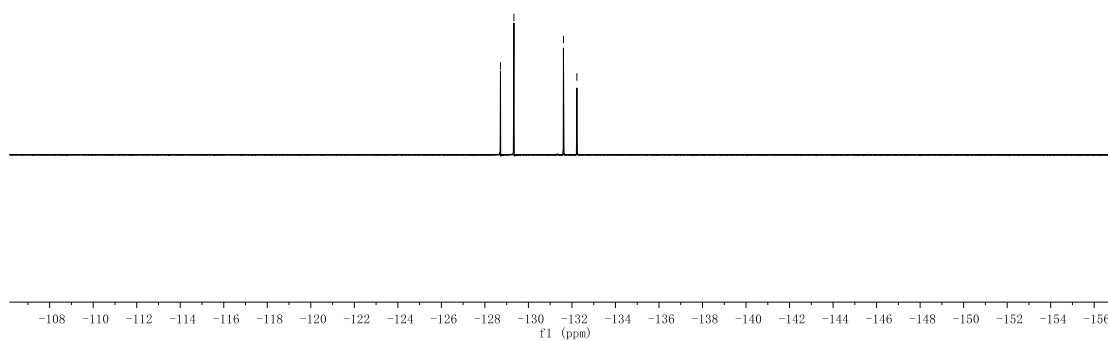

7.639  
 7.634  
 7.630  
 7.619  
 7.617  
 7.615  
 7.604  
 7.602  
 7.601  
 7.601  
 7.595  
 7.472  
 7.461  
 7.457  
 7.453  
 7.448  
 7.445  
 7.440  
 7.388  
 7.388  
 7.385  
 6.988  
 6.985  
 6.985  
 6.392  
 6.284  
 6.281  
 5.161  
 5.139  
 4.737  
 4.734  
 4.733  
 4.732  
 4.715  
 4.712  
 4.710  
 4.707  
 4.699  
 4.690  
 4.688  
 4.685  
 4.671  
 4.668  
 4.666  
 4.663

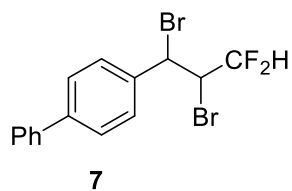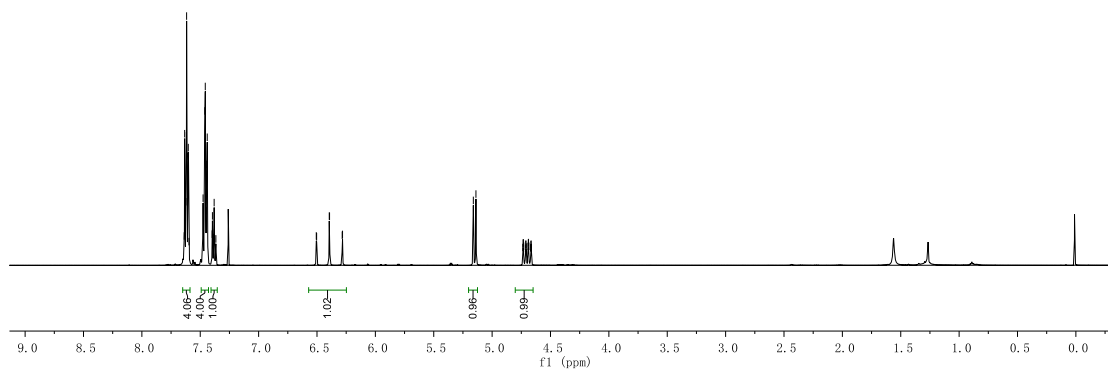

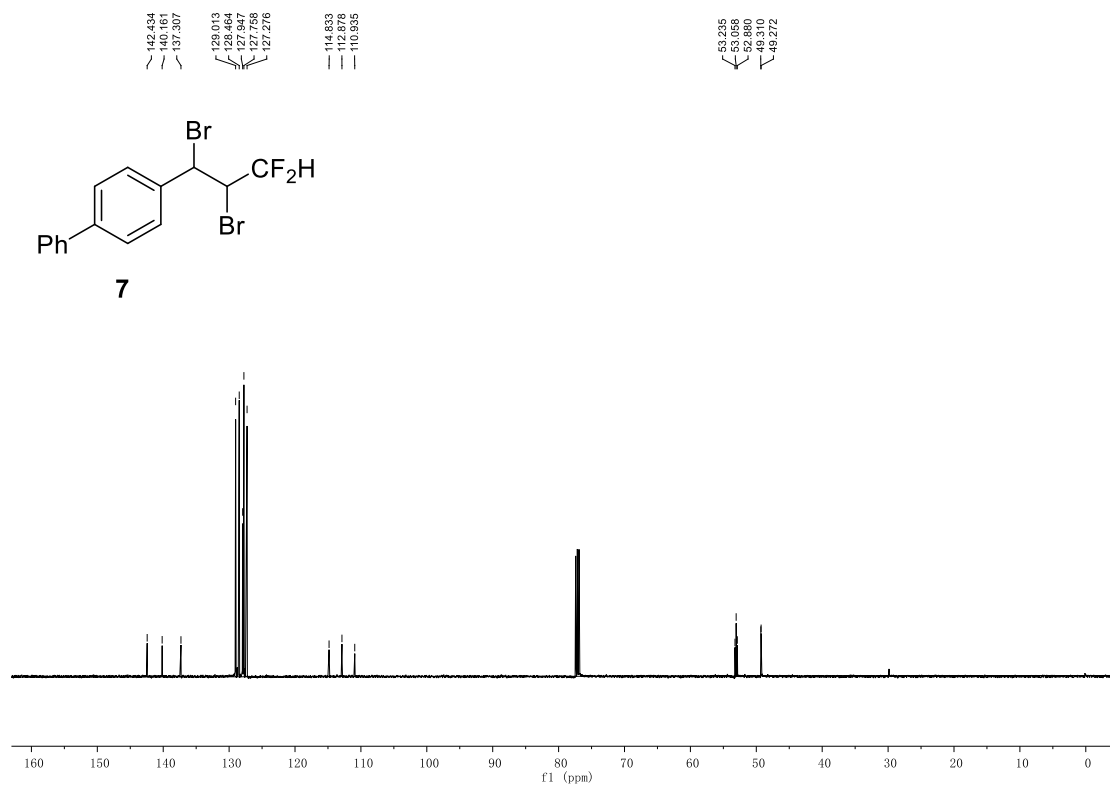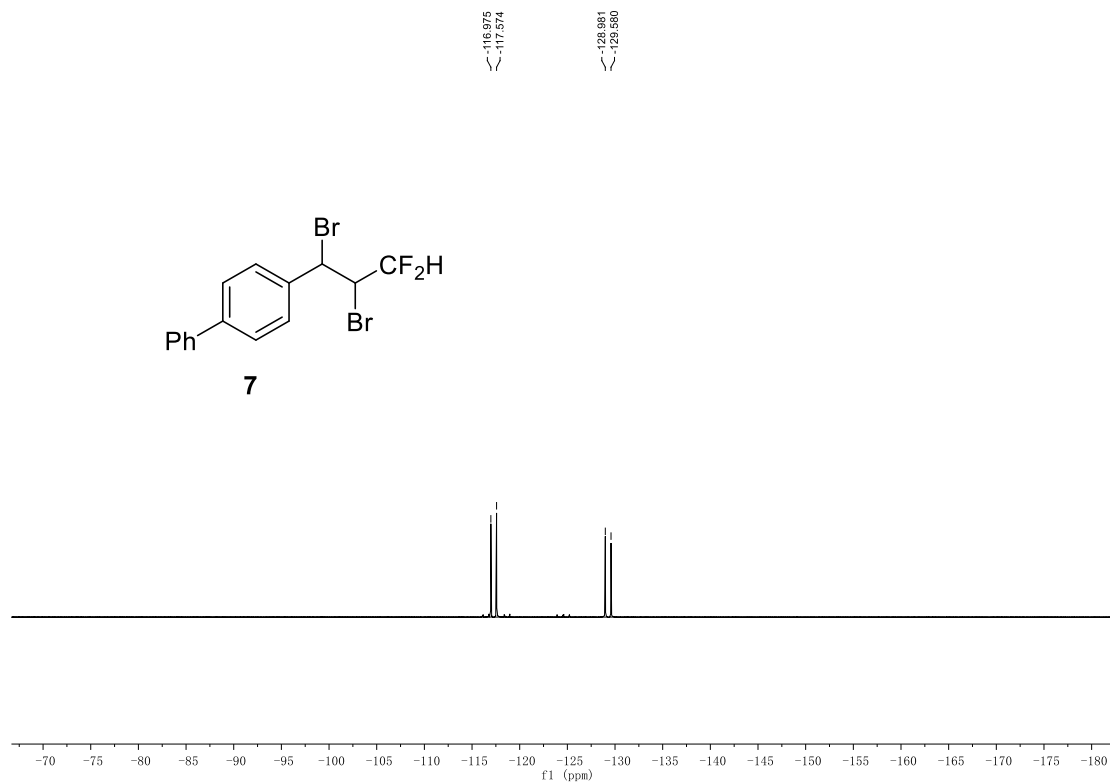



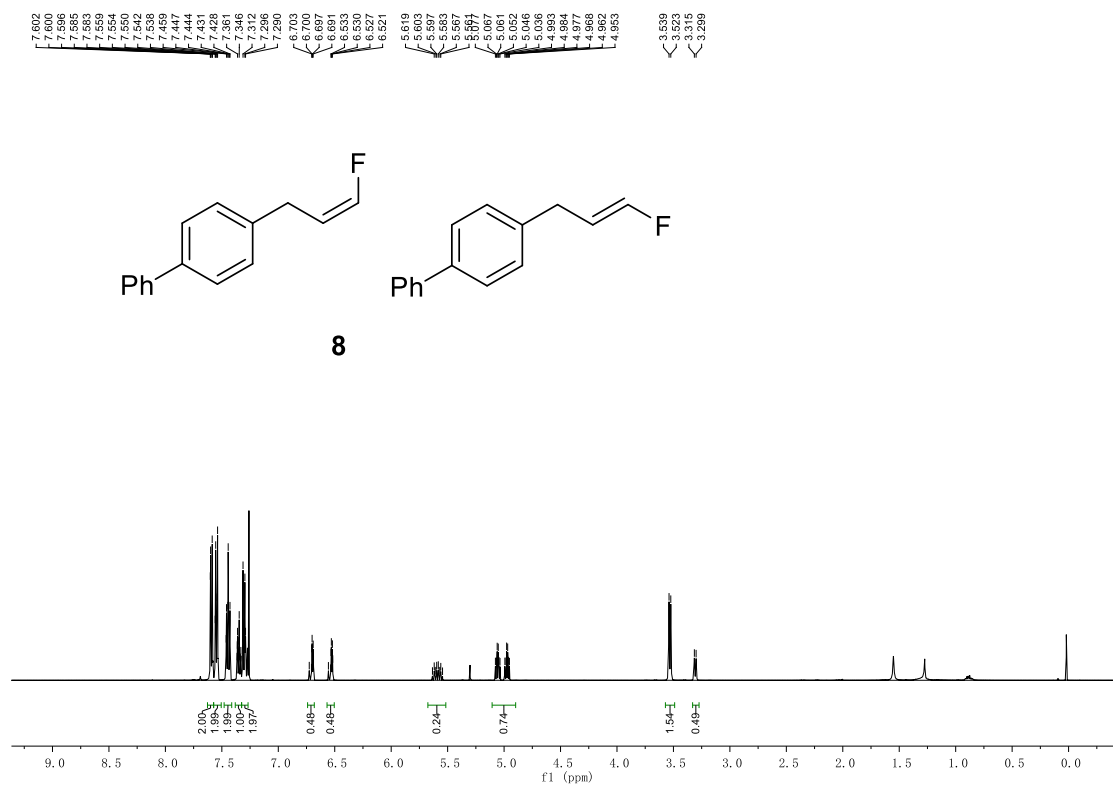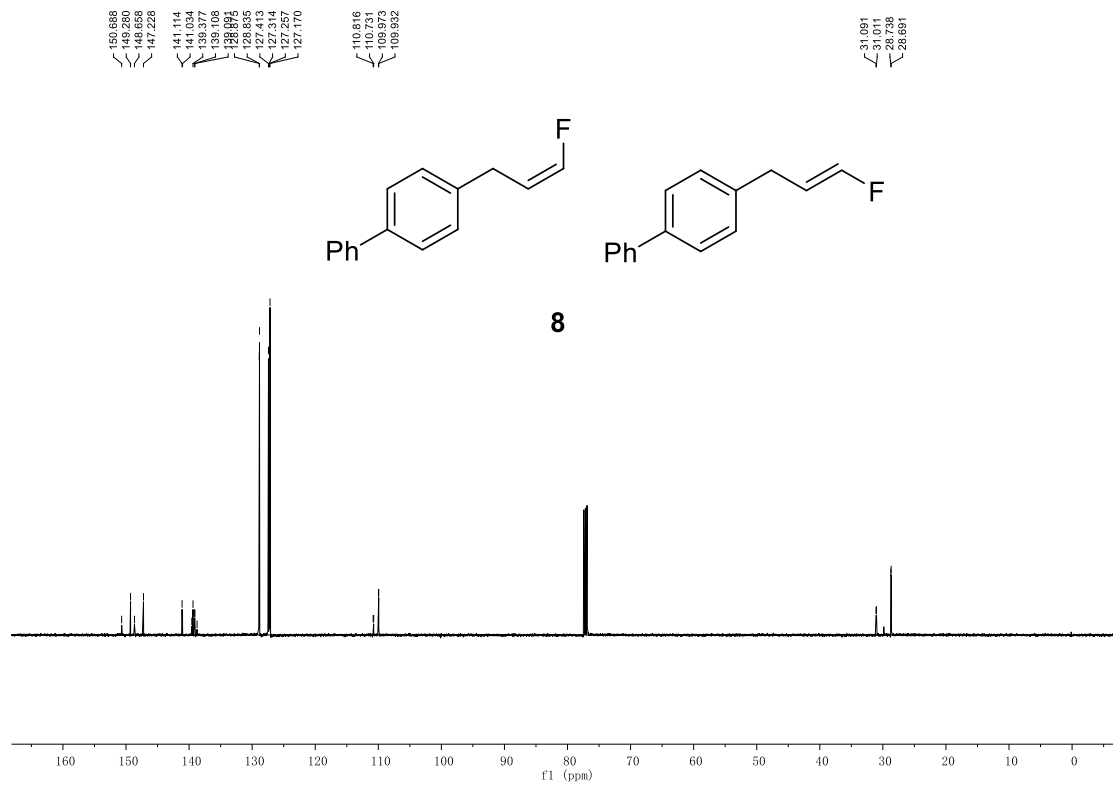

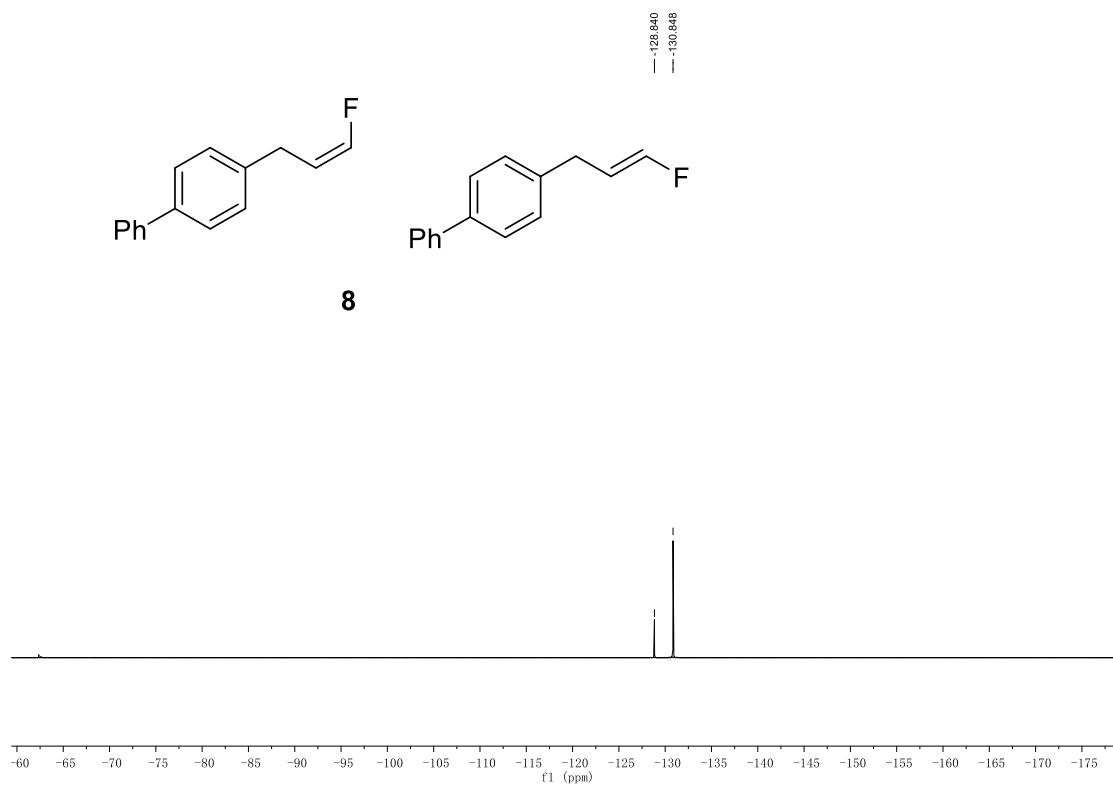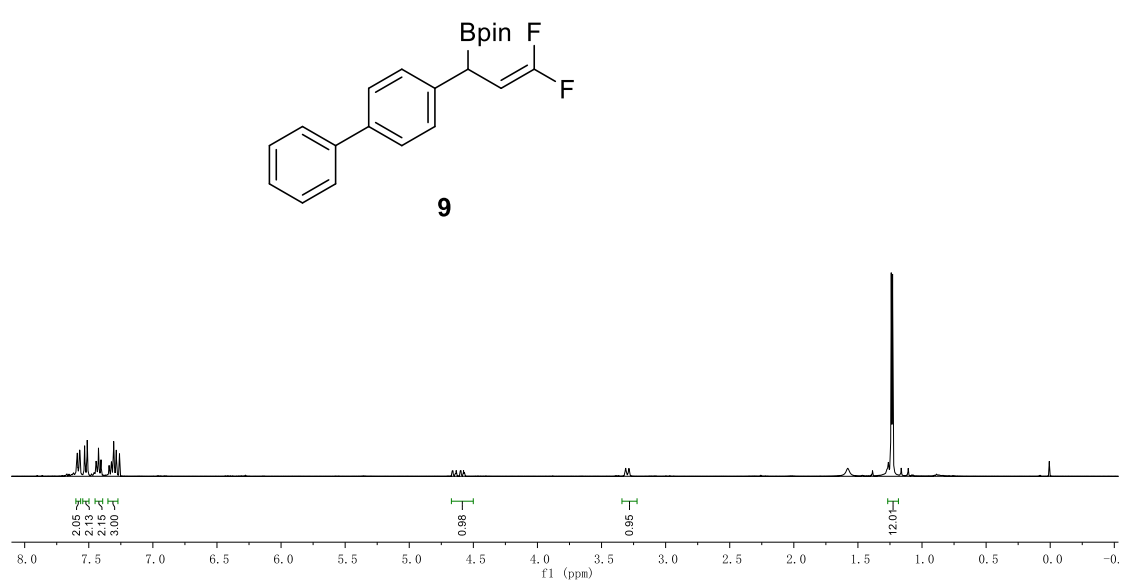

159.385  
156.106  
153.823

141.070  
140.069  
140.053  
138.886  
138.886  
128.846  
128.345  
127.474  
127.102  
127.102

84.168  
79.245  
79.083  
79.082  
78.900

24.723  
24.710

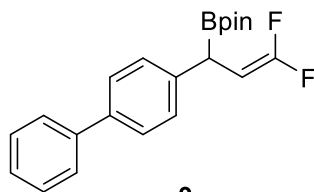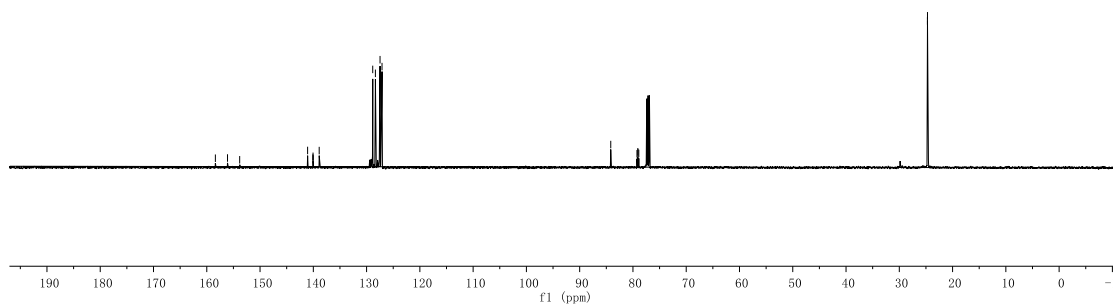

88.563  
89.085  
90.313  
90.435

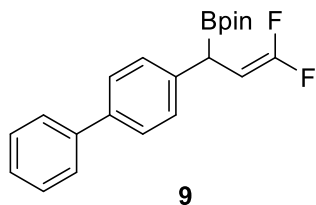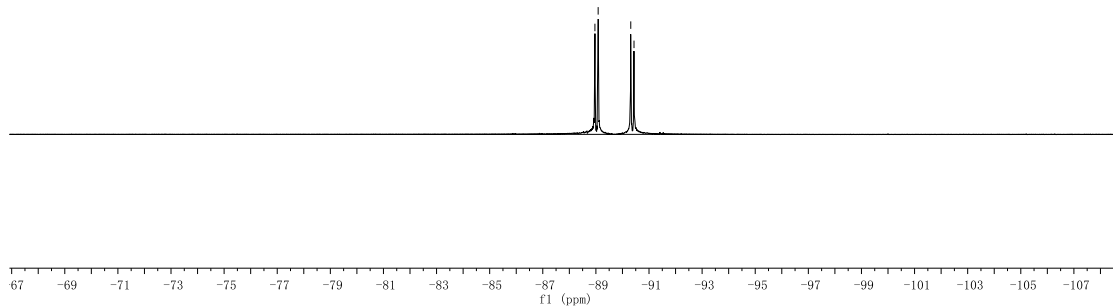

Supplement: d3qo00691c1.pdf [file d3qo00691c1.pdf]
